# Supplementary material
Source: publisher site journal article supplement (https://www.dovepress.com/article/333209)
Supplement: Supplementary file 1 [file get_supplementary_file.php]

**
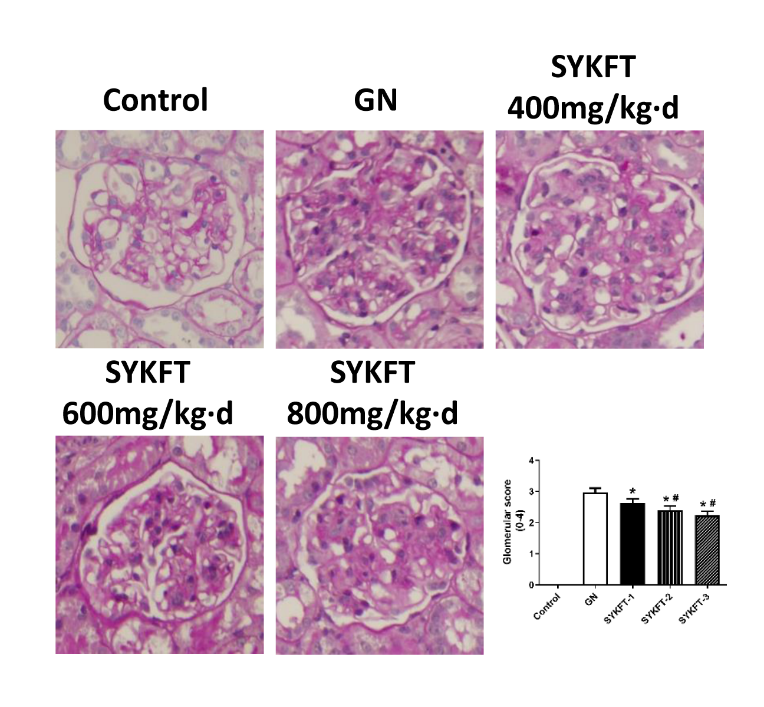
Figure S1.** Renal pathological changes in the control group, GN group, and 3 SYKFT doses treatment group. (* p<0.05 versus the control group; # p<0.05 versus the model group).

| **Table S1. Primers for RT-PCR** | |
| --- | --- |
| **Gene** | **Primer sequences (5’-3’)** |
| RELA | TGAACCGAAACTCTGGCAGCTG |
|  | CATCAGCTTGCGAAAAGGAGCC |
| TP53 | TCAGCATCTTATCCGAGTGGAA |
|  | AGGGCACCACCACACTATGTC |
| STAT3 | CTTTGAGACCGAGGTGTATCACC |
|  | GGTCAGCATGTTGTACCACAGG |
| MAPK14 | GAGCGTTACCAGAACCTGTCTC |
|  | AGTAACCGCAGTTCTCTGTAGGT |
| IL12 | TGCCTTCACCACTCCCAAAACC |
|  | CAATCTCTTCAGAAGTGCAAGGG |
| MAPK1 | ACACCAACCTCTCGTACATCGG |
|  | TGGCAGTAGGTCTGGTGCTCAA |
| AKT1 | TGACCATGAACGAGTTTGAGTA |
|  | GAGGATCTTCATGGCGTAGTAG |
| TNF | CGTGGAGCTGGCCGAGGAG |
|  | GCAGGCAGAAGAGCGTGGTG |
| IL6 | AGACAGCCACTCACCTCTTCAG |
|  | TTCTGCCAGTGCCTCTTTGCTG |
| MYC | CCTGGTGCTCCATGAGGAGAC |
|  | CAGACTCTGACCTTTTGCCAGG |
| MAPK8 | TGAAGCAGAAGCTCCACCAC |
|  | CAGCCCTCTCCTTTAGGTGC |
| JUN | CAAACCTCAGCAACTTCAACC |
|  | CTGGGACTCCATGTCGATG |
| FOS | CTTCCCAGAAGAGATGTCTGTG |
|  | TGGGAACAGGAAGTCATCAAAG |
| GAPDH | CTGGGCTACACTGAGCACC |
|  | AAGTGGTCGTTGAGGGCAATG |

**Table S2. Active ingredients of herbs of SYKFT**

| **Number** | **Mol ID** | **Compound name** | **OB (%)** | **DL** |
| --- | --- | --- | --- | --- |
| 1 | MOL001646 | 2,3-dimethoxy-6-methyanthraquinone | 34.85860475 | 0.26255 |
| 2 | MOL001659 | Poriferasterol | 43.82985158 | 0.75596 |
| 3 | MOL001663 | (4aS,6aR,6aS,6bR,8aR,10R,12aR,14bS)-10-hydroxy-2,2,6a,6b,9,9,12a-heptamethyl-1,3,4,5,6,6a,7,8,8a,10,11,12,13,14b-tetradecahydropicene-4a-carboxylic acid | 32.02801329 | 0.75713 |
| 4 | MOL001670 | 2-methoxy-3-methyl-9,10-anthraquinone | 37.82770556 | 0.20517 |
| 5 | MOL000449 | Stigmasterol | 43.82985158 | 0.75665 |
| 6 | MOL000358 | beta-sitosterol | 36.91390583 | 0.75123 |
| 7 | MOL000098 | quercetin | 46.43334812 | 0.27525 |
| 8 | MOL001870 | LUTEOLINIDIN | 53.65744635 | 0.21616 |
| 9 | MOL000387 | Bifendate | 31.09782391 | 0.66553 |
| 10 | MOL001601 | 1,2,5,6-tetrahydrotanshinone | 38.74538672 | 0.35791 |
| 11 | MOL001771 | poriferast-5-en-3beta-ol | 36.91390583 | 0.75034 |
| 12 | MOL001942 | isoimperatorin | 45.46424674 | 0.22524 |
| 13 | MOL002222 | sugiol | 36.11353486 | 0.27648 |
| 14 | MOL002651 | Dehydrotanshinone II A | 43.76228599 | 0.40019 |
| 15 | MOL002776 | Baicalin | 40.12360996 | 0.75264 |
| 16 | MOL000569 | digallate | 61.84861803 | 0.25635 |
| 17 | MOL000006 | luteolin | 36.16262934 | 0.24552 |
| 18 | MOL006824 | α-amyrin | 39.51208978 | 0.76221 |
| 19 | MOL007036 | 5,6-dihydroxy-7-isopropyl-1,1-dimethyl-2,3-dihydrophenanthren-4-one | 33.76525236 | 0.28585 |
| 20 | MOL007041 | 2-isopropyl-8-methylphenanthrene-3,4-dione | 40.86015408 | 0.22897 |
| 21 | MOL007045 | 3α-hydroxytanshinoneⅡa | 44.92933597 | 0.44272 |
| 22 | MOL007048 | (E)-3-[2-(3,4-dihydroxyphenyl)-7-hydroxy-benzofuran-4-yl]acrylic acid | 48.24363244 | 0.31229 |
| 23 | MOL007049 | 4-methylenemiltirone | 34.34867589 | 0.22726 |
| 24 | MOL007050 | 2-(4-hydroxy-3-methoxyphenyl)-5-(3-hydroxypropyl)-7-methoxy-3-benzofurancarboxaldehyde | 62.78414726 | 0.39628 |
| 25 | MOL007051 | 6-o-syringyl-8-o-acetyl shanzhiside methyl ester | 46.6906586 | 0.71145 |
| 26 | MOL007058 | formyltanshinone | 73.444622 | 0.41736 |
| 27 | MOL007059 | 3-beta-Hydroxymethyllenetanshiquinone | 32.16103376 | 0.40894 |
| 28 | MOL007061 | Methylenetanshinquinone | 37.07319368 | 0.36017 |
| 29 | MOL007063 | przewalskin a | 37.10650066 | 0.64901 |
| 30 | MOL007064 | przewalskin b | 110.3240001 | 0.43809 |
| 31 | MOL007068 | Przewaquinone B | 62.24005962 | 0.41374 |
| 32 | MOL007069 | przewaquinone c | 55.7416731 | 0.40408 |
| 33 | MOL007070 | (6S,7R)-6,7-dihydroxy-1,6-dimethyl-8,9-dihydro-7H-naphtho[8,7-g]benzofuran-10,11-dione | 41.31045706 | 0.453 |
| 34 | MOL007071 | przewaquinone f | 40.30788399 | 0.45925 |
| 35 | MOL007077 | sclareol | 43.67068458 | 0.2058 |
| 36 | MOL007079 | tanshinaldehyde | 52.4747043 | 0.45196 |
| 37 | MOL007081 | Danshenol B | 57.9508753 | 0.55764 |
| 38 | MOL007082 | Danshenol A | 56.96524899 | 0.52172 |
| 39 | MOL007085 | Salvilenone | 30.38365387 | 0.37639 |
| 40 | MOL007088 | cryptotanshinone | 52.34196226 | 0.39555 |
| 41 | MOL007093 | dan-shexinkum d | 38.88302101 | 0.55453 |
| 42 | MOL007094 | danshenspiroketallactone | 50.43128103 | 0.3067 |
| 43 | MOL007098 | deoxyneocryptotanshinone | 49.40034705 | 0.28555 |
| 44 | MOL007100 | dihydrotanshinlactone | 38.6847683 | 0.32227 |
| 45 | MOL007101 | dihydrotanshinoneⅠ | 45.04327919 | 0.36015 |
| 46 | MOL007105 | epidanshenspiroketallactone | 68.27315929 | 0.30549 |
| 47 | MOL007107 | C09092 | 36.06948986 | 0.2474 |
| 48 | MOL007108 | isocryptotanshi-none | 54.98193246 | 0.39449 |
| 49 | MOL007111 | Isotanshinone II | 49.91602574 | 0.39674 |
| 50 | MOL007115 | manool | 45.04431636 | 0.20208 |
| 51 | MOL007118 | microstegiol | 39.61229457 | 0.27734 |
| 52 | MOL007119 | miltionone Ⅰ | 49.68439433 | 0.32125 |
| 53 | MOL007120 | miltionone Ⅱ | 71.02970321 | 0.43711 |
| 54 | MOL007121 | miltipolone | 36.55611206 | 0.36803 |
| 55 | MOL007122 | Miltirone | 38.75698635 | 0.25418 |
| 56 | MOL007123 | miltirone Ⅱ | 44.95106648 | 0.23537 |
| 57 | MOL007124 | neocryptotanshinone ii | 39.46299114 | 0.23157 |
| 58 | MOL007125 | neocryptotanshinone | 52.48799701 | 0.32306 |
| 59 | MOL007127 | 1-methyl-8,9-dihydro-7H-naphtho[5,6-g]benzofuran-6,10,11-trione | 34.72082213 | 0.36634 |
| 60 | MOL007130 | prolithospermic acid | 64.37096207 | 0.31017 |
| 61 | MOL007132 | (2R)-3-(3,4-dihydroxyphenyl)-2-[(Z)-3-(3,4-dihydroxyphenyl)acryloyl]oxy-propionic acid | 109.3805241 | 0.35119 |
| 62 | MOL007140 | (Z)-3-[2-[(E)-2-(3,4-dihydroxyphenyl)vinyl]-3,4-dihydroxy-phenyl]acrylic acid | 88.53602101 | 0.25869 |
| 63 | MOL007141 | salvianolic acid g | 45.56485578 | 0.60602 |
| 64 | MOL007142 | salvianolic acid j | 43.37604991 | 0.72497 |
| 65 | MOL007143 | salvilenone Ⅰ | 32.43470856 | 0.22895 |
| 66 | MOL007145 | salviolone | 31.72415039 | 0.23568 |
| 67 | MOL007149 | NSC 122421 | 34.49292309 | 0.27645 |
| 68 | MOL007150 | (6S)-6-hydroxy-1-methyl-6-methylol-8,9-dihydro-7H-naphtho[8,7-g]benzofuran-10,11-quinone | 75.38587847 | 0.4551 |
| 69 | MOL007151 | Tanshindiol B | 42.66581049 | 0.45303 |
| 70 | MOL007152 | Przewaquinone E | 42.85485204 | 0.45301 |
| 71 | MOL007154 | tanshinone iia | 49.88730004 | 0.39781 |
| 72 | MOL007155 | (6S)-6-(hydroxymethyl)-1,6-dimethyl-8,9-dihydro-7H-naphtho[8,7-g]benzofuran-10,11-dione | 65.25893771 | 0.44871 |
| 73 | MOL007156 | tanshinone Ⅵ | 45.63730602 | 0.29549 |
| 74 | MOL000359 | sitosterol | 36.91390583 | 0.7512 |
| 75 | MOL002058 | 40957-99-1 | 57.20447445 | 0.61872 |
| 76 | MOL000211 | Mairin | 55.37707338 | 0.7761 |
| 77 | MOL000422 | kaempferol | 41.88224954 | 0.24066 |
| 78 | MOL004367 | olivil | 62.22859563 | 0.40642 |
| 79 | MOL000443 | Erythraline | 49.17676997 | 0.55031 |
| 80 | MOL005922 | Acanthoside B | 43.35308428 | 0.76689 |
| 81 | MOL006709 | AIDS214634 | 92.42724327 | 0.54906 |
| 82 | MOL000073 | ent-Epicatechin | 48.95984114 | 0.24162 |
| 83 | MOL007563 | Yangambin | 57.52544673 | 0.80801 |
| 84 | MOL009007 | Eucommin A | 30.51335769 | 0.84815 |
| 85 | MOL009009 | (+)-medioresinol | 87.18865939 | 0.61875 |
| 86 | MOL009015 | (-)-Tabernemontanine | 58.66917753 | 0.60719 |
| 87 | MOL009027 | Cyclopamine | 55.42172002 | 0.82136 |
| 88 | MOL009029 | Dehydrodiconiferyl alcohol 4,gamma'-di-O-beta-D-glucopyanoside_qt | 51.44225525 | 0.39505 |
| 89 | MOL009030 | Dehydrodieugenol | 30.10301535 | 0.23906 |
| 90 | MOL009031 | Cinchonan-9-al, 6'-methoxy-, (9R)- | 68.2150183 | 0.40098 |
| 91 | MOL009038 | GBGB | 45.57744755 | 0.82668 |
| 92 | MOL009042 | Helenalin | 77.01051009 | 0.19049 |
| 93 | MOL009047 | (+)-Eudesmin | 33.28664314 | 0.62037 |
| 94 | MOL009053 | 4-[(2S,3R)-5-[(E)-3-hydroxyprop-1-enyl]-7-methoxy-3-methylol-2,3-dihydrobenzofuran-2-yl]-2-methoxy-phenol | 50.75513649 | 0.3948 |
| 95 | MOL009055 | hirsutin_qt | 49.81498455 | 0.37152 |
| 96 | MOL009057 | liriodendrin_qt | 53.13736321 | 0.79961 |
| 97 | MOL002773 | beta-carotene | 37.18433337 | 0.58358 |
| 98 | MOL008240 | (E)-3-[4-[(1R,2R)-2-hydroxy-2-(4-hydroxy-3-methoxy-phenyl)-1-methylol-ethoxy]-3-methoxy-phenyl]acrolein | 56.31706329 | 0.36095 |
| 99 | MOL011604 | Syringetin | 36.82222268 | 0.37414 |
| 100 | MOL003629 | Daidzein-4,7-diglucoside | 47.27483263 | 0.67419 |
| 101 | MOL000433 | FA | 68.96043622 | 0.7057 |
| 102 | MOL004798 | delphinidin | 40.63497529 | 0.27763 |
| 103 | MOL005030 | gondoic acid | 30.70294255 | 0.19743 |
| 104 | MOL009706 | Pramoxine | 49.08061545 | 0.19245 |
| 105 | MOL009711 | Cycloartenone | 40.57046636 | 0.78757 |
| 106 | MOL009722 | L-Folinic acid | 31.78630161 | 0.7441 |
| 107 | MOL009729 | methyl (E)-nonadec-10-enoate | 30.66196616 | 0.19404 |
| 108 | MOL009733 | methyl 12-oxooctadec-9-enoate | 37.44984288 | 0.19152 |
| 109 | MOL009735 | N-(p-Hydroxyphenethyl) actinidine | 62.15985604 | 0.19266 |
| 110 | MOL009740 | Sapogenol C | 40.73521379 | 0.76516 |
| 111 | MOL001689 | acacetin | 34.97357273 | 0.24082 |
| 112 | MOL004355 | Spinasterol | 42.97936552 | 0.75534 |
| 113 | MOL004580 | cis-Dihydroquercetin | 66.43699795 | 0.27344 |
| 114 | MOL005996 | 2-O-methyl-3―O-β-D-glucopyranosyl platycogenate A | 45.15023343 | 0.25226 |
| 115 | MOL006026 | dimethyl 2-O-methyl-3-O-a-D-glucopyranosyl platycogenate A | 39.20757664 | 0.25368 |
| 116 | MOL006070 | robinin | 39.84373106 | 0.70731 |
| 117 | MOL002879 | Diop | 43.59332547 | 0.39247 |
| 118 | MOL003648 | Inermin | 65.83093145 | 0.53754 |
| 119 | MOL004492 | Chrysanthemaxanthin | 38.72398115 | 0.58352 |
| 120 | MOL005308 | Aposiopolamine | 66.64690713 | 0.21999 |
| 121 | MOL005314 | Celabenzine | 101.8825954 | 0.48772 |
| 122 | MOL005317 | Deoxyharringtonine | 39.27443988 | 0.8116 |
| 123 | MOL005318 | Dianthramine | 40.44641187 | 0.19676 |
| 124 | MOL005320 | arachidonate | 45.57324991 | 0.20491 |
| 125 | MOL005321 | Frutinone A | 65.9037307 | 0.34184 |
| 126 | MOL005344 | ginsenoside rh2 | 36.31951162 | 0.55868 |
| 127 | MOL005348 | Ginsenoside-Rh4_qt | 31.11214828 | 0.77829 |
| 128 | MOL005356 | Girinimbin | 61.21530251 | 0.31484 |
| 129 | MOL005357 | Gomisin B | 31.99042428 | 0.82858 |
| 130 | MOL005360 | malkangunin | 57.71384384 | 0.62642 |
| 131 | MOL005376 | Panaxadiol | 33.0879606 | 0.79404 |
| 132 | MOL005384 | suchilactone | 57.51882425 | 0.55573 |
| 133 | MOL005399 | alexandrin_qt | 36.91390583 | 0.75268 |
| 134 | MOL005401 | ginsenoside Rg5_qt | 39.56307142 | 0.78506 |
| 135 | MOL000787 | Fumarine | 59.26250458 | 0.82694 |
| 136 | MOL001559 | piperlonguminine | 30.71142726 | 0.1802 |
| 137 | MOL001736 | (-)-taxifolin | 60.50621692 | 0.27342 |
| 138 | MOL000310 | Denudatin B | 61.47237606 | 0.37838 |
| 139 | MOL000322 | Kadsurenone | 54.72301284 | 0.37829 |
| 140 | MOL005429 | hancinol | 64.0132681 | 0.37314 |
| 141 | MOL005430 | hancinone C | 59.04593444 | 0.38965 |
| 142 | MOL005435 | 24-Methylcholest-5-enyl-3belta-O-glucopyranoside_qt | 37.57681789 | 0.71653 |
| 143 | MOL005438 | campesterol | 37.57681789 | 0.71488 |
| 144 | MOL005440 | Isofucosterol | 43.77639556 | 0.7576 |
| 145 | MOL005458 | Dioscoreside C_qt | 36.38228738 | 0.87051 |
| 146 | MOL000546 | diosgenin | 80.87792491 | 0.80979 |
| 147 | MOL005461 | Doradexanthin | 38.15575048 | 0.53662 |
| 148 | MOL005463 | Methylcimicifugoside_qt | 31.69348525 | 0.23655 |
| 149 | MOL005465 | AIDS180907 | 45.32835933 | 0.77301 |
| 150 | MOL000953 | CLR | 37.87389754 | 0.67677 |
| 151 | MOL013117 | 4,7-Dihydroxy-5-methoxyl-6-methyl-8-formyl-flavan | 37.03309421 | 0.27872 |
| 152 | MOL013118 | Neoastilbin | 40.54338449 | 0.7363 |
| 153 | MOL013119 | Enhydrin | 40.56299369 | 0.73615 |
| 154 | MOL013129 | (2R,3R)-2-(3,5-dihydroxyphenyl)-3,5,7-trihydroxychroman-4-one | 63.1727816 | 0.27209 |
| 155 | MOL004328 | naringenin | 59.29389773 | 0.21128 |
| 156 | MOL004567 | isoengelitin | 34.65053943 | 0.69535 |
| 157 | MOL004575 | astilbin | 36.46195914 | 0.73628 |
| 158 | MOL004576 | taxifolin | 57.84156034 | 0.27345 |
| 159 | MOL011394 | (2R,3S,4S,5R,6R)-2-(hydroxymethyl)-6-[[(3S,5R,8R,9R,10R,12R,13R,14R,17S)-12-hydroxy-4,4,8,10,14-pentamethyl-17-[(2S)-6-methyl-2-[(2S,3R,4S,5S,6R)-3,4,5-trihydroxy-6-(hydroxymethyl)oxan-2-yl]oxyhept-5-en-2-yl]-2,3,5,6,7,9,11,12,13,15,16,17-dodecahydro-1H-c | 36.43174722 | 0.25334 |
| 160 | MOL011434 | polyacetylene PQ-2 | 36.74007174 | 0.19512 |
| 161 | MOL011435 | PQ-2 | 36.74007174 | 0.19434 |
| 162 | MOL011442 | (8S,9S,10R,13R,14S,17R)-17-[(1R,4R)-4-ethyl-1,5-dimethylhexyl]-10,13-dimethyl-1,2,8,9,11,12,14,15,16,17-decahydrocyclopenta[a]phenanthren-7-one | 43.86720862 | 0.74604 |
| 163 | MOL011455 | 20-Hexadecanoylingenol | 32.69866335 | 0.65347 |
| 164 | MOL006774 | stigmast-7-enol | 37.42312067 | 0.75133 |
| 165 | MOL006980 | papaverine | 64.04275409 | 0.37825 |
| 166 | MOL008173 | daucosterol_qt | 36.91390583 | 0.75316 |
| 167 | MOL008397 | Daturilin | 50.36513472 | 0.76801 |
| 168 | MOL001418 | galeopsin | 61.01547548 | 0.3753 |
| 169 | MOL001420 | ZINC04073977 | 37.99618556 | 0.75755 |
| 170 | MOL001421 | preleoheterin | 85.97258793 | 0.33044 |
| 171 | MOL001422 | iso-preleoheterin | 66.288776 | 0.33032 |
| 172 | MOL001439 | arachidonic acid | 45.57324991 | 0.20409 |
| 173 | MOL000354 | isorhamnetin | 49.60437705 | 0.306 |
| 174 | MOL000830 | Alisol B | 34.47307308 | 0.81706 |
| 175 | MOL000831 | Alisol B monoacetate | 35.57623621 | 0.80629 |
| 176 | MOL000832 | alisol,b,23-acetate | 32.51621601 | 0.81841 |
| 177 | MOL000849 | 16β-methoxyalisol B monoacetate | 32.42724106 | 0.7679 |
| 178 | MOL000853 | alisol B | 36.76038067 | 0.81993 |
| 179 | MOL000854 | alisol C | 32.70016921 | 0.81507 |
| 180 | MOL000856 | alisol C monoacetate | 33.06358947 | 0.82763 |
| 181 | MOL002464 | 1-Monolinolein | 37.17662836 | 0.30249 |
| 182 | MOL000862 | [(1S,3R)-1-[(2R)-3,3-dimethyloxiran-2-yl]-3-[(5R,8S,9S,10S,11S,14R)-11-hydroxy-4,4,8,10,14-pentamethyl-3-oxo-1,2,5,6,7,9,11,12,15,16-decahydrocyclopenta[a]phenanthren-17-yl]butyl] acetate | 35.57623621 | 0.80765 |

**Table S3. 154 Active ingredients and 255 Targets**

| **Herb name** | **MolId** | **MolName** | **Target** | **Symbol** |
| --- | --- | --- | --- | --- |
| Baihuasheshecao | MOL001659 | Poriferasterol | Progesterone receptor | PGR |
| Baihuasheshecao | MOL001659 | Poriferasterol | Mineralocorticoid receptor | NR3C2 |
| Baihuasheshecao | MOL001670 | 2-methoxy-3-methyl-9,10-anthraquinone | Prostaglandin G/H synthase 1 | PTGS1 |
| Baihuasheshecao | MOL001670 | 2-methoxy-3-methyl-9,10-anthraquinone | D(1A) dopamine receptor | DRD1 |
| Baihuasheshecao | MOL001670 | 2-methoxy-3-methyl-9,10-anthraquinone | Muscarinic acetylcholine receptor M3 | CHRM3 |
| Baihuasheshecao | MOL001670 | 2-methoxy-3-methyl-9,10-anthraquinone | Muscarinic acetylcholine receptor M1 | CHRM1 |
| Baihuasheshecao | MOL001670 | 2-methoxy-3-methyl-9,10-anthraquinone | Estrogen receptor | ESR1 |
| Baihuasheshecao | MOL001670 | 2-methoxy-3-methyl-9,10-anthraquinone | Sodium channel protein type 5 subunit alpha | SCN5A |
| Baihuasheshecao | MOL001670 | 2-methoxy-3-methyl-9,10-anthraquinone | Muscarinic acetylcholine receptor M5 | CHRM5 |
| Baihuasheshecao | MOL001670 | 2-methoxy-3-methyl-9,10-anthraquinone | Prostaglandin G/H synthase 2 | PTGS2 |
| Baihuasheshecao | MOL001670 | 2-methoxy-3-methyl-9,10-anthraquinone | Muscarinic acetylcholine receptor M4 | CHRM4 |
| Baihuasheshecao | MOL001670 | 2-methoxy-3-methyl-9,10-anthraquinone | Retinoic acid receptor RXR-alpha | RXRA |
| Baihuasheshecao | MOL001670 | 2-methoxy-3-methyl-9,10-anthraquinone | Delta-type opioid receptor | OPRD1 |
| Baihuasheshecao | MOL001670 | 2-methoxy-3-methyl-9,10-anthraquinone | cGMP-inhibited 3',5'-cyclic phosphodiesterase A | PDE3A |
| Baihuasheshecao | MOL001670 | 2-methoxy-3-methyl-9,10-anthraquinone | Histamine H1 receptor | HRH1 |
| Baihuasheshecao | MOL001670 | 2-methoxy-3-methyl-9,10-anthraquinone | Sodium-dependent noradrenaline transporter | SLC6A2 |
| Baihuasheshecao | MOL001670 | 2-methoxy-3-methyl-9,10-anthraquinone | Alpha-1A adrenergic receptor | ADRA1A |
| Baihuasheshecao | MOL001670 | 2-methoxy-3-methyl-9,10-anthraquinone | Muscarinic acetylcholine receptor M2 | CHRM2 |
| Baihuasheshecao | MOL001670 | 2-methoxy-3-methyl-9,10-anthraquinone | Alpha-1B adrenergic receptor | ADRA1B |
| Baihuasheshecao | MOL001670 | 2-methoxy-3-methyl-9,10-anthraquinone | Sodium-dependent dopamine transporter | SLC6A3 |
| Baihuasheshecao | MOL001670 | 2-methoxy-3-methyl-9,10-anthraquinone | Beta-2 adrenergic receptor | ADRB2 |
| Baihuasheshecao | MOL001670 | 2-methoxy-3-methyl-9,10-anthraquinone | Alpha-1D adrenergic receptor | ADRA1D |
| Baihuasheshecao | MOL001670 | 2-methoxy-3-methyl-9,10-anthraquinone | Sodium-dependent serotonin transporter | SLC6A4 |
| Baihuasheshecao | MOL001670 | 2-methoxy-3-methyl-9,10-anthraquinone | Mu-type opioid receptor | OPRM1 |
| Baihuasheshecao | MOL001670 | 2-methoxy-3-methyl-9,10-anthraquinone | Heat shock protein HSP 90-alpha | HSP90AA1 |
| Baihuasheshecao | MOL001670 | 2-methoxy-3-methyl-9,10-anthraquinone | Neuronal acetylcholine receptor subunit alpha-7 | CHRNA7 |
| Baihuasheshecao | MOL001670 | 2-methoxy-3-methyl-9,10-anthraquinone | cAMP-dependent protein kinase catalytic subunit alpha | PRKACA |
| Baihuasheshecao | MOL001670 | 2-methoxy-3-methyl-9,10-anthraquinone | Nuclear receptor coactivator 2 | NCOA2 |
| Baihuasheshecao | MOL001670 | 2-methoxy-3-methyl-9,10-anthraquinone | cAMP-dependent protein kinase inhibitor alpha | PKIA |
| Baihuasheshecao | MOL000449 | Stigmasterol | Progesterone receptor | PGR |
| Baihuasheshecao | MOL000449 | Stigmasterol | Mineralocorticoid receptor | NR3C2 |
| Baihuasheshecao | MOL000449 | Stigmasterol | Nuclear receptor coactivator 2 | NCOA2 |
| Baihuasheshecao | MOL000449 | Stigmasterol | Retinoic acid receptor RXR-alpha | RXRA |
| Baihuasheshecao | MOL000449 | Stigmasterol | Nuclear receptor coactivator 1 | NCOA1 |
| Baihuasheshecao | MOL000449 | Stigmasterol | Prostaglandin G/H synthase 1 | PTGS1 |
| Baihuasheshecao | MOL000449 | Stigmasterol | Prostaglandin G/H synthase 2 | PTGS2 |
| Baihuasheshecao | MOL000449 | Stigmasterol | Alpha-2A adrenergic receptor | ADRA2A |
| Baihuasheshecao | MOL000449 | Stigmasterol | Sodium-dependent noradrenaline transporter | SLC6A2 |
| Baihuasheshecao | MOL000449 | Stigmasterol | Sodium-dependent dopamine transporter | SLC6A3 |
| Baihuasheshecao | MOL000449 | Stigmasterol | Beta-2 adrenergic receptor | ADRB2 |
| Baihuasheshecao | MOL000449 | Stigmasterol | Urokinase-type plasminogen activator | PLAU |
| Baihuasheshecao | MOL000449 | Stigmasterol | Leukotriene A-4 hydrolase | LTA4H |
| Baihuasheshecao | MOL000449 | Stigmasterol | Amine oxidase [flavin-containing] B | MAOB |
| Baihuasheshecao | MOL000449 | Stigmasterol | Amine oxidase [flavin-containing] A | MAOA |
| Baihuasheshecao | MOL000449 | Stigmasterol | cAMP-dependent protein kinase catalytic subunit alpha | PRKACA |
| Baihuasheshecao | MOL000449 | Stigmasterol | Chymotrypsinogen B | CTRB1 |
| Baihuasheshecao | MOL000449 | Stigmasterol | Muscarinic acetylcholine receptor M3 | CHRM3 |
| Baihuasheshecao | MOL000449 | Stigmasterol | Muscarinic acetylcholine receptor M1 | CHRM1 |
| Baihuasheshecao | MOL000449 | Stigmasterol | Beta-1 adrenergic receptor | ADRB1 |
| Baihuasheshecao | MOL000449 | Stigmasterol | Sodium channel protein type 5 subunit alpha | SCN5A |
| Baihuasheshecao | MOL000449 | Stigmasterol | Alpha-1A adrenergic receptor | ADRA1A |
| Baihuasheshecao | MOL000449 | Stigmasterol | Muscarinic acetylcholine receptor M2 | CHRM2 |
| Baihuasheshecao | MOL000449 | Stigmasterol | Alpha-1B adrenergic receptor | ADRA1B |
| Baihuasheshecao | MOL000449 | Stigmasterol | Neuronal acetylcholine receptor subunit alpha-7 | CHRNA7 |
| Baihuasheshecao | MOL000358 | beta-sitosterol | Progesterone receptor | PGR |
| Baihuasheshecao | MOL000358 | beta-sitosterol | Nuclear receptor coactivator 2 | NCOA2 |
| Baihuasheshecao | MOL000358 | beta-sitosterol | Prostaglandin G/H synthase 1 | PTGS1 |
| Baihuasheshecao | MOL000358 | beta-sitosterol | Prostaglandin G/H synthase 2 | PTGS2 |
| Baihuasheshecao | MOL000358 | beta-sitosterol | Heat shock protein HSP 90-alpha | HSP90AA1 |
| Baihuasheshecao | MOL000358 | beta-sitosterol | Potassium voltage-gated channel subfamily H member 2 | KCNH2 |
| Baihuasheshecao | MOL000358 | beta-sitosterol | cAMP-dependent protein kinase catalytic subunit alpha | PRKACA |
| Baihuasheshecao | MOL000358 | beta-sitosterol | D(1A) dopamine receptor | DRD1 |
| Baihuasheshecao | MOL000358 | beta-sitosterol | Muscarinic acetylcholine receptor M3 | CHRM3 |
| Baihuasheshecao | MOL000358 | beta-sitosterol | Muscarinic acetylcholine receptor M1 | CHRM1 |
| Baihuasheshecao | MOL000358 | beta-sitosterol | Sodium channel protein type 5 subunit alpha | SCN5A |
| Baihuasheshecao | MOL000358 | beta-sitosterol | Muscarinic acetylcholine receptor M4 | CHRM4 |
| Baihuasheshecao | MOL000358 | beta-sitosterol | cGMP-inhibited 3',5'-cyclic phosphodiesterase A | PDE3A |
| Baihuasheshecao | MOL000358 | beta-sitosterol | Alpha-1A adrenergic receptor | ADRA1A |
| Baihuasheshecao | MOL000358 | beta-sitosterol | Muscarinic acetylcholine receptor M2 | CHRM2 |
| Baihuasheshecao | MOL000358 | beta-sitosterol | Alpha-1B adrenergic receptor | ADRA1B |
| Baihuasheshecao | MOL000358 | beta-sitosterol | Beta-2 adrenergic receptor | ADRB2 |
| Baihuasheshecao | MOL000358 | beta-sitosterol | Neuronal acetylcholine receptor subunit alpha-2 | CHRNA2 |
| Baihuasheshecao | MOL000358 | beta-sitosterol | Sodium-dependent serotonin transporter | SLC6A4 |
| Baihuasheshecao | MOL000358 | beta-sitosterol | Mu-type opioid receptor | OPRM1 |
| Baihuasheshecao | MOL000358 | beta-sitosterol | Neuronal acetylcholine receptor subunit alpha-7 | CHRNA7 |
| Baihuasheshecao | MOL000358 | beta-sitosterol | Apoptosis regulator Bcl-2 | BCL2 |
| Baihuasheshecao | MOL000358 | beta-sitosterol | Apoptosis regulator BAX | BAX |
| Baihuasheshecao | MOL000358 | beta-sitosterol | Caspase-9 | CASP9 |
| Baihuasheshecao | MOL000358 | beta-sitosterol | Transcription factor AP-1 | JUN |
| Baihuasheshecao | MOL000358 | beta-sitosterol | Caspase-3 | CASP3 |
| Baihuasheshecao | MOL000358 | beta-sitosterol | Caspase-8 | CASP8 |
| Baihuasheshecao | MOL000358 | beta-sitosterol | Protein kinase C alpha type | PRKCA |
| Baihuasheshecao | MOL000358 | beta-sitosterol | Serum paraoxonase/arylesterase 1 | PON1 |
| Baihuasheshecao | MOL000358 | beta-sitosterol | Microtubule-associated protein 2 | MAP2 |
| Baihuasheshecao | MOL000098 | quercetin | Prostaglandin G/H synthase 1 | PTGS1 |
| Baihuasheshecao | MOL000098 | quercetin | Androgen receptor | AR |
| Baihuasheshecao | MOL000098 | quercetin | Peroxisome proliferator-activated receptor gamma | PPARG |
| Baihuasheshecao | MOL000098 | quercetin | Prostaglandin G/H synthase 2 | PTGS2 |
| Baihuasheshecao | MOL000098 | quercetin | Heat shock protein HSP 90-alpha | HSP90AA1 |
| Baihuasheshecao | MOL000098 | quercetin | Nuclear receptor coactivator 2 | NCOA2 |
| Baihuasheshecao | MOL000098 | quercetin | Dipeptidyl peptidase 4 | DPP4 |
| Baihuasheshecao | MOL000098 | quercetin | Trypsin-1 | PRSS1 |
| Baihuasheshecao | MOL000098 | quercetin | DNA topoisomerase 2-alpha | TOP2A |
| Baihuasheshecao | MOL000098 | quercetin | Prothrombin | F2 |
| Baihuasheshecao | MOL000098 | quercetin | Potassium voltage-gated channel subfamily H member 2 | KCNH2 |
| Baihuasheshecao | MOL000098 | quercetin | Sodium channel protein type 5 subunit alpha | SCN5A |
| Baihuasheshecao | MOL000098 | quercetin | Coagulation factor X | F10 |
| Baihuasheshecao | MOL000098 | quercetin | Beta-2 adrenergic receptor | ADRB2 |
| Baihuasheshecao | MOL000098 | quercetin | Stromelysin-1 | MMP3 |
| Baihuasheshecao | MOL000098 | quercetin | cAMP-dependent protein kinase catalytic subunit alpha | PRKACA |
| Baihuasheshecao | MOL000098 | quercetin | Coagulation factor VII | F7 |
| Baihuasheshecao | MOL000098 | quercetin | Retinoic acid receptor RXR-alpha | RXRA |
| Baihuasheshecao | MOL000098 | quercetin | Acetylcholinesterase | ACHE |
| Baihuasheshecao | MOL000098 | quercetin | Amine oxidase [flavin-containing] B | MAOB |
| Baihuasheshecao | MOL000098 | quercetin | Transcription factor p65 | RELA |
| Baihuasheshecao | MOL000098 | quercetin | Epidermal growth factor receptor | EGFR |
| Baihuasheshecao | MOL000098 | quercetin | RAC-alpha serine/threonine-protein kinase | AKT1 |
| Baihuasheshecao | MOL000098 | quercetin | G1/S-specific cyclin-D1 | CCND1 |
| Baihuasheshecao | MOL000098 | quercetin | Apoptosis regulator Bcl-2 | BCL2 |
| Baihuasheshecao | MOL000098 | quercetin | Bcl-2-like protein 1 | BCL2L1 |
| Baihuasheshecao | MOL000098 | quercetin | Proto-oncogene c-Fos | FOS |
| Baihuasheshecao | MOL000098 | quercetin | Cyclin-dependent kinase inhibitor 1 | CDKN1A |
| Baihuasheshecao | MOL000098 | quercetin | Eukaryotic translation initiation factor 6 | EIF6 |
| Baihuasheshecao | MOL000098 | quercetin | Apoptosis regulator BAX | BAX |
| Baihuasheshecao | MOL000098 | quercetin | Caspase-9 | CASP9 |
| Baihuasheshecao | MOL000098 | quercetin | Urokinase-type plasminogen activator | PLAU |
| Baihuasheshecao | MOL000098 | quercetin | 72 kDa type IV collagenase | MMP2 |
| Baihuasheshecao | MOL000098 | quercetin | Matrix metalloproteinase-9 | MMP9 |
| Baihuasheshecao | MOL000098 | quercetin | Mitogen-activated protein kinase 1 | MAPK1 |
| Baihuasheshecao | MOL000098 | quercetin | Interleukin-10 | IL10 |
| Baihuasheshecao | MOL000098 | quercetin | Retinoblastoma-associated protein | RB1 |
| Baihuasheshecao | MOL000098 | quercetin | Tumor necrosis factor | TNF |
| Baihuasheshecao | MOL000098 | quercetin | Transcription factor AP-1 | JUN |
| Baihuasheshecao | MOL000098 | quercetin | Interleukin-6 | IL6 |
| Baihuasheshecao | MOL000098 | quercetin | Activator of 90 kDa heat shock protein ATPase homolog 1 | AHSA1 |
| Baihuasheshecao | MOL000098 | quercetin | Caspase-3 | CASP3 |
| Baihuasheshecao | MOL000098 | quercetin | Cellular tumor antigen p53 | TP53 |
| Baihuasheshecao | MOL000098 | quercetin | ETS domain-containing protein Elk-1 | ELK1 |
| Baihuasheshecao | MOL000098 | quercetin | NF-kappa-B inhibitor alpha | NFKBIA |
| Baihuasheshecao | MOL000098 | quercetin | Ornithine decarboxylase | ODC1 |
| Baihuasheshecao | MOL000098 | quercetin | Caspase-8 | CASP8 |
| Baihuasheshecao | MOL000098 | quercetin | DNA topoisomerase 1 | TOP1 |
| Baihuasheshecao | MOL000098 | quercetin | RAF proto-oncogene serine/threonine-protein kinase | RAF1 |
| Baihuasheshecao | MOL000098 | quercetin | Superoxide dismutase [Cu-Zn] | SOD1 |
| Baihuasheshecao | MOL000098 | quercetin | Protein kinase C alpha type | PRKCA |
| Baihuasheshecao | MOL000098 | quercetin | Interstitial collagenase | MMP1 |
| Baihuasheshecao | MOL000098 | quercetin | Hypoxia-inducible factor 1-alpha | HIF1A |
| Baihuasheshecao | MOL000098 | quercetin | Signal transducer and activator of transcription 1-alpha/beta | STAT1 |
| Baihuasheshecao | MOL000098 | quercetin | Protein CBFA2T1 | RUNX1T1 |
| Baihuasheshecao | MOL000098 | quercetin | Receptor tyrosine-protein kinase erbB-2 | ERBB2 |
| Baihuasheshecao | MOL000098 | quercetin | Peroxisome proliferator-activated receptor gamma | PPARG |
| Baihuasheshecao | MOL000098 | quercetin | Acetyl-CoA carboxylase 1 | ACACA |
| Baihuasheshecao | MOL000098 | quercetin | Heme oxygenase 1 | HMOX1 |
| Baihuasheshecao | MOL000098 | quercetin | Cytochrome P450 3A4 | CYP3A4 |
| Baihuasheshecao | MOL000098 | quercetin | Caveolin-1 | CAV1 |
| Baihuasheshecao | MOL000098 | quercetin | Myc proto-oncogene protein | MYC |
| Baihuasheshecao | MOL000098 | quercetin | Tissue factor | F3 |
| Baihuasheshecao | MOL000098 | quercetin | Gap junction alpha-1 protein | GJA1 |
| Baihuasheshecao | MOL000098 | quercetin | Cytochrome P450 1A1 | CYP1A1 |
| Baihuasheshecao | MOL000098 | quercetin | Intercellular adhesion molecule 1 | ICAM1 |
| Baihuasheshecao | MOL000098 | quercetin | Interleukin-1 beta | IL1B |
| Baihuasheshecao | MOL000098 | quercetin | E-selectin | SELE |
| Baihuasheshecao | MOL000098 | quercetin | Vascular cell adhesion protein 1 | VCAM1 |
| Baihuasheshecao | MOL000098 | quercetin | Interleukin-8 | CXCL8 |
| Baihuasheshecao | MOL000098 | quercetin | Protein kinase C beta type | PRKCB |
| Baihuasheshecao | MOL000098 | quercetin | Baculoviral IAP repeat-containing protein 5 | BIRC5 |
| Baihuasheshecao | MOL000098 | quercetin | Dual oxidase 2 | DUOX2 |
| Baihuasheshecao | MOL000098 | quercetin | Nitric oxide synthase, endothelial | NOS3 |
| Baihuasheshecao | MOL000098 | quercetin | Heat shock protein beta-1 | HSPB1 |
| Baihuasheshecao | MOL000098 | quercetin | Maltase-glucoamylase, intestinal | MGAM |
| Baihuasheshecao | MOL000098 | quercetin | Interleukin-2 | IL2 |
| Baihuasheshecao | MOL000098 | quercetin | Nuclear receptor subfamily 1 group I member 2 | NR1I2 |
| Baihuasheshecao | MOL000098 | quercetin | Cytochrome P450 1B1 | CYP1B1 |
| Baihuasheshecao | MOL000098 | quercetin | G2/mitotic-specific cyclin-B1 | CCNB1 |
| Baihuasheshecao | MOL000098 | quercetin | Tissue-type plasminogen activator | PLAT |
| Baihuasheshecao | MOL000098 | quercetin | Thrombomodulin | THBD |
| Baihuasheshecao | MOL000098 | quercetin | Plasminogen activator inhibitor 1 | SERPINE1 |
| Baihuasheshecao | MOL000098 | quercetin | Interferon gamma | IFNG |
| Baihuasheshecao | MOL000098 | quercetin | Arachidonate 5-lipoxygenase | ALOX5 |
| Baihuasheshecao | MOL000098 | quercetin | Interleukin-1 alpha | IL1A |
| Baihuasheshecao | MOL000098 | quercetin | Myeloperoxidase | MPO |
| Baihuasheshecao | MOL000098 | quercetin | DNA topoisomerase 2-alpha | TOP2A |
| Baihuasheshecao | MOL000098 | quercetin | Neutrophil cytosol factor 1 | NCF1 |
| Baihuasheshecao | MOL000098 | quercetin | Hyaluronan synthase 2 | HAS2 |
| Baihuasheshecao | MOL000098 | quercetin | Nuclear factor erythroid 2-related factor 2 | NFE2L2 |
| Baihuasheshecao | MOL000098 | quercetin | NAD(P)H dehydrogenase [quinone] 1 | NQO1 |
| Baihuasheshecao | MOL000098 | quercetin | Poly [ADP-ribose] polymerase 1 | PARP1 |
| Baihuasheshecao | MOL000098 | quercetin | Aryl hydrocarbon receptor | AHR |
| Baihuasheshecao | MOL000098 | quercetin | 26S proteasome non-ATPase regulatory subunit 3 | PSMD3 |
| Baihuasheshecao | MOL000098 | quercetin | Solute carrier family 2, facilitated glucose transporter member 4 | SLC2A4 |
| Baihuasheshecao | MOL000098 | quercetin | Collagen alpha-1(III) chain | COL3A1 |
| Baihuasheshecao | MOL000098 | quercetin | C-X-C motif chemokine 11 | CXCL11 |
| Baihuasheshecao | MOL000098 | quercetin | C-X-C motif chemokine 2 | CXCL2 |
| Baihuasheshecao | MOL000098 | quercetin | DDB1- and CUL4-associated factor 5 | DCAF5 |
| Baihuasheshecao | MOL000098 | quercetin | Nuclear receptor subfamily 1 group I member 3 | NR1I3 |
| Baihuasheshecao | MOL000098 | quercetin | Serine/threonine-protein kinase Chk2 | CHEK2 |
| Baihuasheshecao | MOL000098 | quercetin | Insulin receptor | INSR |
| Baihuasheshecao | MOL000098 | quercetin | Claudin-4 | CLDN4 |
| Baihuasheshecao | MOL000098 | quercetin | Peroxisome proliferator-activated receptor alpha | PPARA |
| Baihuasheshecao | MOL000098 | quercetin | Peroxisome proliferator-activated receptor delta | PPARD |
| Baihuasheshecao | MOL000098 | quercetin | Heat shock factor protein 1 | HSF1 |
| Baihuasheshecao | MOL000098 | quercetin | C-reactive protein | CRP |
| Baihuasheshecao | MOL000098 | quercetin | C-X-C motif chemokine 10 | CXCL10 |
| Baihuasheshecao | MOL000098 | quercetin | Inhibitor of nuclear factor kappa-B kinase subunit alpha | CHUK |
| Baihuasheshecao | MOL000098 | quercetin | Osteopontin | SPP1 |
| Baihuasheshecao | MOL000098 | quercetin | Runt-related transcription factor 2 | RUNX2 |
| Baihuasheshecao | MOL000098 | quercetin | Ras association domain-containing protein 1 | RASSF1 |
| Baihuasheshecao | MOL000098 | quercetin | Transcription factor E2F1 | E2F1 |
| Baihuasheshecao | MOL000098 | quercetin | Transcription factor E2F2 | E2F2 |
| Baihuasheshecao | MOL000098 | quercetin | Prostatic acid phosphatase | ACP3 |
| Baihuasheshecao | MOL000098 | quercetin | Cathepsin D | CTSD |
| Baihuasheshecao | MOL000098 | quercetin | Insulin-like growth factor-binding protein 3 | IGFBP3 |
| Baihuasheshecao | MOL000098 | quercetin | Insulin-like growth factor II | IGF2 |
| Baihuasheshecao | MOL000098 | quercetin | CD40 ligand | CD40LG |
| Baihuasheshecao | MOL000098 | quercetin | Interferon regulatory factor 1 | IRF1 |
| Baihuasheshecao | MOL000098 | quercetin | Receptor tyrosine-protein kinase erbB-3 | ERBB3 |
| Baihuasheshecao | MOL000098 | quercetin | Serum paraoxonase/arylesterase 1 | PON1 |
| Baihuasheshecao | MOL000098 | quercetin | Type I iodothyronine deiodinase | DIO1 |
| Baihuasheshecao | MOL000098 | quercetin | Procollagen C-endopeptidase enhancer 1 | PCOLCE |
| Baihuasheshecao | MOL000098 | quercetin | Puromycin-sensitive aminopeptidase | NPEPPS |
| Baihuasheshecao | MOL000098 | quercetin | Hexokinase-2 | HK2 |
| Baihuasheshecao | MOL000098 | quercetin | Ras GTPase-activating protein 1 | RASA1 |
| Baihuasheshecao | MOL000098 | quercetin | Glutathione S-transferase Mu 1 | GSTM1 |
| Baihuasheshecao | MOL000098 | quercetin | Glutathione S-transferase Mu 2 | GSTM2 |
| Baimaogen | MOL001870 | LUTEOLINIDIN | Prostaglandin G/H synthase 1 | PTGS1 |
| Baimaogen | MOL001870 | LUTEOLINIDIN | Prostaglandin G/H synthase 2 | PTGS2 |
| Baimaogen | MOL001870 | LUTEOLINIDIN | Carbonic anhydrase 2 | CA2 |
| Baimaogen | MOL001870 | LUTEOLINIDIN | Heat shock protein HSP 90-alpha | HSP90AA1 |
| Baimaogen | MOL001870 | LUTEOLINIDIN | cAMP-dependent protein kinase catalytic subunit alpha | PRKACA |
| Baimaogen | MOL001870 | LUTEOLINIDIN | Nuclear receptor coactivator 2 | NCOA2 |
| Baimaogen | MOL000358 | beta-sitosterol | Progesterone receptor | PGR |
| Baimaogen | MOL000358 | beta-sitosterol | Nuclear receptor coactivator 2 | NCOA2 |
| Baimaogen | MOL000358 | beta-sitosterol | Prostaglandin G/H synthase 1 | PTGS1 |
| Baimaogen | MOL000358 | beta-sitosterol | Prostaglandin G/H synthase 2 | PTGS2 |
| Baimaogen | MOL000358 | beta-sitosterol | Heat shock protein HSP 90-alpha | HSP90AA1 |
| Baimaogen | MOL000358 | beta-sitosterol | Potassium voltage-gated channel subfamily H member 2 | KCNH2 |
| Baimaogen | MOL000358 | beta-sitosterol | cAMP-dependent protein kinase catalytic subunit alpha | PRKACA |
| Baimaogen | MOL000358 | beta-sitosterol | D(1A) dopamine receptor | DRD1 |
| Baimaogen | MOL000358 | beta-sitosterol | Muscarinic acetylcholine receptor M3 | CHRM3 |
| Baimaogen | MOL000358 | beta-sitosterol | Muscarinic acetylcholine receptor M1 | CHRM1 |
| Baimaogen | MOL000358 | beta-sitosterol | Sodium channel protein type 5 subunit alpha | SCN5A |
| Baimaogen | MOL000358 | beta-sitosterol | Muscarinic acetylcholine receptor M4 | CHRM4 |
| Baimaogen | MOL000358 | beta-sitosterol | cGMP-inhibited 3',5'-cyclic phosphodiesterase A | PDE3A |
| Baimaogen | MOL000358 | beta-sitosterol | Alpha-1A adrenergic receptor | ADRA1A |
| Baimaogen | MOL000358 | beta-sitosterol | Muscarinic acetylcholine receptor M2 | CHRM2 |
| Baimaogen | MOL000358 | beta-sitosterol | Alpha-1B adrenergic receptor | ADRA1B |
| Baimaogen | MOL000358 | beta-sitosterol | Beta-2 adrenergic receptor | ADRB2 |
| Baimaogen | MOL000358 | beta-sitosterol | Neuronal acetylcholine receptor subunit alpha-2 | CHRNA2 |
| Baimaogen | MOL000358 | beta-sitosterol | Sodium-dependent serotonin transporter | SLC6A4 |
| Baimaogen | MOL000358 | beta-sitosterol | Mu-type opioid receptor | OPRM1 |
| Baimaogen | MOL000358 | beta-sitosterol | Neuronal acetylcholine receptor subunit alpha-7 | CHRNA7 |
| Baimaogen | MOL000358 | beta-sitosterol | Apoptosis regulator Bcl-2 | BCL2 |
| Baimaogen | MOL000358 | beta-sitosterol | Apoptosis regulator BAX | BAX |
| Baimaogen | MOL000358 | beta-sitosterol | Caspase-9 | CASP9 |
| Baimaogen | MOL000358 | beta-sitosterol | Transcription factor AP-1 | JUN |
| Baimaogen | MOL000358 | beta-sitosterol | Caspase-3 | CASP3 |
| Baimaogen | MOL000358 | beta-sitosterol | Caspase-8 | CASP8 |
| Baimaogen | MOL000358 | beta-sitosterol | Protein kinase C alpha type | PRKCA |
| Baimaogen | MOL000358 | beta-sitosterol | Serum paraoxonase/arylesterase 1 | PON1 |
| Baimaogen | MOL000358 | beta-sitosterol | Microtubule-associated protein 2 | MAP2 |
| Baimaogen | MOL000387 | Bifendate | Prostaglandin G/H synthase 2 | PTGS2 |
| Baimaogen | MOL000387 | Bifendate | Vascular endothelial growth factor receptor 2 | KDR |
| Baimaogen | MOL000387 | Bifendate | Hepatocyte growth factor receptor | MET |
| Baimaogen | MOL000387 | Bifendate | Heat shock protein HSP 90-alpha | HSP90AA1 |
| Baimaogen | MOL000387 | Bifendate | Prostaglandin G/H synthase 1 | PTGS1 |
| Baimaogen | MOL000387 | Bifendate | DNA topoisomerase 2-alpha | TOP2A |
| Baimaogen | MOL000449 | Stigmasterol | Progesterone receptor | PGR |
| Baimaogen | MOL000449 | Stigmasterol | Mineralocorticoid receptor | NR3C2 |
| Baimaogen | MOL000449 | Stigmasterol | Nuclear receptor coactivator 2 | NCOA2 |
| Baimaogen | MOL000449 | Stigmasterol | Retinoic acid receptor RXR-alpha | RXRA |
| Baimaogen | MOL000449 | Stigmasterol | Nuclear receptor coactivator 1 | NCOA1 |
| Baimaogen | MOL000449 | Stigmasterol | Prostaglandin G/H synthase 1 | PTGS1 |
| Baimaogen | MOL000449 | Stigmasterol | Prostaglandin G/H synthase 2 | PTGS2 |
| Baimaogen | MOL000449 | Stigmasterol | Alpha-2A adrenergic receptor | ADRA2A |
| Baimaogen | MOL000449 | Stigmasterol | Sodium-dependent noradrenaline transporter | SLC6A2 |
| Baimaogen | MOL000449 | Stigmasterol | Sodium-dependent dopamine transporter | SLC6A3 |
| Baimaogen | MOL000449 | Stigmasterol | Beta-2 adrenergic receptor | ADRB2 |
| Baimaogen | MOL000449 | Stigmasterol | Urokinase-type plasminogen activator | PLAU |
| Baimaogen | MOL000449 | Stigmasterol | Leukotriene A-4 hydrolase | LTA4H |
| Baimaogen | MOL000449 | Stigmasterol | Amine oxidase [flavin-containing] B | MAOB |
| Baimaogen | MOL000449 | Stigmasterol | Amine oxidase [flavin-containing] A | MAOA |
| Baimaogen | MOL000449 | Stigmasterol | cAMP-dependent protein kinase catalytic subunit alpha | PRKACA |
| Baimaogen | MOL000449 | Stigmasterol | Chymotrypsinogen B | CTRB1 |
| Baimaogen | MOL000449 | Stigmasterol | Muscarinic acetylcholine receptor M3 | CHRM3 |
| Baimaogen | MOL000449 | Stigmasterol | Muscarinic acetylcholine receptor M1 | CHRM1 |
| Baimaogen | MOL000449 | Stigmasterol | Beta-1 adrenergic receptor | ADRB1 |
| Baimaogen | MOL000449 | Stigmasterol | Sodium channel protein type 5 subunit alpha | SCN5A |
| Baimaogen | MOL000449 | Stigmasterol | Alpha-1A adrenergic receptor | ADRA1A |
| Baimaogen | MOL000449 | Stigmasterol | Muscarinic acetylcholine receptor M2 | CHRM2 |
| Baimaogen | MOL000449 | Stigmasterol | Alpha-1B adrenergic receptor | ADRA1B |
| Baimaogen | MOL000449 | Stigmasterol | Neuronal acetylcholine receptor subunit alpha-7 | CHRNA7 |
| Danshen | MOL001601 | 1,2,5,6-tetrahydrotanshinone | Prostaglandin G/H synthase 1 | PTGS1 |
| Danshen | MOL001601 | 1,2,5,6-tetrahydrotanshinone | Muscarinic acetylcholine receptor M3 | CHRM3 |
| Danshen | MOL001601 | 1,2,5,6-tetrahydrotanshinone | Muscarinic acetylcholine receptor M1 | CHRM1 |
| Danshen | MOL001601 | 1,2,5,6-tetrahydrotanshinone | Sodium channel protein type 5 subunit alpha | SCN5A |
| Danshen | MOL001601 | 1,2,5,6-tetrahydrotanshinone | Muscarinic acetylcholine receptor M5 | CHRM5 |
| Danshen | MOL001601 | 1,2,5,6-tetrahydrotanshinone | Prostaglandin G/H synthase 2 | PTGS2 |
| Danshen | MOL001601 | 1,2,5,6-tetrahydrotanshinone | Carbonic anhydrase 2 | CA2 |
| Danshen | MOL001601 | 1,2,5,6-tetrahydrotanshinone | Muscarinic acetylcholine receptor M4 | CHRM4 |
| Danshen | MOL001601 | 1,2,5,6-tetrahydrotanshinone | Retinoic acid receptor RXR-alpha | RXRA |
| Danshen | MOL001601 | 1,2,5,6-tetrahydrotanshinone | Delta-type opioid receptor | OPRD1 |
| Danshen | MOL001601 | 1,2,5,6-tetrahydrotanshinone | cGMP-inhibited 3',5'-cyclic phosphodiesterase A | PDE3A |
| Danshen | MOL001601 | 1,2,5,6-tetrahydrotanshinone | Alpha-1A adrenergic receptor | ADRA1A |
| Danshen | MOL001601 | 1,2,5,6-tetrahydrotanshinone | Muscarinic acetylcholine receptor M2 | CHRM2 |
| Danshen | MOL001601 | 1,2,5,6-tetrahydrotanshinone | Alpha-1B adrenergic receptor | ADRA1B |
| Danshen | MOL001601 | 1,2,5,6-tetrahydrotanshinone | Sodium-dependent dopamine transporter | SLC6A3 |
| Danshen | MOL001601 | 1,2,5,6-tetrahydrotanshinone | Beta-2 adrenergic receptor | ADRB2 |
| Danshen | MOL001601 | 1,2,5,6-tetrahydrotanshinone | Alpha-1D adrenergic receptor | ADRA1D |
| Danshen | MOL001601 | 1,2,5,6-tetrahydrotanshinone | DNA topoisomerase 2-alpha | TOP2A |
| Danshen | MOL001601 | 1,2,5,6-tetrahydrotanshinone | Mu-type opioid receptor | OPRM1 |
| Danshen | MOL001601 | 1,2,5,6-tetrahydrotanshinone | Heat shock protein HSP 90-alpha | HSP90AA1 |
| Danshen | MOL001601 | 1,2,5,6-tetrahydrotanshinone | Neuronal acetylcholine receptor subunit alpha-7 | CHRNA7 |
| Danshen | MOL001601 | 1,2,5,6-tetrahydrotanshinone | Nuclear receptor coactivator 2 | NCOA2 |
| Danshen | MOL001601 | 1,2,5,6-tetrahydrotanshinone | Nuclear receptor coactivator 1 | NCOA1 |
| Danshen | MOL001601 | 1,2,5,6-tetrahydrotanshinone | D(1A) dopamine receptor | DRD1 |
| Danshen | MOL001601 | 1,2,5,6-tetrahydrotanshinone | Sodium-dependent serotonin transporter | SLC6A4 |
| Danshen | MOL001659 | Poriferasterol | Progesterone receptor | PGR |
| Danshen | MOL001659 | Poriferasterol | Mineralocorticoid receptor | NR3C2 |
| Danshen | MOL001771 | poriferast-5-en-3beta-ol | Progesterone receptor | PGR |
| Danshen | MOL001771 | poriferast-5-en-3beta-ol | Nuclear receptor coactivator 2 | NCOA2 |
| Danshen | MOL001942 | isoimperatorin | Prostaglandin G/H synthase 2 | PTGS2 |
| Danshen | MOL002222 | sugiol | Muscarinic acetylcholine receptor M3 | CHRM3 |
| Danshen | MOL002222 | sugiol | Muscarinic acetylcholine receptor M1 | CHRM1 |
| Danshen | MOL002222 | sugiol | Sodium channel protein type 5 subunit alpha | SCN5A |
| Danshen | MOL002222 | sugiol | Muscarinic acetylcholine receptor M5 | CHRM5 |
| Danshen | MOL002222 | sugiol | Prostaglandin G/H synthase 2 | PTGS2 |
| Danshen | MOL002222 | sugiol | Carbonic anhydrase 2 | CA2 |
| Danshen | MOL002222 | sugiol | Muscarinic acetylcholine receptor M4 | CHRM4 |
| Danshen | MOL002222 | sugiol | Delta-type opioid receptor | OPRD1 |
| Danshen | MOL002222 | sugiol | Acetylcholinesterase | ACHE |
| Danshen | MOL002222 | sugiol | Alpha-1A adrenergic receptor | ADRA1A |
| Danshen | MOL002222 | sugiol | Muscarinic acetylcholine receptor M2 | CHRM2 |
| Danshen | MOL002222 | sugiol | Alpha-1B adrenergic receptor | ADRA1B |
| Danshen | MOL002222 | sugiol | Beta-2 adrenergic receptor | ADRB2 |
| Danshen | MOL002222 | sugiol | Alpha-1D adrenergic receptor | ADRA1D |
| Danshen | MOL002222 | sugiol | D(2) dopamine receptor | DRD2 |
| Danshen | MOL002222 | sugiol | Mu-type opioid receptor | OPRM1 |
| Danshen | MOL002222 | sugiol | Neuronal acetylcholine receptor subunit alpha-7 | CHRNA7 |
| Danshen | MOL002651 | Dehydrotanshinone II A | D(1A) dopamine receptor | DRD1 |
| Danshen | MOL002651 | Dehydrotanshinone II A | Muscarinic acetylcholine receptor M3 | CHRM3 |
| Danshen | MOL002651 | Dehydrotanshinone II A | Prothrombin | F2 |
| Danshen | MOL002651 | Dehydrotanshinone II A | Muscarinic acetylcholine receptor M1 | CHRM1 |
| Danshen | MOL002651 | Dehydrotanshinone II A | Estrogen receptor | ESR1 |
| Danshen | MOL002651 | Dehydrotanshinone II A | Androgen receptor | AR |
| Danshen | MOL002651 | Dehydrotanshinone II A | Sodium channel protein type 5 subunit alpha | SCN5A |
| Danshen | MOL002651 | Dehydrotanshinone II A | Peroxisome proliferator-activated receptor gamma | PPARG |
| Danshen | MOL002651 | Dehydrotanshinone II A | Muscarinic acetylcholine receptor M5 | CHRM5 |
| Danshen | MOL002651 | Dehydrotanshinone II A | Prostaglandin G/H synthase 2 | PTGS2 |
| Danshen | MOL002651 | Dehydrotanshinone II A | Muscarinic acetylcholine receptor M4 | CHRM4 |
| Danshen | MOL002651 | Dehydrotanshinone II A | Delta-type opioid receptor | OPRD1 |
| Danshen | MOL002651 | Dehydrotanshinone II A | Acetylcholinesterase | ACHE |
| Danshen | MOL002651 | Dehydrotanshinone II A | Alpha-1A adrenergic receptor | ADRA1A |
| Danshen | MOL002651 | Dehydrotanshinone II A | Beta-2 adrenergic receptor | ADRB2 |
| Danshen | MOL002651 | Dehydrotanshinone II A | Mu-type opioid receptor | OPRM1 |
| Danshen | MOL002651 | Dehydrotanshinone II A | Dipeptidyl peptidase 4 | DPP4 |
| Danshen | MOL002651 | Dehydrotanshinone II A | Neuronal acetylcholine receptor subunit alpha-7 | CHRNA7 |
| Danshen | MOL002651 | Dehydrotanshinone II A | Nuclear receptor coactivator 1 | NCOA1 |
| Danshen | MOL002776 | Baicalin | Coagulation factor X | F10 |
| Danshen | MOL002776 | Baicalin | Tyrosine-protein phosphatase non-receptor type 1 | PTPN1 |
| Danshen | MOL000569 | digallate | Prostaglandin G/H synthase 2 | PTGS2 |
| Danshen | MOL000569 | digallate | Heat shock protein HSP 90-alpha | HSP90AA1 |
| Danshen | MOL000006 | luteolin | Prostaglandin G/H synthase 1 | PTGS1 |
| Danshen | MOL000006 | luteolin | Androgen receptor | AR |
| Danshen | MOL000006 | luteolin | Prostaglandin G/H synthase 2 | PTGS2 |
| Danshen | MOL000006 | luteolin | Heat shock protein HSP 90-alpha | HSP90AA1 |
| Danshen | MOL000006 | luteolin | Trypsin-1 | PRSS1 |
| Danshen | MOL000006 | luteolin | Nuclear receptor coactivator 2 | NCOA2 |
| Danshen | MOL000006 | luteolin | cAMP-dependent protein kinase catalytic subunit alpha | PRKACA |
| Danshen | MOL000006 | luteolin | Dipeptidyl peptidase 4 | DPP4 |
| Danshen | MOL000006 | luteolin | Transcription factor p65 | RELA |
| Danshen | MOL000006 | luteolin | Epidermal growth factor receptor | EGFR |
| Danshen | MOL000006 | luteolin | RAC-alpha serine/threonine-protein kinase | AKT1 |
| Danshen | MOL000006 | luteolin | G1/S-specific cyclin-D1 | CCND1 |
| Danshen | MOL000006 | luteolin | Bcl-2-like protein 1 | BCL2L1 |
| Danshen | MOL000006 | luteolin | Cyclin-dependent kinase inhibitor 1 | CDKN1A |
| Danshen | MOL000006 | luteolin | Caspase-9 | CASP9 |
| Danshen | MOL000006 | luteolin | 72 kDa type IV collagenase | MMP2 |
| Danshen | MOL000006 | luteolin | Matrix metalloproteinase-9 | MMP9 |
| Danshen | MOL000006 | luteolin | Mitogen-activated protein kinase 1 | MAPK1 |
| Danshen | MOL000006 | luteolin | Interleukin-10 | IL10 |
| Danshen | MOL000006 | luteolin | Retinoblastoma-associated protein | RB1 |
| Danshen | MOL000006 | luteolin | Tumor necrosis factor | TNF |
| Danshen | MOL000006 | luteolin | Transcription factor AP-1 | JUN |
| Danshen | MOL000006 | luteolin | Interleukin-6 | IL6 |
| Danshen | MOL000006 | luteolin | Caspase-3 | CASP3 |
| Danshen | MOL000006 | luteolin | Cellular tumor antigen p53 | TP53 |
| Danshen | MOL000006 | luteolin | NF-kappa-B inhibitor alpha | NFKBIA |
| Danshen | MOL000006 | luteolin | DNA topoisomerase 1 | TOP1 |
| Danshen | MOL000006 | luteolin | E3 ubiquitin-protein ligase Mdm2 | MDM2 |
| Danshen | MOL000006 | luteolin | Amyloid beta A4 protein | APP |
| Danshen | MOL000006 | luteolin | Interstitial collagenase | MMP1 |
| Danshen | MOL000006 | luteolin | Proliferating cell nuclear antigen | PCNA |
| Danshen | MOL000006 | luteolin | Receptor tyrosine-protein kinase erbB-2 | ERBB2 |
| Danshen | MOL000006 | luteolin | Peroxisome proliferator-activated receptor gamma | PPARG |
| Danshen | MOL000006 | luteolin | Heme oxygenase 1 | HMOX1 |
| Danshen | MOL000006 | luteolin | Caspase-7 | CASP7 |
| Danshen | MOL000006 | luteolin | Intercellular adhesion molecule 1 | ICAM1 |
| Danshen | MOL000006 | luteolin | Induced myeloid leukemia cell differentiation protein Mcl-1 | MCL1 |
| Danshen | MOL000006 | luteolin | Baculoviral IAP repeat-containing protein 5 | BIRC5 |
| Danshen | MOL000006 | luteolin | Interleukin-2 | IL2 |
| Danshen | MOL000006 | luteolin | G2/mitotic-specific cyclin-B1 | CCNB1 |
| Danshen | MOL000006 | luteolin | Tyrosinase | TYR |
| Danshen | MOL000006 | luteolin | Interferon gamma | IFNG |
| Danshen | MOL000006 | luteolin | Interleukin-4 | IL4 |
| Danshen | MOL000006 | luteolin | DNA topoisomerase 2-alpha | TOP2A |
| Danshen | MOL000006 | luteolin | Solute carrier family 2, facilitated glucose transporter member 4 | SLC2A4 |
| Danshen | MOL000006 | luteolin | Insulin receptor | INSR |
| Danshen | MOL000006 | luteolin | CD40 ligand | CD40LG |
| Danshen | MOL000006 | luteolin | Prostaglandin E synthase | PTGES |
| Danshen | MOL000006 | luteolin | Kinetochore protein Nuf2 | NUF2 |
| Danshen | MOL000006 | luteolin | Adenylate cyclase type 2 | ADCY2 |
| Danshen | MOL000006 | luteolin | Hepatocyte growth factor receptor | MET |
| Danshen | MOL007036 | 5,6-dihydroxy-7-isopropyl-1,1-dimethyl-2,3-dihydrophenanthren-4-one | Prostaglandin G/H synthase 1 | PTGS1 |
| Danshen | MOL007036 | 5,6-dihydroxy-7-isopropyl-1,1-dimethyl-2,3-dihydrophenanthren-4-one | Muscarinic acetylcholine receptor M3 | CHRM3 |
| Danshen | MOL007036 | 5,6-dihydroxy-7-isopropyl-1,1-dimethyl-2,3-dihydrophenanthren-4-one | Muscarinic acetylcholine receptor M1 | CHRM1 |
| Danshen | MOL007036 | 5,6-dihydroxy-7-isopropyl-1,1-dimethyl-2,3-dihydrophenanthren-4-one | Sodium channel protein type 5 subunit alpha | SCN5A |
| Danshen | MOL007036 | 5,6-dihydroxy-7-isopropyl-1,1-dimethyl-2,3-dihydrophenanthren-4-one | Prostaglandin G/H synthase 2 | PTGS2 |
| Danshen | MOL007036 | 5,6-dihydroxy-7-isopropyl-1,1-dimethyl-2,3-dihydrophenanthren-4-one | Carbonic anhydrase 2 | CA2 |
| Danshen | MOL007036 | 5,6-dihydroxy-7-isopropyl-1,1-dimethyl-2,3-dihydrophenanthren-4-one | Retinoic acid receptor RXR-alpha | RXRA |
| Danshen | MOL007036 | 5,6-dihydroxy-7-isopropyl-1,1-dimethyl-2,3-dihydrophenanthren-4-one | Acetylcholinesterase | ACHE |
| Danshen | MOL007036 | 5,6-dihydroxy-7-isopropyl-1,1-dimethyl-2,3-dihydrophenanthren-4-one | Alpha-1A adrenergic receptor | ADRA1A |
| Danshen | MOL007036 | 5,6-dihydroxy-7-isopropyl-1,1-dimethyl-2,3-dihydrophenanthren-4-one | Alpha-1B adrenergic receptor | ADRA1B |
| Danshen | MOL007036 | 5,6-dihydroxy-7-isopropyl-1,1-dimethyl-2,3-dihydrophenanthren-4-one | Beta-2 adrenergic receptor | ADRB2 |
| Danshen | MOL007036 | 5,6-dihydroxy-7-isopropyl-1,1-dimethyl-2,3-dihydrophenanthren-4-one | DNA topoisomerase 2-alpha | TOP2A |
| Danshen | MOL007036 | 5,6-dihydroxy-7-isopropyl-1,1-dimethyl-2,3-dihydrophenanthren-4-one | Mu-type opioid receptor | OPRM1 |
| Danshen | MOL007036 | 5,6-dihydroxy-7-isopropyl-1,1-dimethyl-2,3-dihydrophenanthren-4-one | Nuclear receptor coactivator 2 | NCOA2 |
| Danshen | MOL007036 | 5,6-dihydroxy-7-isopropyl-1,1-dimethyl-2,3-dihydrophenanthren-4-one | Nuclear receptor coactivator 1 | NCOA1 |
| Danshen | MOL007041 | 2-isopropyl-8-methylphenanthrene-3,4-dione | Prostaglandin G/H synthase 1 | PTGS1 |
| Danshen | MOL007041 | 2-isopropyl-8-methylphenanthrene-3,4-dione | D(1A) dopamine receptor | DRD1 |
| Danshen | MOL007041 | 2-isopropyl-8-methylphenanthrene-3,4-dione | Muscarinic acetylcholine receptor M3 | CHRM3 |
| Danshen | MOL007041 | 2-isopropyl-8-methylphenanthrene-3,4-dione | Muscarinic acetylcholine receptor M1 | CHRM1 |
| Danshen | MOL007041 | 2-isopropyl-8-methylphenanthrene-3,4-dione | Estrogen receptor | ESR1 |
| Danshen | MOL007041 | 2-isopropyl-8-methylphenanthrene-3,4-dione | Androgen receptor | AR |
| Danshen | MOL007041 | 2-isopropyl-8-methylphenanthrene-3,4-dione | Sodium channel protein type 5 subunit alpha | SCN5A |
| Danshen | MOL007041 | 2-isopropyl-8-methylphenanthrene-3,4-dione | Peroxisome proliferator-activated receptor gamma | PPARG |
| Danshen | MOL007041 | 2-isopropyl-8-methylphenanthrene-3,4-dione | Muscarinic acetylcholine receptor M5 | CHRM5 |
| Danshen | MOL007041 | 2-isopropyl-8-methylphenanthrene-3,4-dione | Prostaglandin G/H synthase 2 | PTGS2 |
| Danshen | MOL007041 | 2-isopropyl-8-methylphenanthrene-3,4-dione | Muscarinic acetylcholine receptor M4 | CHRM4 |
| Danshen | MOL007041 | 2-isopropyl-8-methylphenanthrene-3,4-dione | Retinoic acid receptor RXR-alpha | RXRA |
| Danshen | MOL007041 | 2-isopropyl-8-methylphenanthrene-3,4-dione | Alpha-1A adrenergic receptor | ADRA1A |
| Danshen | MOL007041 | 2-isopropyl-8-methylphenanthrene-3,4-dione | Muscarinic acetylcholine receptor M2 | CHRM2 |
| Danshen | MOL007041 | 2-isopropyl-8-methylphenanthrene-3,4-dione | Alpha-1B adrenergic receptor | ADRA1B |
| Danshen | MOL007041 | 2-isopropyl-8-methylphenanthrene-3,4-dione | Sodium-dependent dopamine transporter | SLC6A3 |
| Danshen | MOL007041 | 2-isopropyl-8-methylphenanthrene-3,4-dione | Beta-2 adrenergic receptor | ADRB2 |
| Danshen | MOL007041 | 2-isopropyl-8-methylphenanthrene-3,4-dione | Alpha-1D adrenergic receptor | ADRA1D |
| Danshen | MOL007041 | 2-isopropyl-8-methylphenanthrene-3,4-dione | Sodium-dependent serotonin transporter | SLC6A4 |
| Danshen | MOL007041 | 2-isopropyl-8-methylphenanthrene-3,4-dione | Mu-type opioid receptor | OPRM1 |
| Danshen | MOL007041 | 2-isopropyl-8-methylphenanthrene-3,4-dione | Neuronal acetylcholine receptor subunit alpha-7 | CHRNA7 |
| Danshen | MOL007041 | 2-isopropyl-8-methylphenanthrene-3,4-dione | cAMP-dependent protein kinase catalytic subunit alpha | PRKACA |
| Danshen | MOL007041 | 2-isopropyl-8-methylphenanthrene-3,4-dione | Cyclin-A2 | CCNA2 |
| Danshen | MOL007041 | 2-isopropyl-8-methylphenanthrene-3,4-dione | Nuclear receptor coactivator 2 | NCOA2 |
| Danshen | MOL007045 | 3α-hydroxytanshinoneⅡa | Prothrombin | F2 |
| Danshen | MOL007045 | 3α-hydroxytanshinoneⅡa | Muscarinic acetylcholine receptor M1 | CHRM1 |
| Danshen | MOL007045 | 3α-hydroxytanshinoneⅡa | Sodium channel protein type 5 subunit alpha | SCN5A |
| Danshen | MOL007045 | 3α-hydroxytanshinoneⅡa | Muscarinic acetylcholine receptor M5 | CHRM5 |
| Danshen | MOL007045 | 3α-hydroxytanshinoneⅡa | Prostaglandin G/H synthase 2 | PTGS2 |
| Danshen | MOL007045 | 3α-hydroxytanshinoneⅡa | Delta-type opioid receptor | OPRD1 |
| Danshen | MOL007045 | 3α-hydroxytanshinoneⅡa | Acetylcholinesterase | ACHE |
| Danshen | MOL007045 | 3α-hydroxytanshinoneⅡa | Beta-2 adrenergic receptor | ADRB2 |
| Danshen | MOL007045 | 3α-hydroxytanshinoneⅡa | Mu-type opioid receptor | OPRM1 |
| Danshen | MOL007045 | 3α-hydroxytanshinoneⅡa | Dipeptidyl peptidase 4 | DPP4 |
| Danshen | MOL007045 | 3α-hydroxytanshinoneⅡa | Neuronal acetylcholine receptor subunit alpha-7 | CHRNA7 |
| Danshen | MOL007045 | 3α-hydroxytanshinoneⅡa | Trypsin-1 | PRSS1 |
| Danshen | MOL007045 | 3α-hydroxytanshinoneⅡa | Nuclear receptor coactivator 1 | NCOA1 |
| Danshen | MOL007048 | (E)-3-[2-(3,4-dihydroxyphenyl)-7-hydroxy-benzofuran-4-yl]acrylic acid | Prostaglandin G/H synthase 2 | PTGS2 |
| Danshen | MOL007048 | (E)-3-[2-(3,4-dihydroxyphenyl)-7-hydroxy-benzofuran-4-yl]acrylic acid | Tyrosine-protein phosphatase non-receptor type 1 | PTPN1 |
| Danshen | MOL007048 | (E)-3-[2-(3,4-dihydroxyphenyl)-7-hydroxy-benzofuran-4-yl]acrylic acid | Heat shock protein HSP 90-alpha | HSP90AA1 |
| Danshen | MOL007049 | 4-methylenemiltirone | Prostaglandin G/H synthase 1 | PTGS1 |
| Danshen | MOL007049 | 4-methylenemiltirone | D(1A) dopamine receptor | DRD1 |
| Danshen | MOL007049 | 4-methylenemiltirone | Muscarinic acetylcholine receptor M3 | CHRM3 |
| Danshen | MOL007049 | 4-methylenemiltirone | Muscarinic acetylcholine receptor M1 | CHRM1 |
| Danshen | MOL007049 | 4-methylenemiltirone | Estrogen receptor | ESR1 |
| Danshen | MOL007049 | 4-methylenemiltirone | Androgen receptor | AR |
| Danshen | MOL007049 | 4-methylenemiltirone | Sodium channel protein type 5 subunit alpha | SCN5A |
| Danshen | MOL007049 | 4-methylenemiltirone | Peroxisome proliferator-activated receptor gamma | PPARG |
| Danshen | MOL007049 | 4-methylenemiltirone | Muscarinic acetylcholine receptor M5 | CHRM5 |
| Danshen | MOL007049 | 4-methylenemiltirone | Prostaglandin G/H synthase 2 | PTGS2 |
| Danshen | MOL007049 | 4-methylenemiltirone | Alpha-2A adrenergic receptor | ADRA2A |
| Danshen | MOL007049 | 4-methylenemiltirone | Carbonic anhydrase 2 | CA2 |
| Danshen | MOL007049 | 4-methylenemiltirone | Alpha-2C adrenergic receptor | ADRA2C |
| Danshen | MOL007049 | 4-methylenemiltirone | Muscarinic acetylcholine receptor M4 | CHRM4 |
| Danshen | MOL007049 | 4-methylenemiltirone | Retinoic acid receptor RXR-alpha | RXRA |
| Danshen | MOL007049 | 4-methylenemiltirone | Delta-type opioid receptor | OPRD1 |
| Danshen | MOL007049 | 4-methylenemiltirone | Alpha-1A adrenergic receptor | ADRA1A |
| Danshen | MOL007049 | 4-methylenemiltirone | Muscarinic acetylcholine receptor M2 | CHRM2 |
| Danshen | MOL007049 | 4-methylenemiltirone | Alpha-1B adrenergic receptor | ADRA1B |
| Danshen | MOL007049 | 4-methylenemiltirone | Sodium-dependent dopamine transporter | SLC6A3 |
| Danshen | MOL007049 | 4-methylenemiltirone | Beta-2 adrenergic receptor | ADRB2 |
| Danshen | MOL007049 | 4-methylenemiltirone | Alpha-1D adrenergic receptor | ADRA1D |
| Danshen | MOL007049 | 4-methylenemiltirone | DNA topoisomerase 2-alpha | TOP2A |
| Danshen | MOL007049 | 4-methylenemiltirone | Sodium-dependent serotonin transporter | SLC6A4 |
| Danshen | MOL007049 | 4-methylenemiltirone | D(2) dopamine receptor | DRD2 |
| Danshen | MOL007049 | 4-methylenemiltirone | Mu-type opioid receptor | OPRM1 |
| Danshen | MOL007049 | 4-methylenemiltirone | Neuronal acetylcholine receptor subunit alpha-7 | CHRNA7 |
| Danshen | MOL007049 | 4-methylenemiltirone | cAMP-dependent protein kinase catalytic subunit alpha | PRKACA |
| Danshen | MOL007049 | 4-methylenemiltirone | Nuclear receptor coactivator 2 | NCOA2 |
| Danshen | MOL007049 | 4-methylenemiltirone | Nuclear receptor coactivator 1 | NCOA1 |
| Danshen | MOL007050 | 2-(4-hydroxy-3-methoxyphenyl)-5-(3-hydroxypropyl)-7-methoxy-3-benzofurancarboxaldehyde | Nitric oxide synthase, inducible | NOS2 |
| Danshen | MOL007050 | 2-(4-hydroxy-3-methoxyphenyl)-5-(3-hydroxypropyl)-7-methoxy-3-benzofurancarboxaldehyde | Prothrombin | F2 |
| Danshen | MOL007050 | 2-(4-hydroxy-3-methoxyphenyl)-5-(3-hydroxypropyl)-7-methoxy-3-benzofurancarboxaldehyde | Estrogen receptor | ESR1 |
| Danshen | MOL007050 | 2-(4-hydroxy-3-methoxyphenyl)-5-(3-hydroxypropyl)-7-methoxy-3-benzofurancarboxaldehyde | Androgen receptor | AR |
| Danshen | MOL007050 | 2-(4-hydroxy-3-methoxyphenyl)-5-(3-hydroxypropyl)-7-methoxy-3-benzofurancarboxaldehyde | Peroxisome proliferator-activated receptor gamma | PPARG |
| Danshen | MOL007050 | 2-(4-hydroxy-3-methoxyphenyl)-5-(3-hydroxypropyl)-7-methoxy-3-benzofurancarboxaldehyde | Estrogen receptor beta | ESR2 |
| Danshen | MOL007050 | 2-(4-hydroxy-3-methoxyphenyl)-5-(3-hydroxypropyl)-7-methoxy-3-benzofurancarboxaldehyde | Mitogen-activated protein kinase 14 | MAPK14 |
| Danshen | MOL007050 | 2-(4-hydroxy-3-methoxyphenyl)-5-(3-hydroxypropyl)-7-methoxy-3-benzofurancarboxaldehyde | Glycogen synthase kinase-3 beta | GSK3B |
| Danshen | MOL007050 | 2-(4-hydroxy-3-methoxyphenyl)-5-(3-hydroxypropyl)-7-methoxy-3-benzofurancarboxaldehyde | Heat shock protein HSP 90-alpha | HSP90AA1 |
| Danshen | MOL007050 | 2-(4-hydroxy-3-methoxyphenyl)-5-(3-hydroxypropyl)-7-methoxy-3-benzofurancarboxaldehyde | Cyclin-A2 | CCNA2 |
| Danshen | MOL007058 | formyltanshinone | Prothrombin | F2 |
| Danshen | MOL007058 | formyltanshinone | Androgen receptor | AR |
| Danshen | MOL007058 | formyltanshinone | Prostaglandin G/H synthase 2 | PTGS2 |
| Danshen | MOL007058 | formyltanshinone | Retinoic acid receptor RXR-alpha | RXRA |
| Danshen | MOL007058 | formyltanshinone | Dipeptidyl peptidase 4 | DPP4 |
| Danshen | MOL007058 | formyltanshinone | cAMP-dependent protein kinase catalytic subunit alpha | PRKACA |
| Danshen | MOL007058 | formyltanshinone | Nuclear receptor coactivator 1 | NCOA1 |
| Danshen | MOL007059 | 3-beta-Hydroxymethyllenetanshiquinone | D(1A) dopamine receptor | DRD1 |
| Danshen | MOL007059 | 3-beta-Hydroxymethyllenetanshiquinone | Prothrombin | F2 |
| Danshen | MOL007059 | 3-beta-Hydroxymethyllenetanshiquinone | Muscarinic acetylcholine receptor M1 | CHRM1 |
| Danshen | MOL007059 | 3-beta-Hydroxymethyllenetanshiquinone | Prostaglandin G/H synthase 2 | PTGS2 |
| Danshen | MOL007059 | 3-beta-Hydroxymethyllenetanshiquinone | Carbonic anhydrase 2 | CA2 |
| Danshen | MOL007059 | 3-beta-Hydroxymethyllenetanshiquinone | Retinoic acid receptor RXR-alpha | RXRA |
| Danshen | MOL007059 | 3-beta-Hydroxymethyllenetanshiquinone | Delta-type opioid receptor | OPRD1 |
| Danshen | MOL007059 | 3-beta-Hydroxymethyllenetanshiquinone | Acetylcholinesterase | ACHE |
| Danshen | MOL007059 | 3-beta-Hydroxymethyllenetanshiquinone | Alpha-1A adrenergic receptor | ADRA1A |
| Danshen | MOL007059 | 3-beta-Hydroxymethyllenetanshiquinone | Beta-2 adrenergic receptor | ADRB2 |
| Danshen | MOL007059 | 3-beta-Hydroxymethyllenetanshiquinone | Mu-type opioid receptor | OPRM1 |
| Danshen | MOL007059 | 3-beta-Hydroxymethyllenetanshiquinone | Dipeptidyl peptidase 4 | DPP4 |
| Danshen | MOL007059 | 3-beta-Hydroxymethyllenetanshiquinone | Heat shock protein HSP 90-alpha | HSP90AA1 |
| Danshen | MOL007059 | 3-beta-Hydroxymethyllenetanshiquinone | Neuronal acetylcholine receptor subunit alpha-7 | CHRNA7 |
| Danshen | MOL007059 | 3-beta-Hydroxymethyllenetanshiquinone | Trypsin-1 | PRSS1 |
| Danshen | MOL007059 | 3-beta-Hydroxymethyllenetanshiquinone | Nuclear receptor coactivator 1 | NCOA1 |
| Danshen | MOL007061 | Methylenetanshinquinone | D(1A) dopamine receptor | DRD1 |
| Danshen | MOL007061 | Methylenetanshinquinone | Muscarinic acetylcholine receptor M3 | CHRM3 |
| Danshen | MOL007061 | Methylenetanshinquinone | Prothrombin | F2 |
| Danshen | MOL007061 | Methylenetanshinquinone | Muscarinic acetylcholine receptor M1 | CHRM1 |
| Danshen | MOL007061 | Methylenetanshinquinone | Sodium channel protein type 5 subunit alpha | SCN5A |
| Danshen | MOL007061 | Methylenetanshinquinone | Muscarinic acetylcholine receptor M5 | CHRM5 |
| Danshen | MOL007061 | Methylenetanshinquinone | Prostaglandin G/H synthase 2 | PTGS2 |
| Danshen | MOL007061 | Methylenetanshinquinone | Carbonic anhydrase 2 | CA2 |
| Danshen | MOL007061 | Methylenetanshinquinone | Retinoic acid receptor RXR-alpha | RXRA |
| Danshen | MOL007061 | Methylenetanshinquinone | Delta-type opioid receptor | OPRD1 |
| Danshen | MOL007061 | Methylenetanshinquinone | Acetylcholinesterase | ACHE |
| Danshen | MOL007061 | Methylenetanshinquinone | Alpha-1A adrenergic receptor | ADRA1A |
| Danshen | MOL007061 | Methylenetanshinquinone | Muscarinic acetylcholine receptor M2 | CHRM2 |
| Danshen | MOL007061 | Methylenetanshinquinone | Beta-2 adrenergic receptor | ADRB2 |
| Danshen | MOL007061 | Methylenetanshinquinone | Sodium-dependent serotonin transporter | SLC6A4 |
| Danshen | MOL007061 | Methylenetanshinquinone | Mu-type opioid receptor | OPRM1 |
| Danshen | MOL007061 | Methylenetanshinquinone | Dipeptidyl peptidase 4 | DPP4 |
| Danshen | MOL007061 | Methylenetanshinquinone | Heat shock protein HSP 90-alpha | HSP90AA1 |
| Danshen | MOL007061 | Methylenetanshinquinone | Neuronal acetylcholine receptor subunit alpha-7 | CHRNA7 |
| Danshen | MOL007061 | Methylenetanshinquinone | Trypsin-1 | PRSS1 |
| Danshen | MOL007061 | Methylenetanshinquinone | Nuclear receptor coactivator 1 | NCOA1 |
| Danshen | MOL007063 | przewalskin a | Mineralocorticoid receptor | NR3C2 |
| Danshen | MOL007063 | przewalskin a | Glucocorticoid receptor | NR3C1 |
| Danshen | MOL007064 | przewalskin b | Prostaglandin G/H synthase 2 | PTGS2 |
| Danshen | MOL007064 | przewalskin b | Progesterone receptor | PGR |
| Danshen | MOL007064 | przewalskin b | Mineralocorticoid receptor | NR3C2 |
| Danshen | MOL007064 | przewalskin b | Glucocorticoid receptor | NR3C1 |
| Danshen | MOL007064 | przewalskin b | Nuclear receptor coactivator 2 | NCOA2 |
| Danshen | MOL007064 | przewalskin b | Nuclear receptor coactivator 1 | NCOA1 |
| Danshen | MOL007068 | Przewaquinone B | Prothrombin | F2 |
| Danshen | MOL007068 | Przewaquinone B | Prostaglandin G/H synthase 2 | PTGS2 |
| Danshen | MOL007068 | Przewaquinone B | Retinoic acid receptor RXR-alpha | RXRA |
| Danshen | MOL007068 | Przewaquinone B | Dipeptidyl peptidase 4 | DPP4 |
| Danshen | MOL007068 | Przewaquinone B | Heat shock protein HSP 90-alpha | HSP90AA1 |
| Danshen | MOL007068 | Przewaquinone B | Trypsin-1 | PRSS1 |
| Danshen | MOL007068 | Przewaquinone B | Nuclear receptor coactivator 1 | NCOA1 |
| Danshen | MOL007069 | przewaquinone c | Prostaglandin G/H synthase 1 | PTGS1 |
| Danshen | MOL007069 | przewaquinone c | D(1A) dopamine receptor | DRD1 |
| Danshen | MOL007069 | przewaquinone c | Muscarinic acetylcholine receptor M3 | CHRM3 |
| Danshen | MOL007069 | przewaquinone c | Prothrombin | F2 |
| Danshen | MOL007069 | przewaquinone c | Muscarinic acetylcholine receptor M1 | CHRM1 |
| Danshen | MOL007069 | przewaquinone c | Sodium channel protein type 5 subunit alpha | SCN5A |
| Danshen | MOL007069 | przewaquinone c | Muscarinic acetylcholine receptor M5 | CHRM5 |
| Danshen | MOL007069 | przewaquinone c | Prostaglandin G/H synthase 2 | PTGS2 |
| Danshen | MOL007069 | przewaquinone c | Carbonic anhydrase 2 | CA2 |
| Danshen | MOL007069 | przewaquinone c | Muscarinic acetylcholine receptor M4 | CHRM4 |
| Danshen | MOL007069 | przewaquinone c | Delta-type opioid receptor | OPRD1 |
| Danshen | MOL007069 | przewaquinone c | Acetylcholinesterase | ACHE |
| Danshen | MOL007069 | przewaquinone c | Alpha-1A adrenergic receptor | ADRA1A |
| Danshen | MOL007069 | przewaquinone c | Muscarinic acetylcholine receptor M2 | CHRM2 |
| Danshen | MOL007069 | przewaquinone c | Beta-2 adrenergic receptor | ADRB2 |
| Danshen | MOL007069 | przewaquinone c | Mu-type opioid receptor | OPRM1 |
| Danshen | MOL007069 | przewaquinone c | Dipeptidyl peptidase 4 | DPP4 |
| Danshen | MOL007069 | przewaquinone c | Heat shock protein HSP 90-alpha | HSP90AA1 |
| Danshen | MOL007069 | przewaquinone c | Neuronal acetylcholine receptor subunit alpha-7 | CHRNA7 |
| Danshen | MOL007069 | przewaquinone c | Nuclear receptor coactivator 1 | NCOA1 |
| Danshen | MOL007070 | (6S,7R)-6,7-dihydroxy-1,6-dimethyl-8,9-dihydro-7H-naphtho[8,7-g]benzofuran-10,11-dione | Prothrombin | F2 |
| Danshen | MOL007070 | (6S,7R)-6,7-dihydroxy-1,6-dimethyl-8,9-dihydro-7H-naphtho[8,7-g]benzofuran-10,11-dione | Prostaglandin G/H synthase 2 | PTGS2 |
| Danshen | MOL007070 | (6S,7R)-6,7-dihydroxy-1,6-dimethyl-8,9-dihydro-7H-naphtho[8,7-g]benzofuran-10,11-dione | Carbonic anhydrase 2 | CA2 |
| Danshen | MOL007070 | (6S,7R)-6,7-dihydroxy-1,6-dimethyl-8,9-dihydro-7H-naphtho[8,7-g]benzofuran-10,11-dione | Acetylcholinesterase | ACHE |
| Danshen | MOL007070 | (6S,7R)-6,7-dihydroxy-1,6-dimethyl-8,9-dihydro-7H-naphtho[8,7-g]benzofuran-10,11-dione | Dipeptidyl peptidase 4 | DPP4 |
| Danshen | MOL007070 | (6S,7R)-6,7-dihydroxy-1,6-dimethyl-8,9-dihydro-7H-naphtho[8,7-g]benzofuran-10,11-dione | Heat shock protein HSP 90-alpha | HSP90AA1 |
| Danshen | MOL007070 | (6S,7R)-6,7-dihydroxy-1,6-dimethyl-8,9-dihydro-7H-naphtho[8,7-g]benzofuran-10,11-dione | Trypsin-1 | PRSS1 |
| Danshen | MOL007070 | (6S,7R)-6,7-dihydroxy-1,6-dimethyl-8,9-dihydro-7H-naphtho[8,7-g]benzofuran-10,11-dione | Nuclear receptor coactivator 1 | NCOA1 |
| Danshen | MOL007071 | przewaquinone f | Prothrombin | F2 |
| Danshen | MOL007071 | przewaquinone f | Prostaglandin G/H synthase 2 | PTGS2 |
| Danshen | MOL007071 | przewaquinone f | Dipeptidyl peptidase 4 | DPP4 |
| Danshen | MOL007071 | przewaquinone f | Trypsin-1 | PRSS1 |
| Danshen | MOL007071 | przewaquinone f | Nuclear receptor coactivator 1 | NCOA1 |
| Danshen | MOL007077 | sclareol | Prostaglandin G/H synthase 2 | PTGS2 |
| Danshen | MOL007079 | tanshinaldehyde | D(1A) dopamine receptor | DRD1 |
| Danshen | MOL007079 | tanshinaldehyde | Prothrombin | F2 |
| Danshen | MOL007079 | tanshinaldehyde | Muscarinic acetylcholine receptor M1 | CHRM1 |
| Danshen | MOL007079 | tanshinaldehyde | Prostaglandin G/H synthase 2 | PTGS2 |
| Danshen | MOL007079 | tanshinaldehyde | Delta-type opioid receptor | OPRD1 |
| Danshen | MOL007079 | tanshinaldehyde | Acetylcholinesterase | ACHE |
| Danshen | MOL007079 | tanshinaldehyde | Beta-2 adrenergic receptor | ADRB2 |
| Danshen | MOL007079 | tanshinaldehyde | Mu-type opioid receptor | OPRM1 |
| Danshen | MOL007079 | tanshinaldehyde | Dipeptidyl peptidase 4 | DPP4 |
| Danshen | MOL007079 | tanshinaldehyde | Neuronal acetylcholine receptor subunit alpha-7 | CHRNA7 |
| Danshen | MOL007079 | tanshinaldehyde | Trypsin-1 | PRSS1 |
| Danshen | MOL007079 | tanshinaldehyde | Nuclear receptor coactivator 1 | NCOA1 |
| Danshen | MOL007081 | Danshenol B | Prostaglandin G/H synthase 2 | PTGS2 |
| Danshen | MOL007081 | Danshenol B | Carbonic anhydrase 2 | CA2 |
| Danshen | MOL007081 | Danshenol B | Progesterone receptor | PGR |
| Danshen | MOL007081 | Danshenol B | DNA topoisomerase 2-alpha | TOP2A |
| Danshen | MOL007081 | Danshenol B | Mu-type opioid receptor | OPRM1 |
| Danshen | MOL007081 | Danshenol B | Glucocorticoid receptor | NR3C1 |
| Danshen | MOL007081 | Danshenol B | Heat shock protein HSP 90-alpha | HSP90AA1 |
| Danshen | MOL007081 | Danshenol B | Nuclear receptor coactivator 1 | NCOA1 |
| Danshen | MOL007082 | Danshenol A | Prostaglandin G/H synthase 1 | PTGS1 |
| Danshen | MOL007082 | Danshenol A | Potassium voltage-gated channel subfamily H member 2 | KCNH2 |
| Danshen | MOL007082 | Danshenol A | Sodium channel protein type 5 subunit alpha | SCN5A |
| Danshen | MOL007082 | Danshenol A | Coagulation factor X | F10 |
| Danshen | MOL007082 | Danshenol A | Prostaglandin G/H synthase 2 | PTGS2 |
| Danshen | MOL007082 | Danshenol A | Retinoic acid receptor RXR-alpha | RXRA |
| Danshen | MOL007082 | Danshenol A | Nuclear receptor coactivator 1 | NCOA1 |
| Danshen | MOL007085 | Salvilenone | Prostaglandin G/H synthase 1 | PTGS1 |
| Danshen | MOL007085 | Salvilenone | Estrogen receptor | ESR1 |
| Danshen | MOL007085 | Salvilenone | Androgen receptor | AR |
| Danshen | MOL007085 | Salvilenone | Muscarinic acetylcholine receptor M5 | CHRM5 |
| Danshen | MOL007085 | Salvilenone | Prostaglandin G/H synthase 2 | PTGS2 |
| Danshen | MOL007085 | Salvilenone | Estrogen receptor beta | ESR2 |
| Danshen | MOL007088 | cryptotanshinone | Prostaglandin G/H synthase 1 | PTGS1 |
| Danshen | MOL007088 | cryptotanshinone | D(1A) dopamine receptor | DRD1 |
| Danshen | MOL007088 | cryptotanshinone | Muscarinic acetylcholine receptor M3 | CHRM3 |
| Danshen | MOL007088 | cryptotanshinone | Muscarinic acetylcholine receptor M1 | CHRM1 |
| Danshen | MOL007088 | cryptotanshinone | Sodium channel protein type 5 subunit alpha | SCN5A |
| Danshen | MOL007088 | cryptotanshinone | Muscarinic acetylcholine receptor M5 | CHRM5 |
| Danshen | MOL007088 | cryptotanshinone | Prostaglandin G/H synthase 2 | PTGS2 |
| Danshen | MOL007088 | cryptotanshinone | Carbonic anhydrase 2 | CA2 |
| Danshen | MOL007088 | cryptotanshinone | Muscarinic acetylcholine receptor M4 | CHRM4 |
| Danshen | MOL007088 | cryptotanshinone | Delta-type opioid receptor | OPRD1 |
| Danshen | MOL007088 | cryptotanshinone | Alpha-1A adrenergic receptor | ADRA1A |
| Danshen | MOL007088 | cryptotanshinone | Muscarinic acetylcholine receptor M2 | CHRM2 |
| Danshen | MOL007088 | cryptotanshinone | Alpha-1B adrenergic receptor | ADRA1B |
| Danshen | MOL007088 | cryptotanshinone | Beta-2 adrenergic receptor | ADRB2 |
| Danshen | MOL007088 | cryptotanshinone | Alpha-1D adrenergic receptor | ADRA1D |
| Danshen | MOL007088 | cryptotanshinone | DNA topoisomerase 2-alpha | TOP2A |
| Danshen | MOL007088 | cryptotanshinone | Mu-type opioid receptor | OPRM1 |
| Danshen | MOL007088 | cryptotanshinone | Neuronal acetylcholine receptor subunit alpha-7 | CHRNA7 |
| Danshen | MOL007088 | cryptotanshinone | Nuclear receptor coactivator 2 | NCOA2 |
| Danshen | MOL007088 | cryptotanshinone | Nuclear receptor coactivator 1 | NCOA1 |
| Danshen | MOL007088 | cryptotanshinone | Progesterone receptor | PGR |
| Danshen | MOL007088 | cryptotanshinone | Transcription factor p65 | RELA |
| Danshen | MOL007088 | cryptotanshinone | Signal transducer and activator of transcription 3 | STAT3 |
| Danshen | MOL007088 | cryptotanshinone | G1/S-specific cyclin-D1 | CCND1 |
| Danshen | MOL007088 | cryptotanshinone | Bcl-2-like protein 1 | BCL2L1 |
| Danshen | MOL007088 | cryptotanshinone | Tumor necrosis factor | TNF |
| Danshen | MOL007088 | cryptotanshinone | Amyloid beta A4 protein | APP |
| Danshen | MOL007088 | cryptotanshinone | Endothelin-1 | EDN1 |
| Danshen | MOL007088 | cryptotanshinone | Baculoviral IAP repeat-containing protein 5 | BIRC5 |
| Danshen | MOL007093 | dan-shexinkum d | Nitric oxide synthase, inducible | NOS2 |
| Danshen | MOL007093 | dan-shexinkum d | Prostaglandin G/H synthase 1 | PTGS1 |
| Danshen | MOL007093 | dan-shexinkum d | Prothrombin | F2 |
| Danshen | MOL007093 | dan-shexinkum d | Potassium voltage-gated channel subfamily H member 2 | KCNH2 |
| Danshen | MOL007093 | dan-shexinkum d | Muscarinic acetylcholine receptor M1 | CHRM1 |
| Danshen | MOL007093 | dan-shexinkum d | Estrogen receptor | ESR1 |
| Danshen | MOL007093 | dan-shexinkum d | Androgen receptor | AR |
| Danshen | MOL007093 | dan-shexinkum d | Sodium channel protein type 5 subunit alpha | SCN5A |
| Danshen | MOL007093 | dan-shexinkum d | Peroxisome proliferator-activated receptor gamma | PPARG |
| Danshen | MOL007093 | dan-shexinkum d | Coagulation factor X | F10 |
| Danshen | MOL007093 | dan-shexinkum d | Prostaglandin G/H synthase 2 | PTGS2 |
| Danshen | MOL007093 | dan-shexinkum d | Carbonic anhydrase 2 | CA2 |
| Danshen | MOL007093 | dan-shexinkum d | Retinoic acid receptor RXR-alpha | RXRA |
| Danshen | MOL007093 | dan-shexinkum d | Acetylcholinesterase | ACHE |
| Danshen | MOL007093 | dan-shexinkum d | Alpha-1B adrenergic receptor | ADRA1B |
| Danshen | MOL007093 | dan-shexinkum d | Beta-2 adrenergic receptor | ADRB2 |
| Danshen | MOL007093 | dan-shexinkum d | DNA topoisomerase 2-alpha | TOP2A |
| Danshen | MOL007093 | dan-shexinkum d | Estrogen receptor beta | ESR2 |
| Danshen | MOL007093 | dan-shexinkum d | Dipeptidyl peptidase 4 | DPP4 |
| Danshen | MOL007093 | dan-shexinkum d | Glycogen synthase kinase-3 beta | GSK3B |
| Danshen | MOL007093 | dan-shexinkum d | Serine/threonine-protein kinase Chk1 | CHEK1 |
| Danshen | MOL007093 | dan-shexinkum d | Trypsin-1 | PRSS1 |
| Danshen | MOL007093 | dan-shexinkum d | Cyclin-A2 | CCNA2 |
| Danshen | MOL007093 | dan-shexinkum d | Nuclear receptor coactivator 2 | NCOA2 |
| Danshen | MOL007093 | dan-shexinkum d | Nuclear receptor coactivator 1 | NCOA1 |
| Danshen | MOL007094 | danshenspiroketallactone | Prostaglandin G/H synthase 1 | PTGS1 |
| Danshen | MOL007094 | danshenspiroketallactone | D(1A) dopamine receptor | DRD1 |
| Danshen | MOL007094 | danshenspiroketallactone | Muscarinic acetylcholine receptor M3 | CHRM3 |
| Danshen | MOL007094 | danshenspiroketallactone | Prothrombin | F2 |
| Danshen | MOL007094 | danshenspiroketallactone | Muscarinic acetylcholine receptor M1 | CHRM1 |
| Danshen | MOL007094 | danshenspiroketallactone | Estrogen receptor | ESR1 |
| Danshen | MOL007094 | danshenspiroketallactone | Sodium channel protein type 5 subunit alpha | SCN5A |
| Danshen | MOL007094 | danshenspiroketallactone | Muscarinic acetylcholine receptor M5 | CHRM5 |
| Danshen | MOL007094 | danshenspiroketallactone | Prostaglandin G/H synthase 2 | PTGS2 |
| Danshen | MOL007094 | danshenspiroketallactone | Carbonic anhydrase 2 | CA2 |
| Danshen | MOL007094 | danshenspiroketallactone | Muscarinic acetylcholine receptor M4 | CHRM4 |
| Danshen | MOL007094 | danshenspiroketallactone | Retinoic acid receptor RXR-alpha | RXRA |
| Danshen | MOL007094 | danshenspiroketallactone | Acetylcholinesterase | ACHE |
| Danshen | MOL007094 | danshenspiroketallactone | Alpha-1A adrenergic receptor | ADRA1A |
| Danshen | MOL007094 | danshenspiroketallactone | Muscarinic acetylcholine receptor M2 | CHRM2 |
| Danshen | MOL007094 | danshenspiroketallactone | Alpha-1B adrenergic receptor | ADRA1B |
| Danshen | MOL007094 | danshenspiroketallactone | Beta-2 adrenergic receptor | ADRB2 |
| Danshen | MOL007094 | danshenspiroketallactone | Alpha-1D adrenergic receptor | ADRA1D |
| Danshen | MOL007094 | danshenspiroketallactone | Neuronal acetylcholine receptor subunit alpha-2 | CHRNA2 |
| Danshen | MOL007094 | danshenspiroketallactone | Sodium-dependent serotonin transporter | SLC6A4 |
| Danshen | MOL007094 | danshenspiroketallactone | Mu-type opioid receptor | OPRM1 |
| Danshen | MOL007094 | danshenspiroketallactone | Dipeptidyl peptidase 4 | DPP4 |
| Danshen | MOL007094 | danshenspiroketallactone | Heat shock protein HSP 90-alpha | HSP90AA1 |
| Danshen | MOL007094 | danshenspiroketallactone | Neuronal acetylcholine receptor subunit alpha-7 | CHRNA7 |
| Danshen | MOL007098 | deoxyneocryptotanshinone | Prostaglandin G/H synthase 1 | PTGS1 |
| Danshen | MOL007098 | deoxyneocryptotanshinone | D(1A) dopamine receptor | DRD1 |
| Danshen | MOL007098 | deoxyneocryptotanshinone | Muscarinic acetylcholine receptor M3 | CHRM3 |
| Danshen | MOL007098 | deoxyneocryptotanshinone | Muscarinic acetylcholine receptor M1 | CHRM1 |
| Danshen | MOL007098 | deoxyneocryptotanshinone | Estrogen receptor | ESR1 |
| Danshen | MOL007098 | deoxyneocryptotanshinone | Androgen receptor | AR |
| Danshen | MOL007098 | deoxyneocryptotanshinone | Sodium channel protein type 5 subunit alpha | SCN5A |
| Danshen | MOL007098 | deoxyneocryptotanshinone | Muscarinic acetylcholine receptor M5 | CHRM5 |
| Danshen | MOL007098 | deoxyneocryptotanshinone | Prostaglandin G/H synthase 2 | PTGS2 |
| Danshen | MOL007098 | deoxyneocryptotanshinone | Carbonic anhydrase 2 | CA2 |
| Danshen | MOL007098 | deoxyneocryptotanshinone | Muscarinic acetylcholine receptor M4 | CHRM4 |
| Danshen | MOL007098 | deoxyneocryptotanshinone | Retinoic acid receptor RXR-alpha | RXRA |
| Danshen | MOL007098 | deoxyneocryptotanshinone | Delta-type opioid receptor | OPRD1 |
| Danshen | MOL007098 | deoxyneocryptotanshinone | Alpha-1A adrenergic receptor | ADRA1A |
| Danshen | MOL007098 | deoxyneocryptotanshinone | Muscarinic acetylcholine receptor M2 | CHRM2 |
| Danshen | MOL007098 | deoxyneocryptotanshinone | Alpha-1B adrenergic receptor | ADRA1B |
| Danshen | MOL007098 | deoxyneocryptotanshinone | Beta-2 adrenergic receptor | ADRB2 |
| Danshen | MOL007098 | deoxyneocryptotanshinone | Alpha-1D adrenergic receptor | ADRA1D |
| Danshen | MOL007098 | deoxyneocryptotanshinone | DNA topoisomerase 2-alpha | TOP2A |
| Danshen | MOL007098 | deoxyneocryptotanshinone | Mu-type opioid receptor | OPRM1 |
| Danshen | MOL007098 | deoxyneocryptotanshinone | Glycogen synthase kinase-3 beta | GSK3B |
| Danshen | MOL007098 | deoxyneocryptotanshinone | Neuronal acetylcholine receptor subunit alpha-7 | CHRNA7 |
| Danshen | MOL007098 | deoxyneocryptotanshinone | Nuclear receptor coactivator 2 | NCOA2 |
| Danshen | MOL007098 | deoxyneocryptotanshinone | Nuclear receptor coactivator 1 | NCOA1 |
| Danshen | MOL007100 | dihydrotanshinlactone | Nitric oxide synthase, inducible | NOS2 |
| Danshen | MOL007100 | dihydrotanshinlactone | Prostaglandin G/H synthase 1 | PTGS1 |
| Danshen | MOL007100 | dihydrotanshinlactone | D(1A) dopamine receptor | DRD1 |
| Danshen | MOL007100 | dihydrotanshinlactone | Muscarinic acetylcholine receptor M3 | CHRM3 |
| Danshen | MOL007100 | dihydrotanshinlactone | Prothrombin | F2 |
| Danshen | MOL007100 | dihydrotanshinlactone | Muscarinic acetylcholine receptor M1 | CHRM1 |
| Danshen | MOL007100 | dihydrotanshinlactone | Estrogen receptor | ESR1 |
| Danshen | MOL007100 | dihydrotanshinlactone | Androgen receptor | AR |
| Danshen | MOL007100 | dihydrotanshinlactone | Sodium channel protein type 5 subunit alpha | SCN5A |
| Danshen | MOL007100 | dihydrotanshinlactone | Peroxisome proliferator-activated receptor gamma | PPARG |
| Danshen | MOL007100 | dihydrotanshinlactone | Muscarinic acetylcholine receptor M5 | CHRM5 |
| Danshen | MOL007100 | dihydrotanshinlactone | Prostaglandin G/H synthase 2 | PTGS2 |
| Danshen | MOL007100 | dihydrotanshinlactone | Carbonic anhydrase 2 | CA2 |
| Danshen | MOL007100 | dihydrotanshinlactone | Retinoic acid receptor RXR-alpha | RXRA |
| Danshen | MOL007100 | dihydrotanshinlactone | Acetylcholinesterase | ACHE |
| Danshen | MOL007100 | dihydrotanshinlactone | cGMP-inhibited 3',5'-cyclic phosphodiesterase A | PDE3A |
| Danshen | MOL007100 | dihydrotanshinlactone | Alpha-1A adrenergic receptor | ADRA1A |
| Danshen | MOL007100 | dihydrotanshinlactone | Alpha-1B adrenergic receptor | ADRA1B |
| Danshen | MOL007100 | dihydrotanshinlactone | Tyrosine-protein phosphatase non-receptor type 1 | PTPN1 |
| Danshen | MOL007100 | dihydrotanshinlactone | Sodium-dependent dopamine transporter | SLC6A3 |
| Danshen | MOL007100 | dihydrotanshinlactone | Beta-2 adrenergic receptor | ADRB2 |
| Danshen | MOL007100 | dihydrotanshinlactone | Alpha-1D adrenergic receptor | ADRA1D |
| Danshen | MOL007100 | dihydrotanshinlactone | Sodium-dependent serotonin transporter | SLC6A4 |
| Danshen | MOL007100 | dihydrotanshinlactone | Mu-type opioid receptor | OPRM1 |
| Danshen | MOL007100 | dihydrotanshinlactone | Dipeptidyl peptidase 4 | DPP4 |
| Danshen | MOL007100 | dihydrotanshinlactone | Glycogen synthase kinase-3 beta | GSK3B |
| Danshen | MOL007100 | dihydrotanshinlactone | Neuronal acetylcholine receptor subunit alpha-7 | CHRNA7 |
| Danshen | MOL007100 | dihydrotanshinlactone | cAMP-dependent protein kinase catalytic subunit alpha | PRKACA |
| Danshen | MOL007100 | dihydrotanshinlactone | Trypsin-1 | PRSS1 |
| Danshen | MOL007100 | dihydrotanshinlactone | Cyclin-A2 | CCNA2 |
| Danshen | MOL007101 | dihydrotanshinoneⅠ | Prostaglandin G/H synthase 1 | PTGS1 |
| Danshen | MOL007101 | dihydrotanshinoneⅠ | Sodium channel protein type 5 subunit alpha | SCN5A |
| Danshen | MOL007101 | dihydrotanshinoneⅠ | Prostaglandin G/H synthase 2 | PTGS2 |
| Danshen | MOL007101 | dihydrotanshinoneⅠ | Retinoic acid receptor RXR-alpha | RXRA |
| Danshen | MOL007101 | dihydrotanshinoneⅠ | Alpha-1A adrenergic receptor | ADRA1A |
| Danshen | MOL007101 | dihydrotanshinoneⅠ | Alpha-1B adrenergic receptor | ADRA1B |
| Danshen | MOL007101 | dihydrotanshinoneⅠ | Beta-2 adrenergic receptor | ADRB2 |
| Danshen | MOL007101 | dihydrotanshinoneⅠ | Heat shock protein HSP 90-alpha | HSP90AA1 |
| Danshen | MOL007101 | dihydrotanshinoneⅠ | Neuronal acetylcholine receptor subunit alpha-7 | CHRNA7 |
| Danshen | MOL007101 | dihydrotanshinoneⅠ | cAMP-dependent protein kinase catalytic subunit alpha | PRKACA |
| Danshen | MOL007101 | dihydrotanshinoneⅠ | Nuclear receptor coactivator 2 | NCOA2 |
| Danshen | MOL007101 | dihydrotanshinoneⅠ | Nuclear receptor coactivator 1 | NCOA1 |
| Danshen | MOL007105 | epidanshenspiroketallactone | Prostaglandin G/H synthase 1 | PTGS1 |
| Danshen | MOL007105 | epidanshenspiroketallactone | D(1A) dopamine receptor | DRD1 |
| Danshen | MOL007105 | epidanshenspiroketallactone | Muscarinic acetylcholine receptor M3 | CHRM3 |
| Danshen | MOL007105 | epidanshenspiroketallactone | Muscarinic acetylcholine receptor M1 | CHRM1 |
| Danshen | MOL007105 | epidanshenspiroketallactone | Estrogen receptor | ESR1 |
| Danshen | MOL007105 | epidanshenspiroketallactone | Sodium channel protein type 5 subunit alpha | SCN5A |
| Danshen | MOL007105 | epidanshenspiroketallactone | Muscarinic acetylcholine receptor M5 | CHRM5 |
| Danshen | MOL007105 | epidanshenspiroketallactone | Prostaglandin G/H synthase 2 | PTGS2 |
| Danshen | MOL007105 | epidanshenspiroketallactone | Muscarinic acetylcholine receptor M4 | CHRM4 |
| Danshen | MOL007105 | epidanshenspiroketallactone | Retinoic acid receptor RXR-alpha | RXRA |
| Danshen | MOL007105 | epidanshenspiroketallactone | Delta-type opioid receptor | OPRD1 |
| Danshen | MOL007105 | epidanshenspiroketallactone | cGMP-inhibited 3',5'-cyclic phosphodiesterase A | PDE3A |
| Danshen | MOL007105 | epidanshenspiroketallactone | Alpha-1A adrenergic receptor | ADRA1A |
| Danshen | MOL007105 | epidanshenspiroketallactone | Muscarinic acetylcholine receptor M2 | CHRM2 |
| Danshen | MOL007105 | epidanshenspiroketallactone | Alpha-1B adrenergic receptor | ADRA1B |
| Danshen | MOL007105 | epidanshenspiroketallactone | Beta-2 adrenergic receptor | ADRB2 |
| Danshen | MOL007105 | epidanshenspiroketallactone | Alpha-1D adrenergic receptor | ADRA1D |
| Danshen | MOL007105 | epidanshenspiroketallactone | Sodium-dependent serotonin transporter | SLC6A4 |
| Danshen | MOL007105 | epidanshenspiroketallactone | Mu-type opioid receptor | OPRM1 |
| Danshen | MOL007105 | epidanshenspiroketallactone | Heat shock protein HSP 90-alpha | HSP90AA1 |
| Danshen | MOL007105 | epidanshenspiroketallactone | Neuronal acetylcholine receptor subunit alpha-7 | CHRNA7 |
| Danshen | MOL007107 | C09092 | Muscarinic acetylcholine receptor M3 | CHRM3 |
| Danshen | MOL007107 | C09092 | Prothrombin | F2 |
| Danshen | MOL007107 | C09092 | Muscarinic acetylcholine receptor M1 | CHRM1 |
| Danshen | MOL007107 | C09092 | Sodium channel protein type 5 subunit alpha | SCN5A |
| Danshen | MOL007107 | C09092 | Carbonic anhydrase 2 | CA2 |
| Danshen | MOL007107 | C09092 | Acetylcholinesterase | ACHE |
| Danshen | MOL007107 | C09092 | Alpha-1A adrenergic receptor | ADRA1A |
| Danshen | MOL007107 | C09092 | Muscarinic acetylcholine receptor M2 | CHRM2 |
| Danshen | MOL007107 | C09092 | Alpha-1B adrenergic receptor | ADRA1B |
| Danshen | MOL007107 | C09092 | Beta-2 adrenergic receptor | ADRB2 |
| Danshen | MOL007107 | C09092 | Alpha-1D adrenergic receptor | ADRA1D |
| Danshen | MOL007107 | C09092 | Mu-type opioid receptor | OPRM1 |
| Danshen | MOL007108 | isocryptotanshi-none | Nitric oxide synthase, inducible | NOS2 |
| Danshen | MOL007108 | isocryptotanshi-none | Prostaglandin G/H synthase 1 | PTGS1 |
| Danshen | MOL007108 | isocryptotanshi-none | D(1A) dopamine receptor | DRD1 |
| Danshen | MOL007108 | isocryptotanshi-none | Muscarinic acetylcholine receptor M3 | CHRM3 |
| Danshen | MOL007108 | isocryptotanshi-none | Muscarinic acetylcholine receptor M1 | CHRM1 |
| Danshen | MOL007108 | isocryptotanshi-none | Estrogen receptor | ESR1 |
| Danshen | MOL007108 | isocryptotanshi-none | Androgen receptor | AR |
| Danshen | MOL007108 | isocryptotanshi-none | Sodium channel protein type 5 subunit alpha | SCN5A |
| Danshen | MOL007108 | isocryptotanshi-none | Coagulation factor X | F10 |
| Danshen | MOL007108 | isocryptotanshi-none | Muscarinic acetylcholine receptor M5 | CHRM5 |
| Danshen | MOL007108 | isocryptotanshi-none | Prostaglandin G/H synthase 2 | PTGS2 |
| Danshen | MOL007108 | isocryptotanshi-none | Carbonic anhydrase 2 | CA2 |
| Danshen | MOL007108 | isocryptotanshi-none | Muscarinic acetylcholine receptor M4 | CHRM4 |
| Danshen | MOL007108 | isocryptotanshi-none | Retinoic acid receptor RXR-alpha | RXRA |
| Danshen | MOL007108 | isocryptotanshi-none | Delta-type opioid receptor | OPRD1 |
| Danshen | MOL007108 | isocryptotanshi-none | Acetylcholinesterase | ACHE |
| Danshen | MOL007108 | isocryptotanshi-none | Alpha-1A adrenergic receptor | ADRA1A |
| Danshen | MOL007108 | isocryptotanshi-none | Muscarinic acetylcholine receptor M2 | CHRM2 |
| Danshen | MOL007108 | isocryptotanshi-none | Alpha-1B adrenergic receptor | ADRA1B |
| Danshen | MOL007108 | isocryptotanshi-none | Beta-2 adrenergic receptor | ADRB2 |
| Danshen | MOL007108 | isocryptotanshi-none | Alpha-1D adrenergic receptor | ADRA1D |
| Danshen | MOL007108 | isocryptotanshi-none | DNA topoisomerase 2-alpha | TOP2A |
| Danshen | MOL007108 | isocryptotanshi-none | D(2) dopamine receptor | DRD2 |
| Danshen | MOL007108 | isocryptotanshi-none | Mu-type opioid receptor | OPRM1 |
| Danshen | MOL007108 | isocryptotanshi-none | Neuronal acetylcholine receptor subunit alpha-7 | CHRNA7 |
| Danshen | MOL007108 | isocryptotanshi-none | Trypsin-1 | PRSS1 |
| Danshen | MOL007108 | isocryptotanshi-none | Nuclear receptor coactivator 2 | NCOA2 |
| Danshen | MOL007108 | isocryptotanshi-none | Nuclear receptor coactivator 1 | NCOA1 |
| Danshen | MOL007111 | Isotanshinone II | Nitric oxide synthase, inducible | NOS2 |
| Danshen | MOL007111 | Isotanshinone II | D(1A) dopamine receptor | DRD1 |
| Danshen | MOL007111 | Isotanshinone II | Muscarinic acetylcholine receptor M3 | CHRM3 |
| Danshen | MOL007111 | Isotanshinone II | Prothrombin | F2 |
| Danshen | MOL007111 | Isotanshinone II | Muscarinic acetylcholine receptor M1 | CHRM1 |
| Danshen | MOL007111 | Isotanshinone II | Estrogen receptor | ESR1 |
| Danshen | MOL007111 | Isotanshinone II | Androgen receptor | AR |
| Danshen | MOL007111 | Isotanshinone II | Sodium channel protein type 5 subunit alpha | SCN5A |
| Danshen | MOL007111 | Isotanshinone II | Muscarinic acetylcholine receptor M5 | CHRM5 |
| Danshen | MOL007111 | Isotanshinone II | Prostaglandin G/H synthase 2 | PTGS2 |
| Danshen | MOL007111 | Isotanshinone II | Retinoic acid receptor RXR-alpha | RXRA |
| Danshen | MOL007111 | Isotanshinone II | Delta-type opioid receptor | OPRD1 |
| Danshen | MOL007111 | Isotanshinone II | Acetylcholinesterase | ACHE |
| Danshen | MOL007111 | Isotanshinone II | Alpha-1A adrenergic receptor | ADRA1A |
| Danshen | MOL007111 | Isotanshinone II | Muscarinic acetylcholine receptor M2 | CHRM2 |
| Danshen | MOL007111 | Isotanshinone II | Beta-2 adrenergic receptor | ADRB2 |
| Danshen | MOL007111 | Isotanshinone II | Mu-type opioid receptor | OPRM1 |
| Danshen | MOL007111 | Isotanshinone II | Estrogen receptor beta | ESR2 |
| Danshen | MOL007111 | Isotanshinone II | Dipeptidyl peptidase 4 | DPP4 |
| Danshen | MOL007111 | Isotanshinone II | Glycogen synthase kinase-3 beta | GSK3B |
| Danshen | MOL007111 | Isotanshinone II | Neuronal acetylcholine receptor subunit alpha-7 | CHRNA7 |
| Danshen | MOL007111 | Isotanshinone II | Serine/threonine-protein kinase Chk1 | CHEK1 |
| Danshen | MOL007111 | Isotanshinone II | Cyclin-A2 | CCNA2 |
| Danshen | MOL007115 | manool | Nuclear receptor coactivator 2 | NCOA2 |
| Danshen | MOL007119 | miltionone Ⅰ | Prostaglandin G/H synthase 1 | PTGS1 |
| Danshen | MOL007119 | miltionone Ⅰ | Muscarinic acetylcholine receptor M3 | CHRM3 |
| Danshen | MOL007119 | miltionone Ⅰ | Muscarinic acetylcholine receptor M1 | CHRM1 |
| Danshen | MOL007119 | miltionone Ⅰ | Estrogen receptor | ESR1 |
| Danshen | MOL007119 | miltionone Ⅰ | Androgen receptor | AR |
| Danshen | MOL007119 | miltionone Ⅰ | Sodium channel protein type 5 subunit alpha | SCN5A |
| Danshen | MOL007119 | miltionone Ⅰ | Coagulation factor X | F10 |
| Danshen | MOL007119 | miltionone Ⅰ | Prostaglandin G/H synthase 2 | PTGS2 |
| Danshen | MOL007119 | miltionone Ⅰ | Carbonic anhydrase 2 | CA2 |
| Danshen | MOL007119 | miltionone Ⅰ | Retinoic acid receptor RXR-alpha | RXRA |
| Danshen | MOL007119 | miltionone Ⅰ | Delta-type opioid receptor | OPRD1 |
| Danshen | MOL007119 | miltionone Ⅰ | Alpha-1A adrenergic receptor | ADRA1A |
| Danshen | MOL007119 | miltionone Ⅰ | Muscarinic acetylcholine receptor M2 | CHRM2 |
| Danshen | MOL007119 | miltionone Ⅰ | Alpha-1B adrenergic receptor | ADRA1B |
| Danshen | MOL007119 | miltionone Ⅰ | Beta-2 adrenergic receptor | ADRB2 |
| Danshen | MOL007119 | miltionone Ⅰ | DNA topoisomerase 2-alpha | TOP2A |
| Danshen | MOL007119 | miltionone Ⅰ | Mu-type opioid receptor | OPRM1 |
| Danshen | MOL007119 | miltionone Ⅰ | Glucocorticoid receptor | NR3C1 |
| Danshen | MOL007119 | miltionone Ⅰ | Glycogen synthase kinase-3 beta | GSK3B |
| Danshen | MOL007119 | miltionone Ⅰ | Neuronal acetylcholine receptor subunit alpha-7 | CHRNA7 |
| Danshen | MOL007119 | miltionone Ⅰ | Cyclin-A2 | CCNA2 |
| Danshen | MOL007119 | miltionone Ⅰ | Nuclear receptor coactivator 2 | NCOA2 |
| Danshen | MOL007119 | miltionone Ⅰ | Nuclear receptor coactivator 1 | NCOA1 |
| Danshen | MOL007120 | miltionone Ⅱ | Prothrombin | F2 |
| Danshen | MOL007120 | miltionone Ⅱ | Prostaglandin G/H synthase 2 | PTGS2 |
| Danshen | MOL007120 | miltionone Ⅱ | Carbonic anhydrase 2 | CA2 |
| Danshen | MOL007120 | miltionone Ⅱ | Acetylcholinesterase | ACHE |
| Danshen | MOL007120 | miltionone Ⅱ | Progesterone receptor | PGR |
| Danshen | MOL007120 | miltionone Ⅱ | Glucocorticoid receptor | NR3C1 |
| Danshen | MOL007120 | miltionone Ⅱ | Nuclear receptor coactivator 2 | NCOA2 |
| Danshen | MOL007120 | miltionone Ⅱ | Nuclear receptor coactivator 1 | NCOA1 |
| Danshen | MOL007121 | miltipolone | Estrogen receptor | ESR1 |
| Danshen | MOL007121 | miltipolone | Acetylcholinesterase | ACHE |
| Danshen | MOL007122 | Miltirone | Prostaglandin G/H synthase 1 | PTGS1 |
| Danshen | MOL007122 | Miltirone | D(1A) dopamine receptor | DRD1 |
| Danshen | MOL007122 | Miltirone | Muscarinic acetylcholine receptor M3 | CHRM3 |
| Danshen | MOL007122 | Miltirone | Muscarinic acetylcholine receptor M1 | CHRM1 |
| Danshen | MOL007122 | Miltirone | Estrogen receptor | ESR1 |
| Danshen | MOL007122 | Miltirone | Androgen receptor | AR |
| Danshen | MOL007122 | Miltirone | D(1B) dopamine receptor | DRD5 |
| Danshen | MOL007122 | Miltirone | Sodium channel protein type 5 subunit alpha | SCN5A |
| Danshen | MOL007122 | Miltirone | Muscarinic acetylcholine receptor M5 | CHRM5 |
| Danshen | MOL007122 | Miltirone | Prostaglandin G/H synthase 2 | PTGS2 |
| Danshen | MOL007122 | Miltirone | Carbonic anhydrase 2 | CA2 |
| Danshen | MOL007122 | Miltirone | Alpha-2C adrenergic receptor | ADRA2C |
| Danshen | MOL007122 | Miltirone | Muscarinic acetylcholine receptor M4 | CHRM4 |
| Danshen | MOL007122 | Miltirone | Retinoic acid receptor RXR-alpha | RXRA |
| Danshen | MOL007122 | Miltirone | Delta-type opioid receptor | OPRD1 |
| Danshen | MOL007122 | Miltirone | Alpha-1A adrenergic receptor | ADRA1A |
| Danshen | MOL007122 | Miltirone | Muscarinic acetylcholine receptor M2 | CHRM2 |
| Danshen | MOL007122 | Miltirone | Alpha-1B adrenergic receptor | ADRA1B |
| Danshen | MOL007122 | Miltirone | Sodium-dependent dopamine transporter | SLC6A3 |
| Danshen | MOL007122 | Miltirone | Beta-2 adrenergic receptor | ADRB2 |
| Danshen | MOL007122 | Miltirone | Alpha-1D adrenergic receptor | ADRA1D |
| Danshen | MOL007122 | Miltirone | DNA topoisomerase 2-alpha | TOP2A |
| Danshen | MOL007122 | Miltirone | Mu-type opioid receptor | OPRM1 |
| Danshen | MOL007122 | Miltirone | Neuronal acetylcholine receptor subunit alpha-7 | CHRNA7 |
| Danshen | MOL007122 | Miltirone | Nuclear receptor coactivator 2 | NCOA2 |
| Danshen | MOL007124 | neocryptotanshinone ii | Prostaglandin G/H synthase 1 | PTGS1 |
| Danshen | MOL007124 | neocryptotanshinone ii | D(1A) dopamine receptor | DRD1 |
| Danshen | MOL007124 | neocryptotanshinone ii | Muscarinic acetylcholine receptor M3 | CHRM3 |
| Danshen | MOL007124 | neocryptotanshinone ii | Muscarinic acetylcholine receptor M1 | CHRM1 |
| Danshen | MOL007124 | neocryptotanshinone ii | Estrogen receptor | ESR1 |
| Danshen | MOL007124 | neocryptotanshinone ii | Androgen receptor | AR |
| Danshen | MOL007124 | neocryptotanshinone ii | Sodium channel protein type 5 subunit alpha | SCN5A |
| Danshen | MOL007124 | neocryptotanshinone ii | Prostaglandin G/H synthase 2 | PTGS2 |
| Danshen | MOL007124 | neocryptotanshinone ii | Carbonic anhydrase 2 | CA2 |
| Danshen | MOL007124 | neocryptotanshinone ii | Muscarinic acetylcholine receptor M4 | CHRM4 |
| Danshen | MOL007124 | neocryptotanshinone ii | Retinoic acid receptor RXR-alpha | RXRA |
| Danshen | MOL007124 | neocryptotanshinone ii | Delta-type opioid receptor | OPRD1 |
| Danshen | MOL007124 | neocryptotanshinone ii | cGMP-inhibited 3',5'-cyclic phosphodiesterase A | PDE3A |
| Danshen | MOL007124 | neocryptotanshinone ii | Alpha-1A adrenergic receptor | ADRA1A |
| Danshen | MOL007124 | neocryptotanshinone ii | Muscarinic acetylcholine receptor M2 | CHRM2 |
| Danshen | MOL007124 | neocryptotanshinone ii | Alpha-1B adrenergic receptor | ADRA1B |
| Danshen | MOL007124 | neocryptotanshinone ii | Sodium-dependent dopamine transporter | SLC6A3 |
| Danshen | MOL007124 | neocryptotanshinone ii | Beta-2 adrenergic receptor | ADRB2 |
| Danshen | MOL007124 | neocryptotanshinone ii | Alpha-1D adrenergic receptor | ADRA1D |
| Danshen | MOL007124 | neocryptotanshinone ii | Sodium-dependent serotonin transporter | SLC6A4 |
| Danshen | MOL007124 | neocryptotanshinone ii | Mu-type opioid receptor | OPRM1 |
| Danshen | MOL007124 | neocryptotanshinone ii | Glycogen synthase kinase-3 beta | GSK3B |
| Danshen | MOL007124 | neocryptotanshinone ii | Heat shock protein HSP 90-alpha | HSP90AA1 |
| Danshen | MOL007124 | neocryptotanshinone ii | Neuronal acetylcholine receptor subunit alpha-7 | CHRNA7 |
| Danshen | MOL007124 | neocryptotanshinone ii | Cyclin-A2 | CCNA2 |
| Danshen | MOL007125 | neocryptotanshinone | Prostaglandin G/H synthase 1 | PTGS1 |
| Danshen | MOL007125 | neocryptotanshinone | Muscarinic acetylcholine receptor M3 | CHRM3 |
| Danshen | MOL007125 | neocryptotanshinone | Muscarinic acetylcholine receptor M1 | CHRM1 |
| Danshen | MOL007125 | neocryptotanshinone | Sodium channel protein type 5 subunit alpha | SCN5A |
| Danshen | MOL007125 | neocryptotanshinone | Peroxisome proliferator-activated receptor gamma | PPARG |
| Danshen | MOL007125 | neocryptotanshinone | Prostaglandin G/H synthase 2 | PTGS2 |
| Danshen | MOL007125 | neocryptotanshinone | Carbonic anhydrase 2 | CA2 |
| Danshen | MOL007125 | neocryptotanshinone | Alpha-1B adrenergic receptor | ADRA1B |
| Danshen | MOL007125 | neocryptotanshinone | Beta-2 adrenergic receptor | ADRB2 |
| Danshen | MOL007125 | neocryptotanshinone | Alpha-1D adrenergic receptor | ADRA1D |
| Danshen | MOL007125 | neocryptotanshinone | DNA topoisomerase 2-alpha | TOP2A |
| Danshen | MOL007125 | neocryptotanshinone | Mu-type opioid receptor | OPRM1 |
| Danshen | MOL007125 | neocryptotanshinone | Neuronal acetylcholine receptor subunit alpha-7 | CHRNA7 |
| Danshen | MOL007125 | neocryptotanshinone | Nuclear receptor coactivator 2 | NCOA2 |
| Danshen | MOL007125 | neocryptotanshinone | Nuclear receptor coactivator 1 | NCOA1 |
| Danshen | MOL007127 | 1-methyl-8,9-dihydro-7H-naphtho[5,6-g]benzofuran-6,10,11-trione | Prostaglandin G/H synthase 1 | PTGS1 |
| Danshen | MOL007127 | 1-methyl-8,9-dihydro-7H-naphtho[5,6-g]benzofuran-6,10,11-trione | D(1A) dopamine receptor | DRD1 |
| Danshen | MOL007127 | 1-methyl-8,9-dihydro-7H-naphtho[5,6-g]benzofuran-6,10,11-trione | Muscarinic acetylcholine receptor M3 | CHRM3 |
| Danshen | MOL007127 | 1-methyl-8,9-dihydro-7H-naphtho[5,6-g]benzofuran-6,10,11-trione | Prothrombin | F2 |
| Danshen | MOL007127 | 1-methyl-8,9-dihydro-7H-naphtho[5,6-g]benzofuran-6,10,11-trione | Sodium channel protein type 5 subunit alpha | SCN5A |
| Danshen | MOL007127 | 1-methyl-8,9-dihydro-7H-naphtho[5,6-g]benzofuran-6,10,11-trione | Muscarinic acetylcholine receptor M5 | CHRM5 |
| Danshen | MOL007127 | 1-methyl-8,9-dihydro-7H-naphtho[5,6-g]benzofuran-6,10,11-trione | Prostaglandin G/H synthase 2 | PTGS2 |
| Danshen | MOL007127 | 1-methyl-8,9-dihydro-7H-naphtho[5,6-g]benzofuran-6,10,11-trione | Carbonic anhydrase 2 | CA2 |
| Danshen | MOL007127 | 1-methyl-8,9-dihydro-7H-naphtho[5,6-g]benzofuran-6,10,11-trione | Retinoic acid receptor RXR-alpha | RXRA |
| Danshen | MOL007127 | 1-methyl-8,9-dihydro-7H-naphtho[5,6-g]benzofuran-6,10,11-trione | Acetylcholinesterase | ACHE |
| Danshen | MOL007127 | 1-methyl-8,9-dihydro-7H-naphtho[5,6-g]benzofuran-6,10,11-trione | Alpha-1A adrenergic receptor | ADRA1A |
| Danshen | MOL007127 | 1-methyl-8,9-dihydro-7H-naphtho[5,6-g]benzofuran-6,10,11-trione | Beta-2 adrenergic receptor | ADRB2 |
| Danshen | MOL007127 | 1-methyl-8,9-dihydro-7H-naphtho[5,6-g]benzofuran-6,10,11-trione | Mu-type opioid receptor | OPRM1 |
| Danshen | MOL007127 | 1-methyl-8,9-dihydro-7H-naphtho[5,6-g]benzofuran-6,10,11-trione | Dipeptidyl peptidase 4 | DPP4 |
| Danshen | MOL007127 | 1-methyl-8,9-dihydro-7H-naphtho[5,6-g]benzofuran-6,10,11-trione | Heat shock protein HSP 90-alpha | HSP90AA1 |
| Danshen | MOL007127 | 1-methyl-8,9-dihydro-7H-naphtho[5,6-g]benzofuran-6,10,11-trione | Neuronal acetylcholine receptor subunit alpha-7 | CHRNA7 |
| Danshen | MOL007127 | 1-methyl-8,9-dihydro-7H-naphtho[5,6-g]benzofuran-6,10,11-trione | Nuclear receptor coactivator 1 | NCOA1 |
| Danshen | MOL007130 | prolithospermic acid | Nitric oxide synthase, inducible | NOS2 |
| Danshen | MOL007130 | prolithospermic acid | Prostaglandin G/H synthase 1 | PTGS1 |
| Danshen | MOL007130 | prolithospermic acid | Prothrombin | F2 |
| Danshen | MOL007130 | prolithospermic acid | Estrogen receptor | ESR1 |
| Danshen | MOL007130 | prolithospermic acid | Androgen receptor | AR |
| Danshen | MOL007130 | prolithospermic acid | Prostaglandin G/H synthase 2 | PTGS2 |
| Danshen | MOL007130 | prolithospermic acid | Tyrosine-protein phosphatase non-receptor type 1 | PTPN1 |
| Danshen | MOL007130 | prolithospermic acid | Heat shock protein HSP 90-alpha | HSP90AA1 |
| Danshen | MOL007130 | prolithospermic acid | Trypsin-1 | PRSS1 |
| Danshen | MOL007132 | (2R)-3-(3,4-dihydroxyphenyl)-2-[(Z)-3-(3,4-dihydroxyphenyl)acryloyl]oxy-propionic acid | Prothrombin | F2 |
| Danshen | MOL007132 | (2R)-3-(3,4-dihydroxyphenyl)-2-[(Z)-3-(3,4-dihydroxyphenyl)acryloyl]oxy-propionic acid | Estrogen receptor | ESR1 |
| Danshen | MOL007132 | (2R)-3-(3,4-dihydroxyphenyl)-2-[(Z)-3-(3,4-dihydroxyphenyl)acryloyl]oxy-propionic acid | Androgen receptor | AR |
| Danshen | MOL007132 | (2R)-3-(3,4-dihydroxyphenyl)-2-[(Z)-3-(3,4-dihydroxyphenyl)acryloyl]oxy-propionic acid | Peroxisome proliferator-activated receptor gamma | PPARG |
| Danshen | MOL007132 | (2R)-3-(3,4-dihydroxyphenyl)-2-[(Z)-3-(3,4-dihydroxyphenyl)acryloyl]oxy-propionic acid | Prostaglandin G/H synthase 2 | PTGS2 |
| Danshen | MOL007132 | (2R)-3-(3,4-dihydroxyphenyl)-2-[(Z)-3-(3,4-dihydroxyphenyl)acryloyl]oxy-propionic acid | Dipeptidyl peptidase 4 | DPP4 |
| Danshen | MOL007132 | (2R)-3-(3,4-dihydroxyphenyl)-2-[(Z)-3-(3,4-dihydroxyphenyl)acryloyl]oxy-propionic acid | Trypsin-1 | PRSS1 |
| Danshen | MOL007132 | (2R)-3-(3,4-dihydroxyphenyl)-2-[(Z)-3-(3,4-dihydroxyphenyl)acryloyl]oxy-propionic acid | Cyclin-A2 | CCNA2 |
| Danshen | MOL007141 | salvianolic acid g | Prostaglandin G/H synthase 2 | PTGS2 |
| Danshen | MOL007142 | salvianolic acid j | Coagulation factor VII | F7 |
| Danshen | MOL007142 | salvianolic acid j | Tyrosine-protein phosphatase non-receptor type 1 | PTPN1 |
| Danshen | MOL007142 | salvianolic acid j | Trypsin-1 | PRSS1 |
| Danshen | MOL007143 | salvilenone Ⅰ | Prostaglandin G/H synthase 2 | PTGS2 |
| Danshen | MOL007143 | salvilenone Ⅰ | Retinoic acid receptor RXR-alpha | RXRA |
| Danshen | MOL007143 | salvilenone Ⅰ | Acetylcholinesterase | ACHE |
| Danshen | MOL007143 | salvilenone Ⅰ | Progesterone receptor | PGR |
| Danshen | MOL007143 | salvilenone Ⅰ | Tyrosine-protein phosphatase non-receptor type 1 | PTPN1 |
| Danshen | MOL007143 | salvilenone Ⅰ | Glucocorticoid receptor | NR3C1 |
| Danshen | MOL007143 | salvilenone Ⅰ | Nuclear receptor coactivator 2 | NCOA2 |
| Danshen | MOL007143 | salvilenone Ⅰ | Nuclear receptor coactivator 1 | NCOA1 |
| Danshen | MOL007145 | salviolone | Prostaglandin G/H synthase 1 | PTGS1 |
| Danshen | MOL007145 | salviolone | D(1A) dopamine receptor | DRD1 |
| Danshen | MOL007145 | salviolone | Muscarinic acetylcholine receptor M3 | CHRM3 |
| Danshen | MOL007145 | salviolone | Prothrombin | F2 |
| Danshen | MOL007145 | salviolone | Muscarinic acetylcholine receptor M1 | CHRM1 |
| Danshen | MOL007145 | salviolone | D(1B) dopamine receptor | DRD5 |
| Danshen | MOL007145 | salviolone | Sodium channel protein type 5 subunit alpha | SCN5A |
| Danshen | MOL007145 | salviolone | Muscarinic acetylcholine receptor M5 | CHRM5 |
| Danshen | MOL007145 | salviolone | Prostaglandin G/H synthase 2 | PTGS2 |
| Danshen | MOL007145 | salviolone | Alpha-2A adrenergic receptor | ADRA2A |
| Danshen | MOL007145 | salviolone | Muscarinic acetylcholine receptor M4 | CHRM4 |
| Danshen | MOL007145 | salviolone | Delta-type opioid receptor | OPRD1 |
| Danshen | MOL007145 | salviolone | Acetylcholinesterase | ACHE |
| Danshen | MOL007145 | salviolone | cGMP-inhibited 3',5'-cyclic phosphodiesterase A | PDE3A |
| Danshen | MOL007145 | salviolone | Sodium-dependent noradrenaline transporter | SLC6A2 |
| Danshen | MOL007145 | salviolone | Alpha-1A adrenergic receptor | ADRA1A |
| Danshen | MOL007145 | salviolone | Muscarinic acetylcholine receptor M2 | CHRM2 |
| Danshen | MOL007145 | salviolone | Alpha-2B adrenergic receptor | ADRA2B |
| Danshen | MOL007145 | salviolone | Alpha-1B adrenergic receptor | ADRA1B |
| Danshen | MOL007145 | salviolone | Sodium-dependent dopamine transporter | SLC6A3 |
| Danshen | MOL007145 | salviolone | Beta-2 adrenergic receptor | ADRB2 |
| Danshen | MOL007145 | salviolone | Neuronal acetylcholine receptor subunit alpha-2 | CHRNA2 |
| Danshen | MOL007145 | salviolone | Sodium-dependent serotonin transporter | SLC6A4 |
| Danshen | MOL007145 | salviolone | D(2) dopamine receptor | DRD2 |
| Danshen | MOL007145 | salviolone | Mu-type opioid receptor | OPRM1 |
| Danshen | MOL007145 | salviolone | Neuronal acetylcholine receptor subunit alpha-7 | CHRNA7 |
| Danshen | MOL007145 | salviolone | Gamma-aminobutyric acid receptor subunit gamma-3 | GABRG3 |
| Danshen | MOL007145 | salviolone | Gamma-aminobutyric acid receptor subunit epsilon | GABRE |
| Danshen | MOL007150 | (6S)-6-hydroxy-1-methyl-6-methylol-8,9-dihydro-7H-naphtho[8,7-g]benzofuran-10,11-quinone | Prothrombin | F2 |
| Danshen | MOL007150 | (6S)-6-hydroxy-1-methyl-6-methylol-8,9-dihydro-7H-naphtho[8,7-g]benzofuran-10,11-quinone | Prostaglandin G/H synthase 2 | PTGS2 |
| Danshen | MOL007150 | (6S)-6-hydroxy-1-methyl-6-methylol-8,9-dihydro-7H-naphtho[8,7-g]benzofuran-10,11-quinone | Carbonic anhydrase 2 | CA2 |
| Danshen | MOL007150 | (6S)-6-hydroxy-1-methyl-6-methylol-8,9-dihydro-7H-naphtho[8,7-g]benzofuran-10,11-quinone | Acetylcholinesterase | ACHE |
| Danshen | MOL007150 | (6S)-6-hydroxy-1-methyl-6-methylol-8,9-dihydro-7H-naphtho[8,7-g]benzofuran-10,11-quinone | Dipeptidyl peptidase 4 | DPP4 |
| Danshen | MOL007150 | (6S)-6-hydroxy-1-methyl-6-methylol-8,9-dihydro-7H-naphtho[8,7-g]benzofuran-10,11-quinone | Heat shock protein HSP 90-alpha | HSP90AA1 |
| Danshen | MOL007150 | (6S)-6-hydroxy-1-methyl-6-methylol-8,9-dihydro-7H-naphtho[8,7-g]benzofuran-10,11-quinone | Trypsin-1 | PRSS1 |
| Danshen | MOL007150 | (6S)-6-hydroxy-1-methyl-6-methylol-8,9-dihydro-7H-naphtho[8,7-g]benzofuran-10,11-quinone | Nuclear receptor coactivator 1 | NCOA1 |
| Danshen | MOL007151 | Tanshindiol B | Prothrombin | F2 |
| Danshen | MOL007151 | Tanshindiol B | Prostaglandin G/H synthase 2 | PTGS2 |
| Danshen | MOL007151 | Tanshindiol B | Carbonic anhydrase 2 | CA2 |
| Danshen | MOL007151 | Tanshindiol B | Acetylcholinesterase | ACHE |
| Danshen | MOL007151 | Tanshindiol B | Dipeptidyl peptidase 4 | DPP4 |
| Danshen | MOL007151 | Tanshindiol B | Heat shock protein HSP 90-alpha | HSP90AA1 |
| Danshen | MOL007151 | Tanshindiol B | Nuclear receptor coactivator 1 | NCOA1 |
| Danshen | MOL007152 | Przewaquinone E | Prothrombin | F2 |
| Danshen | MOL007152 | Przewaquinone E | Prostaglandin G/H synthase 2 | PTGS2 |
| Danshen | MOL007152 | Przewaquinone E | Carbonic anhydrase 2 | CA2 |
| Danshen | MOL007152 | Przewaquinone E | Acetylcholinesterase | ACHE |
| Danshen | MOL007152 | Przewaquinone E | Dipeptidyl peptidase 4 | DPP4 |
| Danshen | MOL007152 | Przewaquinone E | Heat shock protein HSP 90-alpha | HSP90AA1 |
| Danshen | MOL007152 | Przewaquinone E | Nuclear receptor coactivator 1 | NCOA1 |
| Danshen | MOL007154 | tanshinone iia | D(1A) dopamine receptor | DRD1 |
| Danshen | MOL007154 | tanshinone iia | Muscarinic acetylcholine receptor M3 | CHRM3 |
| Danshen | MOL007154 | tanshinone iia | Prothrombin | F2 |
| Danshen | MOL007154 | tanshinone iia | Muscarinic acetylcholine receptor M1 | CHRM1 |
| Danshen | MOL007154 | tanshinone iia | Sodium channel protein type 5 subunit alpha | SCN5A |
| Danshen | MOL007154 | tanshinone iia | Muscarinic acetylcholine receptor M5 | CHRM5 |
| Danshen | MOL007154 | tanshinone iia | Prostaglandin G/H synthase 2 | PTGS2 |
| Danshen | MOL007154 | tanshinone iia | Muscarinic acetylcholine receptor M4 | CHRM4 |
| Danshen | MOL007154 | tanshinone iia | Delta-type opioid receptor | OPRD1 |
| Danshen | MOL007154 | tanshinone iia | Acetylcholinesterase | ACHE |
| Danshen | MOL007154 | tanshinone iia | Alpha-1A adrenergic receptor | ADRA1A |
| Danshen | MOL007154 | tanshinone iia | Muscarinic acetylcholine receptor M2 | CHRM2 |
| Danshen | MOL007154 | tanshinone iia | Beta-2 adrenergic receptor | ADRB2 |
| Danshen | MOL007154 | tanshinone iia | Mu-type opioid receptor | OPRM1 |
| Danshen | MOL007154 | tanshinone iia | Dipeptidyl peptidase 4 | DPP4 |
| Danshen | MOL007154 | tanshinone iia | Neuronal acetylcholine receptor subunit alpha-7 | CHRNA7 |
| Danshen | MOL007154 | tanshinone iia | Nuclear receptor coactivator 1 | NCOA1 |
| Danshen | MOL007154 | tanshinone iia | Retinoic acid receptor RXR-alpha | RXRA |
| Danshen | MOL007154 | tanshinone iia | Transcription factor p65 | RELA |
| Danshen | MOL007154 | tanshinone iia | Apoptosis regulator Bcl-2 | BCL2 |
| Danshen | MOL007154 | tanshinone iia | Proto-oncogene c-Fos | FOS |
| Danshen | MOL007154 | tanshinone iia | Cyclin-dependent kinase inhibitor 1 | CDKN1A |
| Danshen | MOL007154 | tanshinone iia | Matrix metalloproteinase-9 | MMP9 |
| Danshen | MOL007154 | tanshinone iia | Transcription factor AP-1 | JUN |
| Danshen | MOL007154 | tanshinone iia | Activator of 90 kDa heat shock protein ATPase homolog 1 | AHSA1 |
| Danshen | MOL007154 | tanshinone iia | Caspase-3 | CASP3 |
| Danshen | MOL007154 | tanshinone iia | Cellular tumor antigen p53 | TP53 |
| Danshen | MOL007154 | tanshinone iia | NF-kappa-B inhibitor alpha | NFKBIA |
| Danshen | MOL007154 | tanshinone iia | Fatty acid synthase | FASN |
| Danshen | MOL007154 | tanshinone iia | Endothelin-1 receptor | EDNRA |
| Danshen | MOL007154 | tanshinone iia | Endothelin-1 | EDN1 |
| Danshen | MOL007154 | tanshinone iia | Cytochrome P450 3A4 | CYP3A4 |
| Danshen | MOL007154 | tanshinone iia | Myc proto-oncogene protein | MYC |
| Danshen | MOL007154 | tanshinone iia | Cytochrome P450 1A1 | CYP1A1 |
| Danshen | MOL007154 | tanshinone iia | Nuclear receptor subfamily 1 group I member 2 | NR1I2 |
| Danshen | MOL007154 | tanshinone iia | Nucleophosmin | NPM1 |
| Danshen | MOL007154 | tanshinone iia | Endothelin-converting enzyme 1 | ECE1 |
| Danshen | MOL007154 | tanshinone iia | Calcitonin receptor | CALCR |
| Danshen | MOL007154 | tanshinone iia | Integrin beta-3 | ITGB3 |
| Danshen | MOL007155 | (6S)-6-(hydroxymethyl)-1,6-dimethyl-8,9-dihydro-7H-naphtho[8,7-g]benzofuran-10,11-dione | Prothrombin | F2 |
| Danshen | MOL007155 | (6S)-6-(hydroxymethyl)-1,6-dimethyl-8,9-dihydro-7H-naphtho[8,7-g]benzofuran-10,11-dione | Muscarinic acetylcholine receptor M1 | CHRM1 |
| Danshen | MOL007155 | (6S)-6-(hydroxymethyl)-1,6-dimethyl-8,9-dihydro-7H-naphtho[8,7-g]benzofuran-10,11-dione | Sodium channel protein type 5 subunit alpha | SCN5A |
| Danshen | MOL007155 | (6S)-6-(hydroxymethyl)-1,6-dimethyl-8,9-dihydro-7H-naphtho[8,7-g]benzofuran-10,11-dione | Prostaglandin G/H synthase 2 | PTGS2 |
| Danshen | MOL007155 | (6S)-6-(hydroxymethyl)-1,6-dimethyl-8,9-dihydro-7H-naphtho[8,7-g]benzofuran-10,11-dione | Delta-type opioid receptor | OPRD1 |
| Danshen | MOL007155 | (6S)-6-(hydroxymethyl)-1,6-dimethyl-8,9-dihydro-7H-naphtho[8,7-g]benzofuran-10,11-dione | Acetylcholinesterase | ACHE |
| Danshen | MOL007155 | (6S)-6-(hydroxymethyl)-1,6-dimethyl-8,9-dihydro-7H-naphtho[8,7-g]benzofuran-10,11-dione | Alpha-1A adrenergic receptor | ADRA1A |
| Danshen | MOL007155 | (6S)-6-(hydroxymethyl)-1,6-dimethyl-8,9-dihydro-7H-naphtho[8,7-g]benzofuran-10,11-dione | Beta-2 adrenergic receptor | ADRB2 |
| Danshen | MOL007155 | (6S)-6-(hydroxymethyl)-1,6-dimethyl-8,9-dihydro-7H-naphtho[8,7-g]benzofuran-10,11-dione | Mu-type opioid receptor | OPRM1 |
| Danshen | MOL007155 | (6S)-6-(hydroxymethyl)-1,6-dimethyl-8,9-dihydro-7H-naphtho[8,7-g]benzofuran-10,11-dione | Dipeptidyl peptidase 4 | DPP4 |
| Danshen | MOL007155 | (6S)-6-(hydroxymethyl)-1,6-dimethyl-8,9-dihydro-7H-naphtho[8,7-g]benzofuran-10,11-dione | Neuronal acetylcholine receptor subunit alpha-7 | CHRNA7 |
| Danshen | MOL007155 | (6S)-6-(hydroxymethyl)-1,6-dimethyl-8,9-dihydro-7H-naphtho[8,7-g]benzofuran-10,11-dione | Trypsin-1 | PRSS1 |
| Danshen | MOL007155 | (6S)-6-(hydroxymethyl)-1,6-dimethyl-8,9-dihydro-7H-naphtho[8,7-g]benzofuran-10,11-dione | Nuclear receptor coactivator 1 | NCOA1 |
| Danshen | MOL007156 | tanshinone Ⅵ | Prostaglandin G/H synthase 1 | PTGS1 |
| Danshen | MOL007156 | tanshinone Ⅵ | Estrogen receptor | ESR1 |
| Danshen | MOL007156 | tanshinone Ⅵ | Androgen receptor | AR |
| Danshen | MOL007156 | tanshinone Ⅵ | Sodium channel protein type 5 subunit alpha | SCN5A |
| Danshen | MOL007156 | tanshinone Ⅵ | Peroxisome proliferator-activated receptor gamma | PPARG |
| Danshen | MOL007156 | tanshinone Ⅵ | Coagulation factor X | F10 |
| Danshen | MOL007156 | tanshinone Ⅵ | Prostaglandin G/H synthase 2 | PTGS2 |
| Danshen | MOL007156 | tanshinone Ⅵ | Heat shock protein HSP 90-alpha | HSP90AA1 |
| Danshen | MOL007156 | tanshinone Ⅵ | Nuclear receptor coactivator 2 | NCOA2 |
| Danshen | MOL007156 | tanshinone Ⅵ | Nuclear receptor coactivator 1 | NCOA1 |
| Dihuang | MOL000359 | sitosterol | Progesterone receptor | PGR |
| Dihuang | MOL000359 | sitosterol | Nuclear receptor coactivator 2 | NCOA2 |
| Dihuang | MOL000359 | sitosterol | Mineralocorticoid receptor | NR3C2 |
| Dihuang | MOL000449 | Stigmasterol | Progesterone receptor | PGR |
| Dihuang | MOL000449 | Stigmasterol | Mineralocorticoid receptor | NR3C2 |
| Dihuang | MOL000449 | Stigmasterol | Nuclear receptor coactivator 2 | NCOA2 |
| Dihuang | MOL000449 | Stigmasterol | Retinoic acid receptor RXR-alpha | RXRA |
| Dihuang | MOL000449 | Stigmasterol | Nuclear receptor coactivator 1 | NCOA1 |
| Dihuang | MOL000449 | Stigmasterol | Prostaglandin G/H synthase 1 | PTGS1 |
| Dihuang | MOL000449 | Stigmasterol | Prostaglandin G/H synthase 2 | PTGS2 |
| Dihuang | MOL000449 | Stigmasterol | Alpha-2A adrenergic receptor | ADRA2A |
| Dihuang | MOL000449 | Stigmasterol | Sodium-dependent noradrenaline transporter | SLC6A2 |
| Dihuang | MOL000449 | Stigmasterol | Sodium-dependent dopamine transporter | SLC6A3 |
| Dihuang | MOL000449 | Stigmasterol | Beta-2 adrenergic receptor | ADRB2 |
| Dihuang | MOL000449 | Stigmasterol | Urokinase-type plasminogen activator | PLAU |
| Dihuang | MOL000449 | Stigmasterol | Leukotriene A-4 hydrolase | LTA4H |
| Dihuang | MOL000449 | Stigmasterol | Amine oxidase [flavin-containing] B | MAOB |
| Dihuang | MOL000449 | Stigmasterol | Amine oxidase [flavin-containing] A | MAOA |
| Dihuang | MOL000449 | Stigmasterol | cAMP-dependent protein kinase catalytic subunit alpha | PRKACA |
| Dihuang | MOL000449 | Stigmasterol | Chymotrypsinogen B | CTRB1 |
| Dihuang | MOL000449 | Stigmasterol | Muscarinic acetylcholine receptor M3 | CHRM3 |
| Dihuang | MOL000449 | Stigmasterol | Muscarinic acetylcholine receptor M1 | CHRM1 |
| Dihuang | MOL000449 | Stigmasterol | Beta-1 adrenergic receptor | ADRB1 |
| Dihuang | MOL000449 | Stigmasterol | Sodium channel protein type 5 subunit alpha | SCN5A |
| Dihuang | MOL000449 | Stigmasterol | Alpha-1A adrenergic receptor | ADRA1A |
| Dihuang | MOL000449 | Stigmasterol | Muscarinic acetylcholine receptor M2 | CHRM2 |
| Dihuang | MOL000449 | Stigmasterol | Alpha-1B adrenergic receptor | ADRA1B |
| Dihuang | MOL000449 | Stigmasterol | Neuronal acetylcholine receptor subunit alpha-7 | CHRNA7 |
| Duzhong | MOL002058 | 40957-99-1 | Potassium voltage-gated channel subfamily H member 2 | KCNH2 |
| Duzhong | MOL002058 | 40957-99-1 | Sodium channel protein type 5 subunit alpha | SCN5A |
| Duzhong | MOL002058 | 40957-99-1 | Coagulation factor X | F10 |
| Duzhong | MOL002058 | 40957-99-1 | Prostaglandin G/H synthase 2 | PTGS2 |
| Duzhong | MOL002058 | 40957-99-1 | DNA topoisomerase 2-alpha | TOP2A |
| Duzhong | MOL002058 | 40957-99-1 | Prostaglandin G/H synthase 1 | PTGS1 |
| Duzhong | MOL002058 | 40957-99-1 | Heat shock protein HSP 90-alpha | HSP90AA1 |
| Duzhong | MOL002058 | 40957-99-1 | Nuclear receptor coactivator 2 | NCOA2 |
| Duzhong | MOL002058 | 40957-99-1 | Coagulation factor VII | F7 |
| Duzhong | MOL000211 | Mairin | Progesterone receptor | PGR |
| Duzhong | MOL000358 | beta-sitosterol | Progesterone receptor | PGR |
| Duzhong | MOL000358 | beta-sitosterol | Nuclear receptor coactivator 2 | NCOA2 |
| Duzhong | MOL000358 | beta-sitosterol | Prostaglandin G/H synthase 1 | PTGS1 |
| Duzhong | MOL000358 | beta-sitosterol | Prostaglandin G/H synthase 2 | PTGS2 |
| Duzhong | MOL000358 | beta-sitosterol | Heat shock protein HSP 90-alpha | HSP90AA1 |
| Duzhong | MOL000358 | beta-sitosterol | Potassium voltage-gated channel subfamily H member 2 | KCNH2 |
| Duzhong | MOL000358 | beta-sitosterol | cAMP-dependent protein kinase catalytic subunit alpha | PRKACA |
| Duzhong | MOL000358 | beta-sitosterol | D(1A) dopamine receptor | DRD1 |
| Duzhong | MOL000358 | beta-sitosterol | Muscarinic acetylcholine receptor M3 | CHRM3 |
| Duzhong | MOL000358 | beta-sitosterol | Muscarinic acetylcholine receptor M1 | CHRM1 |
| Duzhong | MOL000358 | beta-sitosterol | Sodium channel protein type 5 subunit alpha | SCN5A |
| Duzhong | MOL000358 | beta-sitosterol | Muscarinic acetylcholine receptor M4 | CHRM4 |
| Duzhong | MOL000358 | beta-sitosterol | cGMP-inhibited 3',5'-cyclic phosphodiesterase A | PDE3A |
| Duzhong | MOL000358 | beta-sitosterol | Alpha-1A adrenergic receptor | ADRA1A |
| Duzhong | MOL000358 | beta-sitosterol | Muscarinic acetylcholine receptor M2 | CHRM2 |
| Duzhong | MOL000358 | beta-sitosterol | Alpha-1B adrenergic receptor | ADRA1B |
| Duzhong | MOL000358 | beta-sitosterol | Beta-2 adrenergic receptor | ADRB2 |
| Duzhong | MOL000358 | beta-sitosterol | Neuronal acetylcholine receptor subunit alpha-2 | CHRNA2 |
| Duzhong | MOL000358 | beta-sitosterol | Sodium-dependent serotonin transporter | SLC6A4 |
| Duzhong | MOL000358 | beta-sitosterol | Mu-type opioid receptor | OPRM1 |
| Duzhong | MOL000358 | beta-sitosterol | Neuronal acetylcholine receptor subunit alpha-7 | CHRNA7 |
| Duzhong | MOL000358 | beta-sitosterol | Apoptosis regulator Bcl-2 | BCL2 |
| Duzhong | MOL000358 | beta-sitosterol | Apoptosis regulator BAX | BAX |
| Duzhong | MOL000358 | beta-sitosterol | Caspase-9 | CASP9 |
| Duzhong | MOL000358 | beta-sitosterol | Transcription factor AP-1 | JUN |
| Duzhong | MOL000358 | beta-sitosterol | Caspase-3 | CASP3 |
| Duzhong | MOL000358 | beta-sitosterol | Caspase-8 | CASP8 |
| Duzhong | MOL000358 | beta-sitosterol | Protein kinase C alpha type | PRKCA |
| Duzhong | MOL000358 | beta-sitosterol | Serum paraoxonase/arylesterase 1 | PON1 |
| Duzhong | MOL000358 | beta-sitosterol | Microtubule-associated protein 2 | MAP2 |
| Duzhong | MOL000422 | kaempferol | Nitric oxide synthase, inducible | NOS2 |
| Duzhong | MOL000422 | kaempferol | Prostaglandin G/H synthase 1 | PTGS1 |
| Duzhong | MOL000422 | kaempferol | Androgen receptor | AR |
| Duzhong | MOL000422 | kaempferol | Peroxisome proliferator-activated receptor gamma | PPARG |
| Duzhong | MOL000422 | kaempferol | Prostaglandin G/H synthase 2 | PTGS2 |
| Duzhong | MOL000422 | kaempferol | Heat shock protein HSP 90-alpha | HSP90AA1 |
| Duzhong | MOL000422 | kaempferol | cAMP-dependent protein kinase catalytic subunit alpha | PRKACA |
| Duzhong | MOL000422 | kaempferol | Nuclear receptor coactivator 2 | NCOA2 |
| Duzhong | MOL000422 | kaempferol | Dipeptidyl peptidase 4 | DPP4 |
| Duzhong | MOL000422 | kaempferol | Trypsin-1 | PRSS1 |
| Duzhong | MOL000422 | kaempferol | Progesterone receptor | PGR |
| Duzhong | MOL000422 | kaempferol | Prothrombin | F2 |
| Duzhong | MOL000422 | kaempferol | Muscarinic acetylcholine receptor M1 | CHRM1 |
| Duzhong | MOL000422 | kaempferol | Acetylcholinesterase | ACHE |
| Duzhong | MOL000422 | kaempferol | Sodium-dependent noradrenaline transporter | SLC6A2 |
| Duzhong | MOL000422 | kaempferol | Muscarinic acetylcholine receptor M2 | CHRM2 |
| Duzhong | MOL000422 | kaempferol | Alpha-1B adrenergic receptor | ADRA1B |
| Duzhong | MOL000422 | kaempferol | DNA topoisomerase 2-alpha | TOP2A |
| Duzhong | MOL000422 | kaempferol | Coagulation factor VII | F7 |
| Duzhong | MOL000422 | kaempferol | Transcription factor p65 | RELA |
| Duzhong | MOL000422 | kaempferol | Inhibitor of nuclear factor kappa-B kinase subunit beta | IKBKB |
| Duzhong | MOL000422 | kaempferol | RAC-alpha serine/threonine-protein kinase | AKT1 |
| Duzhong | MOL000422 | kaempferol | Apoptosis regulator Bcl-2 | BCL2 |
| Duzhong | MOL000422 | kaempferol | Apoptosis regulator BAX | BAX |
| Duzhong | MOL000422 | kaempferol | Tumor necrosis factor | TNF |
| Duzhong | MOL000422 | kaempferol | Transcription factor AP-1 | JUN |
| Duzhong | MOL000422 | kaempferol | Activator of 90 kDa heat shock protein ATPase homolog 1 | AHSA1 |
| Duzhong | MOL000422 | kaempferol | Caspase-3 | CASP3 |
| Duzhong | MOL000422 | kaempferol | Mitogen-activated protein kinase 8 | MAPK8 |
| Duzhong | MOL000422 | kaempferol | Interstitial collagenase | MMP1 |
| Duzhong | MOL000422 | kaempferol | Signal transducer and activator of transcription 1-alpha/beta | STAT1 |
| Duzhong | MOL000422 | kaempferol | Peroxisome proliferator-activated receptor gamma | PPARG |
| Duzhong | MOL000422 | kaempferol | Heme oxygenase 1 | HMOX1 |
| Duzhong | MOL000422 | kaempferol | Cytochrome P450 3A4 | CYP3A4 |
| Duzhong | MOL000422 | kaempferol | Cytochrome P450 1A1 | CYP1A1 |
| Duzhong | MOL000422 | kaempferol | Intercellular adhesion molecule 1 | ICAM1 |
| Duzhong | MOL000422 | kaempferol | E-selectin | SELE |
| Duzhong | MOL000422 | kaempferol | Vascular cell adhesion protein 1 | VCAM1 |
| Duzhong | MOL000422 | kaempferol | Nuclear receptor subfamily 1 group I member 2 | NR1I2 |
| Duzhong | MOL000422 | kaempferol | Cytochrome P450 1B1 | CYP1B1 |
| Duzhong | MOL000422 | kaempferol | Arachidonate 5-lipoxygenase | ALOX5 |
| Duzhong | MOL000422 | kaempferol | Hyaluronan synthase 2 | HAS2 |
| Duzhong | MOL000422 | kaempferol | Aryl hydrocarbon receptor | AHR |
| Duzhong | MOL000422 | kaempferol | 26S proteasome non-ATPase regulatory subunit 3 | PSMD3 |
| Duzhong | MOL000422 | kaempferol | Solute carrier family 2, facilitated glucose transporter member 4 | SLC2A4 |
| Duzhong | MOL000422 | kaempferol | Nuclear receptor subfamily 1 group I member 3 | NR1I3 |
| Duzhong | MOL000422 | kaempferol | Insulin receptor | INSR |
| Duzhong | MOL000422 | kaempferol | Type I iodothyronine deiodinase | DIO1 |
| Duzhong | MOL000422 | kaempferol | Serine/threonine-protein phosphatase 2B catalytic subunit alpha isoform | PPP3CA |
| Duzhong | MOL000422 | kaempferol | Glutathione S-transferase Mu 1 | GSTM1 |
| Duzhong | MOL000422 | kaempferol | Glutathione S-transferase Mu 2 | GSTM2 |
| Duzhong | MOL000422 | kaempferol | Aldo-keto reductase family 1 member C3 | AKR1C3 |
| Duzhong | MOL000422 | kaempferol | Antileukoproteinase | SLPI |
| Duzhong | MOL004367 | olivil | Prostaglandin G/H synthase 2 | PTGS2 |
| Duzhong | MOL004367 | olivil | Heat shock protein HSP 90-alpha | HSP90AA1 |
| Duzhong | MOL004367 | olivil | Nuclear receptor coactivator 2 | NCOA2 |
| Duzhong | MOL000443 | Erythraline | Prostaglandin G/H synthase 1 | PTGS1 |
| Duzhong | MOL000443 | Erythraline | Muscarinic acetylcholine receptor M3 | CHRM3 |
| Duzhong | MOL000443 | Erythraline | Muscarinic acetylcholine receptor M1 | CHRM1 |
| Duzhong | MOL000443 | Erythraline | Sodium channel protein type 5 subunit alpha | SCN5A |
| Duzhong | MOL000443 | Erythraline | Muscarinic acetylcholine receptor M5 | CHRM5 |
| Duzhong | MOL000443 | Erythraline | Prostaglandin G/H synthase 2 | PTGS2 |
| Duzhong | MOL000443 | Erythraline | Muscarinic acetylcholine receptor M4 | CHRM4 |
| Duzhong | MOL000443 | Erythraline | Retinoic acid receptor RXR-alpha | RXRA |
| Duzhong | MOL000443 | Erythraline | Delta-type opioid receptor | OPRD1 |
| Duzhong | MOL000443 | Erythraline | Muscarinic acetylcholine receptor M2 | CHRM2 |
| Duzhong | MOL000443 | Erythraline | Alpha-2B adrenergic receptor | ADRA2B |
| Duzhong | MOL000443 | Erythraline | Alpha-1B adrenergic receptor | ADRA1B |
| Duzhong | MOL000443 | Erythraline | Beta-2 adrenergic receptor | ADRB2 |
| Duzhong | MOL000443 | Erythraline | Alpha-1D adrenergic receptor | ADRA1D |
| Duzhong | MOL000443 | Erythraline | Neuronal acetylcholine receptor subunit alpha-2 | CHRNA2 |
| Duzhong | MOL000443 | Erythraline | Mu-type opioid receptor | OPRM1 |
| Duzhong | MOL000443 | Erythraline | Neuronal acetylcholine receptor subunit alpha-7 | CHRNA7 |
| Duzhong | MOL000443 | Erythraline | D(1A) dopamine receptor | DRD1 |
| Duzhong | MOL005922 | Acanthoside B | DNA topoisomerase 2-alpha | TOP2A |
| Duzhong | MOL006709 | AIDS214634 | Prostaglandin G/H synthase 2 | PTGS2 |
| Duzhong | MOL006709 | AIDS214634 | Nuclear receptor coactivator 2 | NCOA2 |
| Duzhong | MOL006709 | AIDS214634 | Potassium voltage-gated channel subfamily H member 2 | KCNH2 |
| Duzhong | MOL006709 | AIDS214634 | Coagulation factor X | F10 |
| Duzhong | MOL006709 | AIDS214634 | Coagulation factor VII | F7 |
| Duzhong | MOL007059 | 3-beta-Hydroxymethyllenetanshiquinone | D(1A) dopamine receptor | DRD1 |
| Duzhong | MOL007059 | 3-beta-Hydroxymethyllenetanshiquinone | Prothrombin | F2 |
| Duzhong | MOL007059 | 3-beta-Hydroxymethyllenetanshiquinone | Muscarinic acetylcholine receptor M1 | CHRM1 |
| Duzhong | MOL007059 | 3-beta-Hydroxymethyllenetanshiquinone | Prostaglandin G/H synthase 2 | PTGS2 |
| Duzhong | MOL007059 | 3-beta-Hydroxymethyllenetanshiquinone | Carbonic anhydrase 2 | CA2 |
| Duzhong | MOL007059 | 3-beta-Hydroxymethyllenetanshiquinone | Retinoic acid receptor RXR-alpha | RXRA |
| Duzhong | MOL007059 | 3-beta-Hydroxymethyllenetanshiquinone | Delta-type opioid receptor | OPRD1 |
| Duzhong | MOL007059 | 3-beta-Hydroxymethyllenetanshiquinone | Acetylcholinesterase | ACHE |
| Duzhong | MOL007059 | 3-beta-Hydroxymethyllenetanshiquinone | Alpha-1A adrenergic receptor | ADRA1A |
| Duzhong | MOL007059 | 3-beta-Hydroxymethyllenetanshiquinone | Beta-2 adrenergic receptor | ADRB2 |
| Duzhong | MOL007059 | 3-beta-Hydroxymethyllenetanshiquinone | Mu-type opioid receptor | OPRM1 |
| Duzhong | MOL007059 | 3-beta-Hydroxymethyllenetanshiquinone | Dipeptidyl peptidase 4 | DPP4 |
| Duzhong | MOL007059 | 3-beta-Hydroxymethyllenetanshiquinone | Heat shock protein HSP 90-alpha | HSP90AA1 |
| Duzhong | MOL007059 | 3-beta-Hydroxymethyllenetanshiquinone | Neuronal acetylcholine receptor subunit alpha-7 | CHRNA7 |
| Duzhong | MOL007059 | 3-beta-Hydroxymethyllenetanshiquinone | Trypsin-1 | PRSS1 |
| Duzhong | MOL007059 | 3-beta-Hydroxymethyllenetanshiquinone | Nuclear receptor coactivator 1 | NCOA1 |
| Duzhong | MOL000073 | ent-Epicatechin | Prostaglandin G/H synthase 1 | PTGS1 |
| Duzhong | MOL000073 | ent-Epicatechin | Estrogen receptor | ESR1 |
| Duzhong | MOL000073 | ent-Epicatechin | Prostaglandin G/H synthase 2 | PTGS2 |
| Duzhong | MOL000073 | ent-Epicatechin | Heat shock protein HSP 90-alpha | HSP90AA1 |
| Duzhong | MOL000073 | ent-Epicatechin | cAMP-dependent protein kinase catalytic subunit alpha | PRKACA |
| Duzhong | MOL007563 | Yangambin | Potassium voltage-gated channel subfamily H member 2 | KCNH2 |
| Duzhong | MOL007563 | Yangambin | Sodium channel protein type 5 subunit alpha | SCN5A |
| Duzhong | MOL007563 | Yangambin | Coagulation factor X | F10 |
| Duzhong | MOL007563 | Yangambin | Prostaglandin G/H synthase 2 | PTGS2 |
| Duzhong | MOL007563 | Yangambin | DNA topoisomerase 2-alpha | TOP2A |
| Duzhong | MOL007563 | Yangambin | Voltage-dependent L-type calcium channel subunit alpha-1S | CACNA1S |
| Duzhong | MOL007563 | Yangambin | Nuclear receptor coactivator 2 | NCOA2 |
| Duzhong | MOL009007 | Eucommin A | DNA topoisomerase 2-alpha | TOP2A |
| Duzhong | MOL009009 | (+)-medioresinol | Potassium voltage-gated channel subfamily H member 2 | KCNH2 |
| Duzhong | MOL009009 | (+)-medioresinol | Sodium channel protein type 5 subunit alpha | SCN5A |
| Duzhong | MOL009009 | (+)-medioresinol | Coagulation factor X | F10 |
| Duzhong | MOL009009 | (+)-medioresinol | Prostaglandin G/H synthase 2 | PTGS2 |
| Duzhong | MOL009009 | (+)-medioresinol | Coagulation factor VII | F7 |
| Duzhong | MOL009009 | (+)-medioresinol | Alpha-1B adrenergic receptor | ADRA1B |
| Duzhong | MOL009009 | (+)-medioresinol | DNA topoisomerase 2-alpha | TOP2A |
| Duzhong | MOL009009 | (+)-medioresinol | Heat shock protein HSP 90-alpha | HSP90AA1 |
| Duzhong | MOL009009 | (+)-medioresinol | Nuclear receptor coactivator 2 | NCOA2 |
| Duzhong | MOL009015 | (-)-Tabernemontanine | Prostaglandin G/H synthase 1 | PTGS1 |
| Duzhong | MOL009015 | (-)-Tabernemontanine | D(1A) dopamine receptor | DRD1 |
| Duzhong | MOL009015 | (-)-Tabernemontanine | Muscarinic acetylcholine receptor M3 | CHRM3 |
| Duzhong | MOL009015 | (-)-Tabernemontanine | Potassium voltage-gated channel subfamily H member 2 | KCNH2 |
| Duzhong | MOL009015 | (-)-Tabernemontanine | Muscarinic acetylcholine receptor M1 | CHRM1 |
| Duzhong | MOL009015 | (-)-Tabernemontanine | Androgen receptor | AR |
| Duzhong | MOL009015 | (-)-Tabernemontanine | D(1B) dopamine receptor | DRD5 |
| Duzhong | MOL009015 | (-)-Tabernemontanine | Sodium channel protein type 5 subunit alpha | SCN5A |
| Duzhong | MOL009015 | (-)-Tabernemontanine | Coagulation factor X | F10 |
| Duzhong | MOL009015 | (-)-Tabernemontanine | Muscarinic acetylcholine receptor M5 | CHRM5 |
| Duzhong | MOL009015 | (-)-Tabernemontanine | Prostaglandin G/H synthase 2 | PTGS2 |
| Duzhong | MOL009015 | (-)-Tabernemontanine | Alpha-2A adrenergic receptor | ADRA2A |
| Duzhong | MOL009015 | (-)-Tabernemontanine | Muscarinic acetylcholine receptor M4 | CHRM4 |
| Duzhong | MOL009015 | (-)-Tabernemontanine | Delta-type opioid receptor | OPRD1 |
| Duzhong | MOL009015 | (-)-Tabernemontanine | Acetylcholinesterase | ACHE |
| Duzhong | MOL009015 | (-)-Tabernemontanine | cGMP-inhibited 3',5'-cyclic phosphodiesterase A | PDE3A |
| Duzhong | MOL009015 | (-)-Tabernemontanine | Sodium-dependent noradrenaline transporter | SLC6A2 |
| Duzhong | MOL009015 | (-)-Tabernemontanine | Alpha-1A adrenergic receptor | ADRA1A |
| Duzhong | MOL009015 | (-)-Tabernemontanine | Muscarinic acetylcholine receptor M2 | CHRM2 |
| Duzhong | MOL009015 | (-)-Tabernemontanine | Alpha-2B adrenergic receptor | ADRA2B |
| Duzhong | MOL009015 | (-)-Tabernemontanine | Alpha-1B adrenergic receptor | ADRA1B |
| Duzhong | MOL009015 | (-)-Tabernemontanine | D(3) dopamine receptor | DRD3 |
| Duzhong | MOL009015 | (-)-Tabernemontanine | Beta-2 adrenergic receptor | ADRB2 |
| Duzhong | MOL009015 | (-)-Tabernemontanine | Alpha-1D adrenergic receptor | ADRA1D |
| Duzhong | MOL009015 | (-)-Tabernemontanine | Neuronal acetylcholine receptor subunit alpha-2 | CHRNA2 |
| Duzhong | MOL009015 | (-)-Tabernemontanine | Sodium-dependent serotonin transporter | SLC6A4 |
| Duzhong | MOL009015 | (-)-Tabernemontanine | D(2) dopamine receptor | DRD2 |
| Duzhong | MOL009015 | (-)-Tabernemontanine | Mu-type opioid receptor | OPRM1 |
| Duzhong | MOL009015 | (-)-Tabernemontanine | Heat shock protein HSP 90-alpha | HSP90AA1 |
| Duzhong | MOL009015 | (-)-Tabernemontanine | Neuronal acetylcholine receptor subunit alpha-7 | CHRNA7 |
| Duzhong | MOL009015 | (-)-Tabernemontanine | cAMP and cAMP-inhibited cGMP 3',5'-cyclic phosphodiesterase 10A | PDE10A |
| Duzhong | MOL009027 | Cyclopamine | Androgen receptor | AR |
| Duzhong | MOL009027 | Cyclopamine | Mineralocorticoid receptor | NR3C2 |
| Duzhong | MOL009027 | Cyclopamine | Glucocorticoid receptor | NR3C1 |
| Duzhong | MOL009029 | Dehydrodiconiferyl alcohol 4,gamma'-di-O-beta-D-glucopyanoside_qt | Prostaglandin G/H synthase 1 | PTGS1 |
| Duzhong | MOL009029 | Dehydrodiconiferyl alcohol 4,gamma'-di-O-beta-D-glucopyanoside_qt | Prothrombin | F2 |
| Duzhong | MOL009029 | Dehydrodiconiferyl alcohol 4,gamma'-di-O-beta-D-glucopyanoside_qt | Potassium voltage-gated channel subfamily H member 2 | KCNH2 |
| Duzhong | MOL009029 | Dehydrodiconiferyl alcohol 4,gamma'-di-O-beta-D-glucopyanoside_qt | Estrogen receptor | ESR1 |
| Duzhong | MOL009029 | Dehydrodiconiferyl alcohol 4,gamma'-di-O-beta-D-glucopyanoside_qt | Prostaglandin G/H synthase 2 | PTGS2 |
| Duzhong | MOL009029 | Dehydrodiconiferyl alcohol 4,gamma'-di-O-beta-D-glucopyanoside_qt | Coagulation factor VII | F7 |
| Duzhong | MOL009029 | Dehydrodiconiferyl alcohol 4,gamma'-di-O-beta-D-glucopyanoside_qt | Acetylcholinesterase | ACHE |
| Duzhong | MOL009029 | Dehydrodiconiferyl alcohol 4,gamma'-di-O-beta-D-glucopyanoside_qt | Dipeptidyl peptidase 4 | DPP4 |
| Duzhong | MOL009029 | Dehydrodiconiferyl alcohol 4,gamma'-di-O-beta-D-glucopyanoside_qt | Heat shock protein HSP 90-alpha | HSP90AA1 |
| Duzhong | MOL009029 | Dehydrodiconiferyl alcohol 4,gamma'-di-O-beta-D-glucopyanoside_qt | Trypsin-1 | PRSS1 |
| Duzhong | MOL009029 | Dehydrodiconiferyl alcohol 4,gamma'-di-O-beta-D-glucopyanoside_qt | Cyclin-A2 | CCNA2 |
| Duzhong | MOL009031 | Cinchonan-9-al, 6'-methoxy-, (9R)- | Prostaglandin G/H synthase 1 | PTGS1 |
| Duzhong | MOL009031 | Cinchonan-9-al, 6'-methoxy-, (9R)- | D(1A) dopamine receptor | DRD1 |
| Duzhong | MOL009031 | Cinchonan-9-al, 6'-methoxy-, (9R)- | Muscarinic acetylcholine receptor M3 | CHRM3 |
| Duzhong | MOL009031 | Cinchonan-9-al, 6'-methoxy-, (9R)- | Potassium voltage-gated channel subfamily H member 2 | KCNH2 |
| Duzhong | MOL009031 | Cinchonan-9-al, 6'-methoxy-, (9R)- | Muscarinic acetylcholine receptor M1 | CHRM1 |
| Duzhong | MOL009031 | Cinchonan-9-al, 6'-methoxy-, (9R)- | Beta-1 adrenergic receptor | ADRB1 |
| Duzhong | MOL009031 | Cinchonan-9-al, 6'-methoxy-, (9R)- | Sodium channel protein type 5 subunit alpha | SCN5A |
| Duzhong | MOL009031 | Cinchonan-9-al, 6'-methoxy-, (9R)- | Coagulation factor X | F10 |
| Duzhong | MOL009031 | Cinchonan-9-al, 6'-methoxy-, (9R)- | Muscarinic acetylcholine receptor M5 | CHRM5 |
| Duzhong | MOL009031 | Cinchonan-9-al, 6'-methoxy-, (9R)- | Prostaglandin G/H synthase 2 | PTGS2 |
| Duzhong | MOL009031 | Cinchonan-9-al, 6'-methoxy-, (9R)- | Alpha-2A adrenergic receptor | ADRA2A |
| Duzhong | MOL009031 | Cinchonan-9-al, 6'-methoxy-, (9R)- | Alpha-2C adrenergic receptor | ADRA2C |
| Duzhong | MOL009031 | Cinchonan-9-al, 6'-methoxy-, (9R)- | D(4) dopamine receptor | DRD4 |
| Duzhong | MOL009031 | Cinchonan-9-al, 6'-methoxy-, (9R)- | Muscarinic acetylcholine receptor M4 | CHRM4 |
| Duzhong | MOL009031 | Cinchonan-9-al, 6'-methoxy-, (9R)- | Retinoic acid receptor RXR-alpha | RXRA |
| Duzhong | MOL009031 | Cinchonan-9-al, 6'-methoxy-, (9R)- | Delta-type opioid receptor | OPRD1 |
| Duzhong | MOL009031 | Cinchonan-9-al, 6'-methoxy-, (9R)- | cGMP-inhibited 3',5'-cyclic phosphodiesterase A | PDE3A |
| Duzhong | MOL009031 | Cinchonan-9-al, 6'-methoxy-, (9R)- | Sodium-dependent noradrenaline transporter | SLC6A2 |
| Duzhong | MOL009031 | Cinchonan-9-al, 6'-methoxy-, (9R)- | Alpha-1A adrenergic receptor | ADRA1A |
| Duzhong | MOL009031 | Cinchonan-9-al, 6'-methoxy-, (9R)- | Muscarinic acetylcholine receptor M2 | CHRM2 |
| Duzhong | MOL009031 | Cinchonan-9-al, 6'-methoxy-, (9R)- | Alpha-2B adrenergic receptor | ADRA2B |
| Duzhong | MOL009031 | Cinchonan-9-al, 6'-methoxy-, (9R)- | Alpha-1B adrenergic receptor | ADRA1B |
| Duzhong | MOL009031 | Cinchonan-9-al, 6'-methoxy-, (9R)- | D(3) dopamine receptor | DRD3 |
| Duzhong | MOL009031 | Cinchonan-9-al, 6'-methoxy-, (9R)- | Sodium-dependent dopamine transporter | SLC6A3 |
| Duzhong | MOL009031 | Cinchonan-9-al, 6'-methoxy-, (9R)- | Beta-2 adrenergic receptor | ADRB2 |
| Duzhong | MOL009031 | Cinchonan-9-al, 6'-methoxy-, (9R)- | Alpha-1D adrenergic receptor | ADRA1D |
| Duzhong | MOL009031 | Cinchonan-9-al, 6'-methoxy-, (9R)- | Sodium-dependent serotonin transporter | SLC6A4 |
| Duzhong | MOL009031 | Cinchonan-9-al, 6'-methoxy-, (9R)- | D(2) dopamine receptor | DRD2 |
| Duzhong | MOL009031 | Cinchonan-9-al, 6'-methoxy-, (9R)- | Epidermal growth factor receptor | EGFR |
| Duzhong | MOL009031 | Cinchonan-9-al, 6'-methoxy-, (9R)- | Mu-type opioid receptor | OPRM1 |
| Duzhong | MOL009031 | Cinchonan-9-al, 6'-methoxy-, (9R)- | Heat shock protein HSP 90-alpha | HSP90AA1 |
| Duzhong | MOL009031 | Cinchonan-9-al, 6'-methoxy-, (9R)- | Neuronal acetylcholine receptor subunit alpha-7 | CHRNA7 |
| Duzhong | MOL009031 | Cinchonan-9-al, 6'-methoxy-, (9R)- | cAMP-dependent protein kinase catalytic subunit alpha | PRKACA |
| Duzhong | MOL009047 | (+)-Eudesmin | Muscarinic acetylcholine receptor M3 | CHRM3 |
| Duzhong | MOL009047 | (+)-Eudesmin | Potassium voltage-gated channel subfamily H member 2 | KCNH2 |
| Duzhong | MOL009047 | (+)-Eudesmin | Sodium channel protein type 5 subunit alpha | SCN5A |
| Duzhong | MOL009047 | (+)-Eudesmin | Coagulation factor X | F10 |
| Duzhong | MOL009047 | (+)-Eudesmin | Prostaglandin G/H synthase 2 | PTGS2 |
| Duzhong | MOL009047 | (+)-Eudesmin | Alpha-1B adrenergic receptor | ADRA1B |
| Duzhong | MOL009047 | (+)-Eudesmin | Beta-2 adrenergic receptor | ADRB2 |
| Duzhong | MOL009047 | (+)-Eudesmin | Heat shock protein HSP 90-alpha | HSP90AA1 |
| Duzhong | MOL009047 | (+)-Eudesmin | Nuclear receptor coactivator 2 | NCOA2 |
| Duzhong | MOL009053 | 4-[(2S,3R)-5-[(E)-3-hydroxyprop-1-enyl]-7-methoxy-3-methylol-2,3-dihydrobenzofuran-2-yl]-2-methoxy-phenol | Prothrombin | F2 |
| Duzhong | MOL009053 | 4-[(2S,3R)-5-[(E)-3-hydroxyprop-1-enyl]-7-methoxy-3-methylol-2,3-dihydrobenzofuran-2-yl]-2-methoxy-phenol | Potassium voltage-gated channel subfamily H member 2 | KCNH2 |
| Duzhong | MOL009053 | 4-[(2S,3R)-5-[(E)-3-hydroxyprop-1-enyl]-7-methoxy-3-methylol-2,3-dihydrobenzofuran-2-yl]-2-methoxy-phenol | Estrogen receptor | ESR1 |
| Duzhong | MOL009053 | 4-[(2S,3R)-5-[(E)-3-hydroxyprop-1-enyl]-7-methoxy-3-methylol-2,3-dihydrobenzofuran-2-yl]-2-methoxy-phenol | Coagulation factor X | F10 |
| Duzhong | MOL009053 | 4-[(2S,3R)-5-[(E)-3-hydroxyprop-1-enyl]-7-methoxy-3-methylol-2,3-dihydrobenzofuran-2-yl]-2-methoxy-phenol | Prostaglandin G/H synthase 2 | PTGS2 |
| Duzhong | MOL009053 | 4-[(2S,3R)-5-[(E)-3-hydroxyprop-1-enyl]-7-methoxy-3-methylol-2,3-dihydrobenzofuran-2-yl]-2-methoxy-phenol | Dipeptidyl peptidase 4 | DPP4 |
| Duzhong | MOL009053 | 4-[(2S,3R)-5-[(E)-3-hydroxyprop-1-enyl]-7-methoxy-3-methylol-2,3-dihydrobenzofuran-2-yl]-2-methoxy-phenol | Heat shock protein HSP 90-alpha | HSP90AA1 |
| Duzhong | MOL009053 | 4-[(2S,3R)-5-[(E)-3-hydroxyprop-1-enyl]-7-methoxy-3-methylol-2,3-dihydrobenzofuran-2-yl]-2-methoxy-phenol | Trypsin-1 | PRSS1 |
| Duzhong | MOL009053 | 4-[(2S,3R)-5-[(E)-3-hydroxyprop-1-enyl]-7-methoxy-3-methylol-2,3-dihydrobenzofuran-2-yl]-2-methoxy-phenol | Acetylcholinesterase | ACHE |
| Duzhong | MOL009055 | hirsutin_qt | Nitric oxide synthase, inducible | NOS2 |
| Duzhong | MOL009055 | hirsutin_qt | Prostaglandin G/H synthase 1 | PTGS1 |
| Duzhong | MOL009055 | hirsutin_qt | Sodium channel protein type 5 subunit alpha | SCN5A |
| Duzhong | MOL009055 | hirsutin_qt | Coagulation factor X | F10 |
| Duzhong | MOL009055 | hirsutin_qt | Prostaglandin G/H synthase 2 | PTGS2 |
| Duzhong | MOL009055 | hirsutin_qt | Carbonic anhydrase 2 | CA2 |
| Duzhong | MOL009055 | hirsutin_qt | Coagulation factor VII | F7 |
| Duzhong | MOL009055 | hirsutin_qt | Vascular endothelial growth factor receptor 2 | KDR |
| Duzhong | MOL009055 | hirsutin_qt | Estrogen receptor beta | ESR2 |
| Duzhong | MOL009055 | hirsutin_qt | Mitogen-activated protein kinase 14 | MAPK14 |
| Duzhong | MOL009055 | hirsutin_qt | Glycogen synthase kinase-3 beta | GSK3B |
| Duzhong | MOL009055 | hirsutin_qt | Heat shock protein HSP 90-alpha | HSP90AA1 |
| Duzhong | MOL009055 | hirsutin_qt | Nuclear receptor coactivator 2 | NCOA2 |
| Duzhong | MOL009057 | liriodendrin_qt | Nuclear receptor coactivator 2 | NCOA2 |
| Duzhong | MOL000098 | quercetin | Prostaglandin G/H synthase 1 | PTGS1 |
| Duzhong | MOL000098 | quercetin | Androgen receptor | AR |
| Duzhong | MOL000098 | quercetin | Peroxisome proliferator-activated receptor gamma | PPARG |
| Duzhong | MOL000098 | quercetin | Prostaglandin G/H synthase 2 | PTGS2 |
| Duzhong | MOL000098 | quercetin | Heat shock protein HSP 90-alpha | HSP90AA1 |
| Duzhong | MOL000098 | quercetin | Nuclear receptor coactivator 2 | NCOA2 |
| Duzhong | MOL000098 | quercetin | Dipeptidyl peptidase 4 | DPP4 |
| Duzhong | MOL000098 | quercetin | Trypsin-1 | PRSS1 |
| Duzhong | MOL000098 | quercetin | DNA topoisomerase 2-alpha | TOP2A |
| Duzhong | MOL000098 | quercetin | Prothrombin | F2 |
| Duzhong | MOL000098 | quercetin | Potassium voltage-gated channel subfamily H member 2 | KCNH2 |
| Duzhong | MOL000098 | quercetin | Sodium channel protein type 5 subunit alpha | SCN5A |
| Duzhong | MOL000098 | quercetin | Coagulation factor X | F10 |
| Duzhong | MOL000098 | quercetin | Beta-2 adrenergic receptor | ADRB2 |
| Duzhong | MOL000098 | quercetin | Stromelysin-1 | MMP3 |
| Duzhong | MOL000098 | quercetin | cAMP-dependent protein kinase catalytic subunit alpha | PRKACA |
| Duzhong | MOL000098 | quercetin | Coagulation factor VII | F7 |
| Duzhong | MOL000098 | quercetin | Retinoic acid receptor RXR-alpha | RXRA |
| Duzhong | MOL000098 | quercetin | Acetylcholinesterase | ACHE |
| Duzhong | MOL000098 | quercetin | Amine oxidase [flavin-containing] B | MAOB |
| Duzhong | MOL000098 | quercetin | Transcription factor p65 | RELA |
| Duzhong | MOL000098 | quercetin | Epidermal growth factor receptor | EGFR |
| Duzhong | MOL000098 | quercetin | RAC-alpha serine/threonine-protein kinase | AKT1 |
| Duzhong | MOL000098 | quercetin | G1/S-specific cyclin-D1 | CCND1 |
| Duzhong | MOL000098 | quercetin | Apoptosis regulator Bcl-2 | BCL2 |
| Duzhong | MOL000098 | quercetin | Bcl-2-like protein 1 | BCL2L1 |
| Duzhong | MOL000098 | quercetin | Proto-oncogene c-Fos | FOS |
| Duzhong | MOL000098 | quercetin | Cyclin-dependent kinase inhibitor 1 | CDKN1A |
| Duzhong | MOL000098 | quercetin | Eukaryotic translation initiation factor 6 | EIF6 |
| Duzhong | MOL000098 | quercetin | Apoptosis regulator BAX | BAX |
| Duzhong | MOL000098 | quercetin | Caspase-9 | CASP9 |
| Duzhong | MOL000098 | quercetin | Urokinase-type plasminogen activator | PLAU |
| Duzhong | MOL000098 | quercetin | 72 kDa type IV collagenase | MMP2 |
| Duzhong | MOL000098 | quercetin | Matrix metalloproteinase-9 | MMP9 |
| Duzhong | MOL000098 | quercetin | Mitogen-activated protein kinase 1 | MAPK1 |
| Duzhong | MOL000098 | quercetin | Interleukin-10 | IL10 |
| Duzhong | MOL000098 | quercetin | Retinoblastoma-associated protein | RB1 |
| Duzhong | MOL000098 | quercetin | Tumor necrosis factor | TNF |
| Duzhong | MOL000098 | quercetin | Transcription factor AP-1 | JUN |
| Duzhong | MOL000098 | quercetin | Interleukin-6 | IL6 |
| Duzhong | MOL000098 | quercetin | Activator of 90 kDa heat shock protein ATPase homolog 1 | AHSA1 |
| Duzhong | MOL000098 | quercetin | Caspase-3 | CASP3 |
| Duzhong | MOL000098 | quercetin | Cellular tumor antigen p53 | TP53 |
| Duzhong | MOL000098 | quercetin | ETS domain-containing protein Elk-1 | ELK1 |
| Duzhong | MOL000098 | quercetin | NF-kappa-B inhibitor alpha | NFKBIA |
| Duzhong | MOL000098 | quercetin | Ornithine decarboxylase | ODC1 |
| Duzhong | MOL000098 | quercetin | Caspase-8 | CASP8 |
| Duzhong | MOL000098 | quercetin | DNA topoisomerase 1 | TOP1 |
| Duzhong | MOL000098 | quercetin | RAF proto-oncogene serine/threonine-protein kinase | RAF1 |
| Duzhong | MOL000098 | quercetin | Superoxide dismutase [Cu-Zn] | SOD1 |
| Duzhong | MOL000098 | quercetin | Protein kinase C alpha type | PRKCA |
| Duzhong | MOL000098 | quercetin | Interstitial collagenase | MMP1 |
| Duzhong | MOL000098 | quercetin | Hypoxia-inducible factor 1-alpha | HIF1A |
| Duzhong | MOL000098 | quercetin | Signal transducer and activator of transcription 1-alpha/beta | STAT1 |
| Duzhong | MOL000098 | quercetin | Protein CBFA2T1 | RUNX1T1 |
| Duzhong | MOL000098 | quercetin | Receptor tyrosine-protein kinase erbB-2 | ERBB2 |
| Duzhong | MOL000098 | quercetin | Peroxisome proliferator-activated receptor gamma | PPARG |
| Duzhong | MOL000098 | quercetin | Acetyl-CoA carboxylase 1 | ACACA |
| Duzhong | MOL000098 | quercetin | Heme oxygenase 1 | HMOX1 |
| Duzhong | MOL000098 | quercetin | Cytochrome P450 3A4 | CYP3A4 |
| Duzhong | MOL000098 | quercetin | Caveolin-1 | CAV1 |
| Duzhong | MOL000098 | quercetin | Myc proto-oncogene protein | MYC |
| Duzhong | MOL000098 | quercetin | Tissue factor | F3 |
| Duzhong | MOL000098 | quercetin | Gap junction alpha-1 protein | GJA1 |
| Duzhong | MOL000098 | quercetin | Cytochrome P450 1A1 | CYP1A1 |
| Duzhong | MOL000098 | quercetin | Intercellular adhesion molecule 1 | ICAM1 |
| Duzhong | MOL000098 | quercetin | Interleukin-1 beta | IL1B |
| Duzhong | MOL000098 | quercetin | E-selectin | SELE |
| Duzhong | MOL000098 | quercetin | Vascular cell adhesion protein 1 | VCAM1 |
| Duzhong | MOL000098 | quercetin | Interleukin-8 | CXCL8 |
| Duzhong | MOL000098 | quercetin | Protein kinase C beta type | PRKCB |
| Duzhong | MOL000098 | quercetin | Baculoviral IAP repeat-containing protein 5 | BIRC5 |
| Duzhong | MOL000098 | quercetin | Dual oxidase 2 | DUOX2 |
| Duzhong | MOL000098 | quercetin | Nitric oxide synthase, endothelial | NOS3 |
| Duzhong | MOL000098 | quercetin | Heat shock protein beta-1 | HSPB1 |
| Duzhong | MOL000098 | quercetin | Maltase-glucoamylase, intestinal | MGAM |
| Duzhong | MOL000098 | quercetin | Interleukin-2 | IL2 |
| Duzhong | MOL000098 | quercetin | Nuclear receptor subfamily 1 group I member 2 | NR1I2 |
| Duzhong | MOL000098 | quercetin | Cytochrome P450 1B1 | CYP1B1 |
| Duzhong | MOL000098 | quercetin | G2/mitotic-specific cyclin-B1 | CCNB1 |
| Duzhong | MOL000098 | quercetin | Tissue-type plasminogen activator | PLAT |
| Duzhong | MOL000098 | quercetin | Thrombomodulin | THBD |
| Duzhong | MOL000098 | quercetin | Plasminogen activator inhibitor 1 | SERPINE1 |
| Duzhong | MOL000098 | quercetin | Interferon gamma | IFNG |
| Duzhong | MOL000098 | quercetin | Arachidonate 5-lipoxygenase | ALOX5 |
| Duzhong | MOL000098 | quercetin | Interleukin-1 alpha | IL1A |
| Duzhong | MOL000098 | quercetin | Myeloperoxidase | MPO |
| Duzhong | MOL000098 | quercetin | DNA topoisomerase 2-alpha | TOP2A |
| Duzhong | MOL000098 | quercetin | Neutrophil cytosol factor 1 | NCF1 |
| Duzhong | MOL000098 | quercetin | Hyaluronan synthase 2 | HAS2 |
| Duzhong | MOL000098 | quercetin | Nuclear factor erythroid 2-related factor 2 | NFE2L2 |
| Duzhong | MOL000098 | quercetin | NAD(P)H dehydrogenase [quinone] 1 | NQO1 |
| Duzhong | MOL000098 | quercetin | Poly [ADP-ribose] polymerase 1 | PARP1 |
| Duzhong | MOL000098 | quercetin | Aryl hydrocarbon receptor | AHR |
| Duzhong | MOL000098 | quercetin | 26S proteasome non-ATPase regulatory subunit 3 | PSMD3 |
| Duzhong | MOL000098 | quercetin | Solute carrier family 2, facilitated glucose transporter member 4 | SLC2A4 |
| Duzhong | MOL000098 | quercetin | Collagen alpha-1(III) chain | COL3A1 |
| Duzhong | MOL000098 | quercetin | C-X-C motif chemokine 11 | CXCL11 |
| Duzhong | MOL000098 | quercetin | C-X-C motif chemokine 2 | CXCL2 |
| Duzhong | MOL000098 | quercetin | DDB1- and CUL4-associated factor 5 | DCAF5 |
| Duzhong | MOL000098 | quercetin | Nuclear receptor subfamily 1 group I member 3 | NR1I3 |
| Duzhong | MOL000098 | quercetin | Serine/threonine-protein kinase Chk2 | CHEK2 |
| Duzhong | MOL000098 | quercetin | Insulin receptor | INSR |
| Duzhong | MOL000098 | quercetin | Claudin-4 | CLDN4 |
| Duzhong | MOL000098 | quercetin | Peroxisome proliferator-activated receptor alpha | PPARA |
| Duzhong | MOL000098 | quercetin | Peroxisome proliferator-activated receptor delta | PPARD |
| Duzhong | MOL000098 | quercetin | Heat shock factor protein 1 | HSF1 |
| Duzhong | MOL000098 | quercetin | C-reactive protein | CRP |
| Duzhong | MOL000098 | quercetin | C-X-C motif chemokine 10 | CXCL10 |
| Duzhong | MOL000098 | quercetin | Inhibitor of nuclear factor kappa-B kinase subunit alpha | CHUK |
| Duzhong | MOL000098 | quercetin | Osteopontin | SPP1 |
| Duzhong | MOL000098 | quercetin | Runt-related transcription factor 2 | RUNX2 |
| Duzhong | MOL000098 | quercetin | Ras association domain-containing protein 1 | RASSF1 |
| Duzhong | MOL000098 | quercetin | Transcription factor E2F1 | E2F1 |
| Duzhong | MOL000098 | quercetin | Transcription factor E2F2 | E2F2 |
| Duzhong | MOL000098 | quercetin | Prostatic acid phosphatase | ACP3 |
| Duzhong | MOL000098 | quercetin | Cathepsin D | CTSD |
| Duzhong | MOL000098 | quercetin | Insulin-like growth factor-binding protein 3 | IGFBP3 |
| Duzhong | MOL000098 | quercetin | Insulin-like growth factor II | IGF2 |
| Duzhong | MOL000098 | quercetin | CD40 ligand | CD40LG |
| Duzhong | MOL000098 | quercetin | Interferon regulatory factor 1 | IRF1 |
| Duzhong | MOL000098 | quercetin | Receptor tyrosine-protein kinase erbB-3 | ERBB3 |
| Duzhong | MOL000098 | quercetin | Serum paraoxonase/arylesterase 1 | PON1 |
| Duzhong | MOL000098 | quercetin | Type I iodothyronine deiodinase | DIO1 |
| Duzhong | MOL000098 | quercetin | Procollagen C-endopeptidase enhancer 1 | PCOLCE |
| Duzhong | MOL000098 | quercetin | Puromycin-sensitive aminopeptidase | NPEPPS |
| Duzhong | MOL000098 | quercetin | Hexokinase-2 | HK2 |
| Duzhong | MOL000098 | quercetin | Ras GTPase-activating protein 1 | RASA1 |
| Duzhong | MOL000098 | quercetin | Glutathione S-transferase Mu 1 | GSTM1 |
| Duzhong | MOL000098 | quercetin | Glutathione S-transferase Mu 2 | GSTM2 |
| Duzhong | MOL002773 | beta-carotene | RAC-alpha serine/threonine-protein kinase | AKT1 |
| Duzhong | MOL002773 | beta-carotene | Apoptosis regulator Bcl-2 | BCL2 |
| Duzhong | MOL002773 | beta-carotene | Caspase-9 | CASP9 |
| Duzhong | MOL002773 | beta-carotene | 72 kDa type IV collagenase | MMP2 |
| Duzhong | MOL002773 | beta-carotene | Transcription factor AP-1 | JUN |
| Duzhong | MOL002773 | beta-carotene | Caspase-3 | CASP3 |
| Duzhong | MOL002773 | beta-carotene | Prostaglandin G/H synthase 2 | PTGS2 |
| Duzhong | MOL002773 | beta-carotene | Caspase-8 | CASP8 |
| Duzhong | MOL002773 | beta-carotene | Interstitial collagenase | MMP1 |
| Duzhong | MOL002773 | beta-carotene | Heme oxygenase 1 | HMOX1 |
| Duzhong | MOL002773 | beta-carotene | Cytochrome P450 3A4 | CYP3A4 |
| Duzhong | MOL002773 | beta-carotene | Serum albumin | ALB |
| Duzhong | MOL002773 | beta-carotene | Caveolin-1 | CAV1 |
| Duzhong | MOL002773 | beta-carotene | Catenin beta-1 | CTNNB1 |
| Duzhong | MOL002773 | beta-carotene | Myc proto-oncogene protein | MYC |
| Duzhong | MOL002773 | beta-carotene | Caspase-7 | CASP7 |
| Duzhong | MOL002773 | beta-carotene | Tissue factor | F3 |
| Duzhong | MOL002773 | beta-carotene | Gap junction alpha-1 protein | GJA1 |
| Duzhong | MOL008240 | (E)-3-[4-[(1R,2R)-2-hydroxy-2-(4-hydroxy-3-methoxy-phenyl)-1-methylol-ethoxy]-3-methoxy-phenyl]acrolein | Nitric oxide synthase, inducible | NOS2 |
| Duzhong | MOL008240 | (E)-3-[4-[(1R,2R)-2-hydroxy-2-(4-hydroxy-3-methoxy-phenyl)-1-methylol-ethoxy]-3-methoxy-phenyl]acrolein | Prothrombin | F2 |
| Duzhong | MOL008240 | (E)-3-[4-[(1R,2R)-2-hydroxy-2-(4-hydroxy-3-methoxy-phenyl)-1-methylol-ethoxy]-3-methoxy-phenyl]acrolein | Estrogen receptor | ESR1 |
| Duzhong | MOL008240 | (E)-3-[4-[(1R,2R)-2-hydroxy-2-(4-hydroxy-3-methoxy-phenyl)-1-methylol-ethoxy]-3-methoxy-phenyl]acrolein | Peroxisome proliferator-activated receptor gamma | PPARG |
| Duzhong | MOL008240 | (E)-3-[4-[(1R,2R)-2-hydroxy-2-(4-hydroxy-3-methoxy-phenyl)-1-methylol-ethoxy]-3-methoxy-phenyl]acrolein | Coagulation factor X | F10 |
| Duzhong | MOL008240 | (E)-3-[4-[(1R,2R)-2-hydroxy-2-(4-hydroxy-3-methoxy-phenyl)-1-methylol-ethoxy]-3-methoxy-phenyl]acrolein | Prostaglandin G/H synthase 2 | PTGS2 |
| Duzhong | MOL008240 | (E)-3-[4-[(1R,2R)-2-hydroxy-2-(4-hydroxy-3-methoxy-phenyl)-1-methylol-ethoxy]-3-methoxy-phenyl]acrolein | Coagulation factor VII | F7 |
| Duzhong | MOL008240 | (E)-3-[4-[(1R,2R)-2-hydroxy-2-(4-hydroxy-3-methoxy-phenyl)-1-methylol-ethoxy]-3-methoxy-phenyl]acrolein | Dipeptidyl peptidase 4 | DPP4 |
| Duzhong | MOL008240 | (E)-3-[4-[(1R,2R)-2-hydroxy-2-(4-hydroxy-3-methoxy-phenyl)-1-methylol-ethoxy]-3-methoxy-phenyl]acrolein | Mitogen-activated protein kinase 14 | MAPK14 |
| Duzhong | MOL008240 | (E)-3-[4-[(1R,2R)-2-hydroxy-2-(4-hydroxy-3-methoxy-phenyl)-1-methylol-ethoxy]-3-methoxy-phenyl]acrolein | Glycogen synthase kinase-3 beta | GSK3B |
| Duzhong | MOL008240 | (E)-3-[4-[(1R,2R)-2-hydroxy-2-(4-hydroxy-3-methoxy-phenyl)-1-methylol-ethoxy]-3-methoxy-phenyl]acrolein | Heat shock protein HSP 90-alpha | HSP90AA1 |
| Duzhong | MOL008240 | (E)-3-[4-[(1R,2R)-2-hydroxy-2-(4-hydroxy-3-methoxy-phenyl)-1-methylol-ethoxy]-3-methoxy-phenyl]acrolein | Trypsin-1 | PRSS1 |
| Duzhong | MOL008240 | (E)-3-[4-[(1R,2R)-2-hydroxy-2-(4-hydroxy-3-methoxy-phenyl)-1-methylol-ethoxy]-3-methoxy-phenyl]acrolein | Cyclin-A2 | CCNA2 |
| Duzhong | MOL011604 | Syringetin | Nitric oxide synthase, inducible | NOS2 |
| Duzhong | MOL011604 | Syringetin | Estrogen receptor | ESR1 |
| Duzhong | MOL011604 | Syringetin | Androgen receptor | AR |
| Duzhong | MOL011604 | Syringetin | Sodium channel protein type 5 subunit alpha | SCN5A |
| Duzhong | MOL011604 | Syringetin | Peroxisome proliferator-activated receptor gamma | PPARG |
| Duzhong | MOL011604 | Syringetin | Prostaglandin G/H synthase 2 | PTGS2 |
| Duzhong | MOL011604 | Syringetin | Coagulation factor VII | F7 |
| Duzhong | MOL011604 | Syringetin | DNA topoisomerase 2-alpha | TOP2A |
| Duzhong | MOL011604 | Syringetin | Estrogen receptor beta | ESR2 |
| Duzhong | MOL011604 | Syringetin | Dipeptidyl peptidase 4 | DPP4 |
| Duzhong | MOL011604 | Syringetin | Mitogen-activated protein kinase 14 | MAPK14 |
| Duzhong | MOL011604 | Syringetin | Glycogen synthase kinase-3 beta | GSK3B |
| Duzhong | MOL011604 | Syringetin | Heat shock protein HSP 90-alpha | HSP90AA1 |
| Duzhong | MOL011604 | Syringetin | Trypsin-1 | PRSS1 |
| Duzhong | MOL011604 | Syringetin | Cyclin-A2 | CCNA2 |
| Duzhong | MOL011604 | Syringetin | Nuclear receptor coactivator 2 | NCOA2 |
| Heidou | MOL000449 | Stigmasterol | Progesterone receptor | PGR |
| Heidou | MOL000449 | Stigmasterol | Mineralocorticoid receptor | NR3C2 |
| Heidou | MOL000449 | Stigmasterol | Nuclear receptor coactivator 2 | NCOA2 |
| Heidou | MOL000449 | Stigmasterol | Retinoic acid receptor RXR-alpha | RXRA |
| Heidou | MOL000449 | Stigmasterol | Nuclear receptor coactivator 1 | NCOA1 |
| Heidou | MOL000449 | Stigmasterol | Prostaglandin G/H synthase 1 | PTGS1 |
| Heidou | MOL000449 | Stigmasterol | Prostaglandin G/H synthase 2 | PTGS2 |
| Heidou | MOL000449 | Stigmasterol | Alpha-2A adrenergic receptor | ADRA2A |
| Heidou | MOL000449 | Stigmasterol | Sodium-dependent noradrenaline transporter | SLC6A2 |
| Heidou | MOL000449 | Stigmasterol | Sodium-dependent dopamine transporter | SLC6A3 |
| Heidou | MOL000449 | Stigmasterol | Beta-2 adrenergic receptor | ADRB2 |
| Heidou | MOL000449 | Stigmasterol | Urokinase-type plasminogen activator | PLAU |
| Heidou | MOL000449 | Stigmasterol | Leukotriene A-4 hydrolase | LTA4H |
| Heidou | MOL000449 | Stigmasterol | Amine oxidase [flavin-containing] B | MAOB |
| Heidou | MOL000449 | Stigmasterol | Amine oxidase [flavin-containing] A | MAOA |
| Heidou | MOL000449 | Stigmasterol | cAMP-dependent protein kinase catalytic subunit alpha | PRKACA |
| Heidou | MOL000449 | Stigmasterol | Chymotrypsinogen B | CTRB1 |
| Heidou | MOL000449 | Stigmasterol | Muscarinic acetylcholine receptor M3 | CHRM3 |
| Heidou | MOL000449 | Stigmasterol | Muscarinic acetylcholine receptor M1 | CHRM1 |
| Heidou | MOL000449 | Stigmasterol | Beta-1 adrenergic receptor | ADRB1 |
| Heidou | MOL000449 | Stigmasterol | Sodium channel protein type 5 subunit alpha | SCN5A |
| Heidou | MOL000449 | Stigmasterol | Alpha-1A adrenergic receptor | ADRA1A |
| Heidou | MOL000449 | Stigmasterol | Muscarinic acetylcholine receptor M2 | CHRM2 |
| Heidou | MOL000449 | Stigmasterol | Alpha-1B adrenergic receptor | ADRA1B |
| Heidou | MOL000449 | Stigmasterol | Neuronal acetylcholine receptor subunit alpha-7 | CHRNA7 |
| Heidou | MOL000358 | beta-sitosterol | Progesterone receptor | PGR |
| Heidou | MOL000358 | beta-sitosterol | Nuclear receptor coactivator 2 | NCOA2 |
| Heidou | MOL000358 | beta-sitosterol | Prostaglandin G/H synthase 1 | PTGS1 |
| Heidou | MOL000358 | beta-sitosterol | Prostaglandin G/H synthase 2 | PTGS2 |
| Heidou | MOL000358 | beta-sitosterol | Heat shock protein HSP 90-alpha | HSP90AA1 |
| Heidou | MOL000358 | beta-sitosterol | Potassium voltage-gated channel subfamily H member 2 | KCNH2 |
| Heidou | MOL000358 | beta-sitosterol | cAMP-dependent protein kinase catalytic subunit alpha | PRKACA |
| Heidou | MOL000358 | beta-sitosterol | D(1A) dopamine receptor | DRD1 |
| Heidou | MOL000358 | beta-sitosterol | Muscarinic acetylcholine receptor M3 | CHRM3 |
| Heidou | MOL000358 | beta-sitosterol | Muscarinic acetylcholine receptor M1 | CHRM1 |
| Heidou | MOL000358 | beta-sitosterol | Sodium channel protein type 5 subunit alpha | SCN5A |
| Heidou | MOL000358 | beta-sitosterol | Muscarinic acetylcholine receptor M4 | CHRM4 |
| Heidou | MOL000358 | beta-sitosterol | cGMP-inhibited 3',5'-cyclic phosphodiesterase A | PDE3A |
| Heidou | MOL000358 | beta-sitosterol | Alpha-1A adrenergic receptor | ADRA1A |
| Heidou | MOL000358 | beta-sitosterol | Muscarinic acetylcholine receptor M2 | CHRM2 |
| Heidou | MOL000358 | beta-sitosterol | Alpha-1B adrenergic receptor | ADRA1B |
| Heidou | MOL000358 | beta-sitosterol | Beta-2 adrenergic receptor | ADRB2 |
| Heidou | MOL000358 | beta-sitosterol | Neuronal acetylcholine receptor subunit alpha-2 | CHRNA2 |
| Heidou | MOL000358 | beta-sitosterol | Sodium-dependent serotonin transporter | SLC6A4 |
| Heidou | MOL000358 | beta-sitosterol | Mu-type opioid receptor | OPRM1 |
| Heidou | MOL000358 | beta-sitosterol | Neuronal acetylcholine receptor subunit alpha-7 | CHRNA7 |
| Heidou | MOL000358 | beta-sitosterol | Apoptosis regulator Bcl-2 | BCL2 |
| Heidou | MOL000358 | beta-sitosterol | Apoptosis regulator BAX | BAX |
| Heidou | MOL000358 | beta-sitosterol | Caspase-9 | CASP9 |
| Heidou | MOL000358 | beta-sitosterol | Transcription factor AP-1 | JUN |
| Heidou | MOL000358 | beta-sitosterol | Caspase-3 | CASP3 |
| Heidou | MOL000358 | beta-sitosterol | Caspase-8 | CASP8 |
| Heidou | MOL000358 | beta-sitosterol | Protein kinase C alpha type | PRKCA |
| Heidou | MOL000358 | beta-sitosterol | Serum paraoxonase/arylesterase 1 | PON1 |
| Heidou | MOL000358 | beta-sitosterol | Microtubule-associated protein 2 | MAP2 |
| Heidou | MOL003629 | Daidzein-4,7-diglucoside | DNA topoisomerase 2-alpha | TOP2A |
| Heidou | MOL000433 | FA | Prothrombin | F2 |
| Heidou | MOL000433 | FA | Glycogen synthase kinase-3 beta | GSK3B |
| Heidou | MOL004798 | delphinidin | Nitric oxide synthase, inducible | NOS2 |
| Heidou | MOL004798 | delphinidin | Prostaglandin G/H synthase 1 | PTGS1 |
| Heidou | MOL004798 | delphinidin | Androgen receptor | AR |
| Heidou | MOL004798 | delphinidin | Prostaglandin G/H synthase 2 | PTGS2 |
| Heidou | MOL004798 | delphinidin | Carbonic anhydrase 2 | CA2 |
| Heidou | MOL004798 | delphinidin | Heat shock protein HSP 90-alpha | HSP90AA1 |
| Heidou | MOL004798 | delphinidin | Nuclear receptor coactivator 2 | NCOA2 |
| Heidou | MOL005030 | gondoic acid | Prostaglandin G/H synthase 1 | PTGS1 |
| Heidou | MOL005030 | gondoic acid | Nuclear receptor coactivator 2 | NCOA2 |
| Heidou | MOL009706 | Pramoxine | Muscarinic acetylcholine receptor M3 | CHRM3 |
| Heidou | MOL009706 | Pramoxine | Muscarinic acetylcholine receptor M1 | CHRM1 |
| Heidou | MOL009706 | Pramoxine | Sodium channel protein type 5 subunit alpha | SCN5A |
| Heidou | MOL009706 | Pramoxine | Alpha-2C adrenergic receptor | ADRA2C |
| Heidou | MOL009706 | Pramoxine | Sodium-dependent noradrenaline transporter | SLC6A2 |
| Heidou | MOL009706 | Pramoxine | Alpha-1B adrenergic receptor | ADRA1B |
| Heidou | MOL009706 | Pramoxine | Sodium-dependent dopamine transporter | SLC6A3 |
| Heidou | MOL009706 | Pramoxine | Beta-2 adrenergic receptor | ADRB2 |
| Heidou | MOL009706 | Pramoxine | Sodium-dependent serotonin transporter | SLC6A4 |
| Heidou | MOL009706 | Pramoxine | Dipeptidyl peptidase 4 | DPP4 |
| Heidou | MOL009711 | Cycloartenone | Mineralocorticoid receptor | NR3C2 |
| Heidou | MOL009722 | L-Folinic acid | Carbonic anhydrase 2 | CA2 |
| Heidou | MOL009722 | L-Folinic acid | Trypsin-1 | PRSS1 |
| Heidou | MOL009729 | methyl (E)-nonadec-10-enoate | Nuclear receptor coactivator 2 | NCOA2 |
| Heidou | MOL009733 | methyl 12-oxooctadec-9-enoate | Nuclear receptor coactivator 2 | NCOA2 |
| Heidou | MOL009735 | N-(p-Hydroxyphenethyl) actinidine | Prostaglandin G/H synthase 1 | PTGS1 |
| Heidou | MOL009735 | N-(p-Hydroxyphenethyl) actinidine | Muscarinic acetylcholine receptor M3 | CHRM3 |
| Heidou | MOL009735 | N-(p-Hydroxyphenethyl) actinidine | Muscarinic acetylcholine receptor M1 | CHRM1 |
| Heidou | MOL009735 | N-(p-Hydroxyphenethyl) actinidine | Sodium channel protein type 5 subunit alpha | SCN5A |
| Heidou | MOL009735 | N-(p-Hydroxyphenethyl) actinidine | Muscarinic acetylcholine receptor M5 | CHRM5 |
| Heidou | MOL009735 | N-(p-Hydroxyphenethyl) actinidine | Prostaglandin G/H synthase 2 | PTGS2 |
| Heidou | MOL009735 | N-(p-Hydroxyphenethyl) actinidine | Retinoic acid receptor RXR-alpha | RXRA |
| Heidou | MOL009735 | N-(p-Hydroxyphenethyl) actinidine | cGMP-inhibited 3',5'-cyclic phosphodiesterase A | PDE3A |
| Heidou | MOL009735 | N-(p-Hydroxyphenethyl) actinidine | Muscarinic acetylcholine receptor M2 | CHRM2 |
| Heidou | MOL009735 | N-(p-Hydroxyphenethyl) actinidine | Sodium-dependent dopamine transporter | SLC6A3 |
| Heidou | MOL009735 | N-(p-Hydroxyphenethyl) actinidine | Beta-2 adrenergic receptor | ADRB2 |
| Heidou | MOL009735 | N-(p-Hydroxyphenethyl) actinidine | Sodium-dependent serotonin transporter | SLC6A4 |
| Heidou | MOL009735 | N-(p-Hydroxyphenethyl) actinidine | Leukotriene A-4 hydrolase | LTA4H |
| Heidou | MOL009735 | N-(p-Hydroxyphenethyl) actinidine | Amine oxidase [flavin-containing] B | MAOB |
| Heidou | MOL009735 | N-(p-Hydroxyphenethyl) actinidine | cAMP-dependent protein kinase catalytic subunit alpha | PRKACA |
| Heidou | MOL009735 | N-(p-Hydroxyphenethyl) actinidine | cAMP-dependent protein kinase inhibitor alpha | PKIA |
| Jiegeng | MOL001689 | acacetin | Nitric oxide synthase, inducible | NOS2 |
| Jiegeng | MOL001689 | acacetin | Prostaglandin G/H synthase 1 | PTGS1 |
| Jiegeng | MOL001689 | acacetin | Androgen receptor | AR |
| Jiegeng | MOL001689 | acacetin | Prostaglandin G/H synthase 2 | PTGS2 |
| Jiegeng | MOL001689 | acacetin | Dipeptidyl peptidase 4 | DPP4 |
| Jiegeng | MOL001689 | acacetin | Heat shock protein HSP 90-alpha | HSP90AA1 |
| Jiegeng | MOL001689 | acacetin | cAMP-dependent protein kinase catalytic subunit alpha | PRKACA |
| Jiegeng | MOL001689 | acacetin | Trypsin-1 | PRSS1 |
| Jiegeng | MOL001689 | acacetin | Nuclear receptor coactivator 2 | NCOA2 |
| Jiegeng | MOL001689 | acacetin | Nuclear receptor coactivator 1 | NCOA1 |
| Jiegeng | MOL001689 | acacetin | Serine/threonine-protein kinase Chk1 | CHEK1 |
| Jiegeng | MOL001689 | acacetin | Beta-2 adrenergic receptor | ADRB2 |
| Jiegeng | MOL001689 | acacetin | cGMP-inhibited 3',5'-cyclic phosphodiesterase A | PDE3A |
| Jiegeng | MOL001689 | acacetin | Transcription factor p65 | RELA |
| Jiegeng | MOL001689 | acacetin | Apoptosis regulator Bcl-2 | BCL2 |
| Jiegeng | MOL001689 | acacetin | Cyclin-dependent kinase inhibitor 1 | CDKN1A |
| Jiegeng | MOL001689 | acacetin | Apoptosis regulator BAX | BAX |
| Jiegeng | MOL001689 | acacetin | Caspase-3 | CASP3 |
| Jiegeng | MOL001689 | acacetin | Cellular tumor antigen p53 | TP53 |
| Jiegeng | MOL001689 | acacetin | Caspase-8 | CASP8 |
| Jiegeng | MOL001689 | acacetin | Fatty acid synthase | FASN |
| Jiegeng | MOL001689 | acacetin | Tumor necrosis factor ligand superfamily member 6 | FASLG |
| Jiegeng | MOL004355 | Spinasterol | Progesterone receptor | PGR |
| Jiegeng | MOL004355 | Spinasterol | Mineralocorticoid receptor | NR3C2 |
| Jiegeng | MOL004355 | Spinasterol | Nuclear receptor coactivator 2 | NCOA2 |
| Jiegeng | MOL004580 | cis-Dihydroquercetin | Prostaglandin G/H synthase 1 | PTGS1 |
| Jiegeng | MOL004580 | cis-Dihydroquercetin | Prostaglandin G/H synthase 2 | PTGS2 |
| Jiegeng | MOL004580 | cis-Dihydroquercetin | Heat shock protein HSP 90-alpha | HSP90AA1 |
| Jiegeng | MOL004580 | cis-Dihydroquercetin | Retinoic acid receptor RXR-alpha | RXRA |
| Jiegeng | MOL000006 | luteolin | Prostaglandin G/H synthase 1 | PTGS1 |
| Jiegeng | MOL000006 | luteolin | Androgen receptor | AR |
| Jiegeng | MOL000006 | luteolin | Prostaglandin G/H synthase 2 | PTGS2 |
| Jiegeng | MOL000006 | luteolin | Heat shock protein HSP 90-alpha | HSP90AA1 |
| Jiegeng | MOL000006 | luteolin | Trypsin-1 | PRSS1 |
| Jiegeng | MOL000006 | luteolin | Nuclear receptor coactivator 2 | NCOA2 |
| Jiegeng | MOL000006 | luteolin | cAMP-dependent protein kinase catalytic subunit alpha | PRKACA |
| Jiegeng | MOL000006 | luteolin | Dipeptidyl peptidase 4 | DPP4 |
| Jiegeng | MOL000006 | luteolin | Transcription factor p65 | RELA |
| Jiegeng | MOL000006 | luteolin | Epidermal growth factor receptor | EGFR |
| Jiegeng | MOL000006 | luteolin | RAC-alpha serine/threonine-protein kinase | AKT1 |
| Jiegeng | MOL000006 | luteolin | G1/S-specific cyclin-D1 | CCND1 |
| Jiegeng | MOL000006 | luteolin | Bcl-2-like protein 1 | BCL2L1 |
| Jiegeng | MOL000006 | luteolin | Cyclin-dependent kinase inhibitor 1 | CDKN1A |
| Jiegeng | MOL000006 | luteolin | Caspase-9 | CASP9 |
| Jiegeng | MOL000006 | luteolin | 72 kDa type IV collagenase | MMP2 |
| Jiegeng | MOL000006 | luteolin | Matrix metalloproteinase-9 | MMP9 |
| Jiegeng | MOL000006 | luteolin | Mitogen-activated protein kinase 1 | MAPK1 |
| Jiegeng | MOL000006 | luteolin | Interleukin-10 | IL10 |
| Jiegeng | MOL000006 | luteolin | Retinoblastoma-associated protein | RB1 |
| Jiegeng | MOL000006 | luteolin | Tumor necrosis factor | TNF |
| Jiegeng | MOL000006 | luteolin | Transcription factor AP-1 | JUN |
| Jiegeng | MOL000006 | luteolin | Interleukin-6 | IL6 |
| Jiegeng | MOL000006 | luteolin | Caspase-3 | CASP3 |
| Jiegeng | MOL000006 | luteolin | Cellular tumor antigen p53 | TP53 |
| Jiegeng | MOL000006 | luteolin | NF-kappa-B inhibitor alpha | NFKBIA |
| Jiegeng | MOL000006 | luteolin | DNA topoisomerase 1 | TOP1 |
| Jiegeng | MOL000006 | luteolin | E3 ubiquitin-protein ligase Mdm2 | MDM2 |
| Jiegeng | MOL000006 | luteolin | Amyloid beta A4 protein | APP |
| Jiegeng | MOL000006 | luteolin | Interstitial collagenase | MMP1 |
| Jiegeng | MOL000006 | luteolin | Proliferating cell nuclear antigen | PCNA |
| Jiegeng | MOL000006 | luteolin | Receptor tyrosine-protein kinase erbB-2 | ERBB2 |
| Jiegeng | MOL000006 | luteolin | Peroxisome proliferator-activated receptor gamma | PPARG |
| Jiegeng | MOL000006 | luteolin | Heme oxygenase 1 | HMOX1 |
| Jiegeng | MOL000006 | luteolin | Caspase-7 | CASP7 |
| Jiegeng | MOL000006 | luteolin | Intercellular adhesion molecule 1 | ICAM1 |
| Jiegeng | MOL000006 | luteolin | Induced myeloid leukemia cell differentiation protein Mcl-1 | MCL1 |
| Jiegeng | MOL000006 | luteolin | Baculoviral IAP repeat-containing protein 5 | BIRC5 |
| Jiegeng | MOL000006 | luteolin | Interleukin-2 | IL2 |
| Jiegeng | MOL000006 | luteolin | G2/mitotic-specific cyclin-B1 | CCNB1 |
| Jiegeng | MOL000006 | luteolin | Tyrosinase | TYR |
| Jiegeng | MOL000006 | luteolin | Interferon gamma | IFNG |
| Jiegeng | MOL000006 | luteolin | Interleukin-4 | IL4 |
| Jiegeng | MOL000006 | luteolin | DNA topoisomerase 2-alpha | TOP2A |
| Jiegeng | MOL000006 | luteolin | Solute carrier family 2, facilitated glucose transporter member 4 | SLC2A4 |
| Jiegeng | MOL000006 | luteolin | Insulin receptor | INSR |
| Jiegeng | MOL000006 | luteolin | CD40 ligand | CD40LG |
| Jiegeng | MOL000006 | luteolin | Prostaglandin E synthase | PTGES |
| Jiegeng | MOL000006 | luteolin | Kinetochore protein Nuf2 | NUF2 |
| Jiegeng | MOL000006 | luteolin | Adenylate cyclase type 2 | ADCY2 |
| Jiegeng | MOL000006 | luteolin | Hepatocyte growth factor receptor | MET |
| Renshen | MOL002879 | Diop | Sodium channel protein type 5 subunit alpha | SCN5A |
| Renshen | MOL002879 | Diop | Beta-2 adrenergic receptor | ADRB2 |
| Renshen | MOL002879 | Diop | Muscarinic acetylcholine receptor M3 | CHRM3 |
| Renshen | MOL000449 | Stigmasterol | Progesterone receptor | PGR |
| Renshen | MOL000449 | Stigmasterol | Mineralocorticoid receptor | NR3C2 |
| Renshen | MOL000449 | Stigmasterol | Nuclear receptor coactivator 2 | NCOA2 |
| Renshen | MOL000449 | Stigmasterol | Retinoic acid receptor RXR-alpha | RXRA |
| Renshen | MOL000449 | Stigmasterol | Nuclear receptor coactivator 1 | NCOA1 |
| Renshen | MOL000449 | Stigmasterol | Prostaglandin G/H synthase 1 | PTGS1 |
| Renshen | MOL000449 | Stigmasterol | Prostaglandin G/H synthase 2 | PTGS2 |
| Renshen | MOL000449 | Stigmasterol | Alpha-2A adrenergic receptor | ADRA2A |
| Renshen | MOL000449 | Stigmasterol | Sodium-dependent noradrenaline transporter | SLC6A2 |
| Renshen | MOL000449 | Stigmasterol | Sodium-dependent dopamine transporter | SLC6A3 |
| Renshen | MOL000449 | Stigmasterol | Beta-2 adrenergic receptor | ADRB2 |
| Renshen | MOL000449 | Stigmasterol | Urokinase-type plasminogen activator | PLAU |
| Renshen | MOL000449 | Stigmasterol | Leukotriene A-4 hydrolase | LTA4H |
| Renshen | MOL000449 | Stigmasterol | Amine oxidase [flavin-containing] B | MAOB |
| Renshen | MOL000449 | Stigmasterol | Amine oxidase [flavin-containing] A | MAOA |
| Renshen | MOL000449 | Stigmasterol | cAMP-dependent protein kinase catalytic subunit alpha | PRKACA |
| Renshen | MOL000449 | Stigmasterol | Chymotrypsinogen B | CTRB1 |
| Renshen | MOL000449 | Stigmasterol | Muscarinic acetylcholine receptor M3 | CHRM3 |
| Renshen | MOL000449 | Stigmasterol | Muscarinic acetylcholine receptor M1 | CHRM1 |
| Renshen | MOL000449 | Stigmasterol | Beta-1 adrenergic receptor | ADRB1 |
| Renshen | MOL000449 | Stigmasterol | Sodium channel protein type 5 subunit alpha | SCN5A |
| Renshen | MOL000449 | Stigmasterol | Alpha-1A adrenergic receptor | ADRA1A |
| Renshen | MOL000449 | Stigmasterol | Muscarinic acetylcholine receptor M2 | CHRM2 |
| Renshen | MOL000449 | Stigmasterol | Alpha-1B adrenergic receptor | ADRA1B |
| Renshen | MOL000449 | Stigmasterol | Neuronal acetylcholine receptor subunit alpha-7 | CHRNA7 |
| Renshen | MOL000358 | beta-sitosterol | Progesterone receptor | PGR |
| Renshen | MOL000358 | beta-sitosterol | Nuclear receptor coactivator 2 | NCOA2 |
| Renshen | MOL000358 | beta-sitosterol | Prostaglandin G/H synthase 1 | PTGS1 |
| Renshen | MOL000358 | beta-sitosterol | Prostaglandin G/H synthase 2 | PTGS2 |
| Renshen | MOL000358 | beta-sitosterol | Heat shock protein HSP 90-alpha | HSP90AA1 |
| Renshen | MOL000358 | beta-sitosterol | Potassium voltage-gated channel subfamily H member 2 | KCNH2 |
| Renshen | MOL000358 | beta-sitosterol | cAMP-dependent protein kinase catalytic subunit alpha | PRKACA |
| Renshen | MOL000358 | beta-sitosterol | D(1A) dopamine receptor | DRD1 |
| Renshen | MOL000358 | beta-sitosterol | Muscarinic acetylcholine receptor M3 | CHRM3 |
| Renshen | MOL000358 | beta-sitosterol | Muscarinic acetylcholine receptor M1 | CHRM1 |
| Renshen | MOL000358 | beta-sitosterol | Sodium channel protein type 5 subunit alpha | SCN5A |
| Renshen | MOL000358 | beta-sitosterol | Muscarinic acetylcholine receptor M4 | CHRM4 |
| Renshen | MOL000358 | beta-sitosterol | cGMP-inhibited 3',5'-cyclic phosphodiesterase A | PDE3A |
| Renshen | MOL000358 | beta-sitosterol | Alpha-1A adrenergic receptor | ADRA1A |
| Renshen | MOL000358 | beta-sitosterol | Muscarinic acetylcholine receptor M2 | CHRM2 |
| Renshen | MOL000358 | beta-sitosterol | Alpha-1B adrenergic receptor | ADRA1B |
| Renshen | MOL000358 | beta-sitosterol | Beta-2 adrenergic receptor | ADRB2 |
| Renshen | MOL000358 | beta-sitosterol | Neuronal acetylcholine receptor subunit alpha-2 | CHRNA2 |
| Renshen | MOL000358 | beta-sitosterol | Sodium-dependent serotonin transporter | SLC6A4 |
| Renshen | MOL000358 | beta-sitosterol | Mu-type opioid receptor | OPRM1 |
| Renshen | MOL000358 | beta-sitosterol | Neuronal acetylcholine receptor subunit alpha-7 | CHRNA7 |
| Renshen | MOL000358 | beta-sitosterol | Apoptosis regulator Bcl-2 | BCL2 |
| Renshen | MOL000358 | beta-sitosterol | Apoptosis regulator BAX | BAX |
| Renshen | MOL000358 | beta-sitosterol | Caspase-9 | CASP9 |
| Renshen | MOL000358 | beta-sitosterol | Transcription factor AP-1 | JUN |
| Renshen | MOL000358 | beta-sitosterol | Caspase-3 | CASP3 |
| Renshen | MOL000358 | beta-sitosterol | Caspase-8 | CASP8 |
| Renshen | MOL000358 | beta-sitosterol | Protein kinase C alpha type | PRKCA |
| Renshen | MOL000358 | beta-sitosterol | Serum paraoxonase/arylesterase 1 | PON1 |
| Renshen | MOL000358 | beta-sitosterol | Microtubule-associated protein 2 | MAP2 |
| Renshen | MOL003648 | Inermin | Prostaglandin G/H synthase 1 | PTGS1 |
| Renshen | MOL003648 | Inermin | Muscarinic acetylcholine receptor M3 | CHRM3 |
| Renshen | MOL003648 | Inermin | Sodium channel protein type 5 subunit alpha | SCN5A |
| Renshen | MOL003648 | Inermin | Prostaglandin G/H synthase 2 | PTGS2 |
| Renshen | MOL003648 | Inermin | Retinoic acid receptor RXR-alpha | RXRA |
| Renshen | MOL003648 | Inermin | Alpha-1B adrenergic receptor | ADRA1B |
| Renshen | MOL003648 | Inermin | Beta-2 adrenergic receptor | ADRB2 |
| Renshen | MOL003648 | Inermin | Alpha-1D adrenergic receptor | ADRA1D |
| Renshen | MOL003648 | Inermin | Sodium-dependent serotonin transporter | SLC6A4 |
| Renshen | MOL003648 | Inermin | Heat shock protein HSP 90-alpha | HSP90AA1 |
| Renshen | MOL003648 | Inermin | Neuronal acetylcholine receptor subunit alpha-7 | CHRNA7 |
| Renshen | MOL003648 | Inermin | cAMP-dependent protein kinase catalytic subunit alpha | PRKACA |
| Renshen | MOL003648 | Inermin | Trypsin-1 | PRSS1 |
| Renshen | MOL003648 | Inermin | Nuclear receptor coactivator 1 | NCOA1 |
| Renshen | MOL000422 | kaempferol | Nitric oxide synthase, inducible | NOS2 |
| Renshen | MOL000422 | kaempferol | Prostaglandin G/H synthase 1 | PTGS1 |
| Renshen | MOL000422 | kaempferol | Androgen receptor | AR |
| Renshen | MOL000422 | kaempferol | Peroxisome proliferator-activated receptor gamma | PPARG |
| Renshen | MOL000422 | kaempferol | Prostaglandin G/H synthase 2 | PTGS2 |
| Renshen | MOL000422 | kaempferol | Heat shock protein HSP 90-alpha | HSP90AA1 |
| Renshen | MOL000422 | kaempferol | cAMP-dependent protein kinase catalytic subunit alpha | PRKACA |
| Renshen | MOL000422 | kaempferol | Nuclear receptor coactivator 2 | NCOA2 |
| Renshen | MOL000422 | kaempferol | Dipeptidyl peptidase 4 | DPP4 |
| Renshen | MOL000422 | kaempferol | Trypsin-1 | PRSS1 |
| Renshen | MOL000422 | kaempferol | Progesterone receptor | PGR |
| Renshen | MOL000422 | kaempferol | Prothrombin | F2 |
| Renshen | MOL000422 | kaempferol | Muscarinic acetylcholine receptor M1 | CHRM1 |
| Renshen | MOL000422 | kaempferol | Acetylcholinesterase | ACHE |
| Renshen | MOL000422 | kaempferol | Sodium-dependent noradrenaline transporter | SLC6A2 |
| Renshen | MOL000422 | kaempferol | Muscarinic acetylcholine receptor M2 | CHRM2 |
| Renshen | MOL000422 | kaempferol | Alpha-1B adrenergic receptor | ADRA1B |
| Renshen | MOL000422 | kaempferol | DNA topoisomerase 2-alpha | TOP2A |
| Renshen | MOL000422 | kaempferol | Coagulation factor VII | F7 |
| Renshen | MOL000422 | kaempferol | Transcription factor p65 | RELA |
| Renshen | MOL000422 | kaempferol | Inhibitor of nuclear factor kappa-B kinase subunit beta | IKBKB |
| Renshen | MOL000422 | kaempferol | RAC-alpha serine/threonine-protein kinase | AKT1 |
| Renshen | MOL000422 | kaempferol | Apoptosis regulator Bcl-2 | BCL2 |
| Renshen | MOL000422 | kaempferol | Apoptosis regulator BAX | BAX |
| Renshen | MOL000422 | kaempferol | Tumor necrosis factor | TNF |
| Renshen | MOL000422 | kaempferol | Transcription factor AP-1 | JUN |
| Renshen | MOL000422 | kaempferol | Activator of 90 kDa heat shock protein ATPase homolog 1 | AHSA1 |
| Renshen | MOL000422 | kaempferol | Caspase-3 | CASP3 |
| Renshen | MOL000422 | kaempferol | Mitogen-activated protein kinase 8 | MAPK8 |
| Renshen | MOL000422 | kaempferol | Interstitial collagenase | MMP1 |
| Renshen | MOL000422 | kaempferol | Signal transducer and activator of transcription 1-alpha/beta | STAT1 |
| Renshen | MOL000422 | kaempferol | Peroxisome proliferator-activated receptor gamma | PPARG |
| Renshen | MOL000422 | kaempferol | Heme oxygenase 1 | HMOX1 |
| Renshen | MOL000422 | kaempferol | Cytochrome P450 3A4 | CYP3A4 |
| Renshen | MOL000422 | kaempferol | Cytochrome P450 1A1 | CYP1A1 |
| Renshen | MOL000422 | kaempferol | Intercellular adhesion molecule 1 | ICAM1 |
| Renshen | MOL000422 | kaempferol | E-selectin | SELE |
| Renshen | MOL000422 | kaempferol | Vascular cell adhesion protein 1 | VCAM1 |
| Renshen | MOL000422 | kaempferol | Nuclear receptor subfamily 1 group I member 2 | NR1I2 |
| Renshen | MOL000422 | kaempferol | Cytochrome P450 1B1 | CYP1B1 |
| Renshen | MOL000422 | kaempferol | Arachidonate 5-lipoxygenase | ALOX5 |
| Renshen | MOL000422 | kaempferol | Hyaluronan synthase 2 | HAS2 |
| Renshen | MOL000422 | kaempferol | Aryl hydrocarbon receptor | AHR |
| Renshen | MOL000422 | kaempferol | 26S proteasome non-ATPase regulatory subunit 3 | PSMD3 |
| Renshen | MOL000422 | kaempferol | Solute carrier family 2, facilitated glucose transporter member 4 | SLC2A4 |
| Renshen | MOL000422 | kaempferol | Nuclear receptor subfamily 1 group I member 3 | NR1I3 |
| Renshen | MOL000422 | kaempferol | Insulin receptor | INSR |
| Renshen | MOL000422 | kaempferol | Type I iodothyronine deiodinase | DIO1 |
| Renshen | MOL000422 | kaempferol | Serine/threonine-protein phosphatase 2B catalytic subunit alpha isoform | PPP3CA |
| Renshen | MOL000422 | kaempferol | Glutathione S-transferase Mu 1 | GSTM1 |
| Renshen | MOL000422 | kaempferol | Glutathione S-transferase Mu 2 | GSTM2 |
| Renshen | MOL000422 | kaempferol | Aldo-keto reductase family 1 member C3 | AKR1C3 |
| Renshen | MOL000422 | kaempferol | Antileukoproteinase | SLPI |
| Renshen | MOL005308 | Aposiopolamine | Muscarinic acetylcholine receptor M3 | CHRM3 |
| Renshen | MOL005308 | Aposiopolamine | Muscarinic acetylcholine receptor M1 | CHRM1 |
| Renshen | MOL005308 | Aposiopolamine | Sodium-dependent noradrenaline transporter | SLC6A2 |
| Renshen | MOL005308 | Aposiopolamine | Sodium-dependent dopamine transporter | SLC6A3 |
| Renshen | MOL005308 | Aposiopolamine | Beta-2 adrenergic receptor | ADRB2 |
| Renshen | MOL005308 | Aposiopolamine | Sodium-dependent serotonin transporter | SLC6A4 |
| Renshen | MOL005308 | Aposiopolamine | Dipeptidyl peptidase 4 | DPP4 |
| Renshen | MOL005317 | Deoxyharringtonine | Androgen receptor | AR |
| Renshen | MOL005317 | Deoxyharringtonine | Mineralocorticoid receptor | NR3C2 |
| Renshen | MOL005318 | Dianthramine | Prostaglandin G/H synthase 1 | PTGS1 |
| Renshen | MOL005318 | Dianthramine | Prostaglandin G/H synthase 2 | PTGS2 |
| Renshen | MOL005318 | Dianthramine | Heat shock protein HSP 90-alpha | HSP90AA1 |
| Renshen | MOL005320 | arachidonate | Prostaglandin G/H synthase 1 | PTGS1 |
| Renshen | MOL005320 | arachidonate | Prostaglandin G/H synthase 2 | PTGS2 |
| Renshen | MOL005320 | arachidonate | Retinoic acid receptor RXR-gamma | RXRG |
| Renshen | MOL005320 | arachidonate | Nuclear receptor coactivator 2 | NCOA2 |
| Renshen | MOL005321 | Frutinone A | Prostaglandin G/H synthase 1 | PTGS1 |
| Renshen | MOL005321 | Frutinone A | Prothrombin | F2 |
| Renshen | MOL005321 | Frutinone A | Androgen receptor | AR |
| Renshen | MOL005321 | Frutinone A | Sodium channel protein type 5 subunit alpha | SCN5A |
| Renshen | MOL005321 | Frutinone A | Peroxisome proliferator-activated receptor gamma | PPARG |
| Renshen | MOL005321 | Frutinone A | Prostaglandin G/H synthase 2 | PTGS2 |
| Renshen | MOL005321 | Frutinone A | Retinoic acid receptor RXR-alpha | RXRA |
| Renshen | MOL005321 | Frutinone A | cGMP-inhibited 3',5'-cyclic phosphodiesterase A | PDE3A |
| Renshen | MOL005321 | Frutinone A | Beta-2 adrenergic receptor | ADRB2 |
| Renshen | MOL005321 | Frutinone A | Dipeptidyl peptidase 4 | DPP4 |
| Renshen | MOL005321 | Frutinone A | Heat shock protein HSP 90-alpha | HSP90AA1 |
| Renshen | MOL005321 | Frutinone A | Neuronal acetylcholine receptor subunit alpha-7 | CHRNA7 |
| Renshen | MOL005321 | Frutinone A | cAMP-dependent protein kinase catalytic subunit alpha | PRKACA |
| Renshen | MOL005321 | Frutinone A | Acetylcholinesterase | ACHE |
| Renshen | MOL005344 | ginsenoside rh2 | Apoptosis regulator BAX | BAX |
| Renshen | MOL005344 | ginsenoside rh2 | Tumor necrosis factor | TNF |
| Renshen | MOL005344 | ginsenoside rh2 | Caspase-3 | CASP3 |
| Renshen | MOL005344 | ginsenoside rh2 | Prostaglandin G/H synthase 2 | PTGS2 |
| Renshen | MOL005344 | ginsenoside rh2 | NF-kappa-B inhibitor alpha | NFKBIA |
| Renshen | MOL005344 | ginsenoside rh2 | Interleukin-1 beta | IL1B |
| Renshen | MOL005344 | ginsenoside rh2 | Caspase-1 | CASP1 |
| Renshen | MOL005344 | ginsenoside rh2 | Interferon gamma | IFNG |
| Renshen | MOL005344 | ginsenoside rh2 | Pituitary adenylate cyclase-activating polypeptide | ADCYAP1 |
| Renshen | MOL005344 | ginsenoside rh2 | Proteasome assembly chaperone 1 | PSMG1 |
| Renshen | MOL005344 | ginsenoside rh2 | Dual specificity mitogen-activated protein kinase kinase 4 | MAP2K4 |
| Renshen | MOL005344 | ginsenoside rh2 | Solute carrier family 2, facilitated glucose transporter member 4 | SLC2A4 |
| Renshen | MOL005348 | Ginsenoside-Rh4_qt | Mineralocorticoid receptor | NR3C2 |
| Renshen | MOL005348 | Ginsenoside-Rh4_qt | Nuclear receptor coactivator 2 | NCOA2 |
| Renshen | MOL005356 | Girinimbin | Prostaglandin G/H synthase 1 | PTGS1 |
| Renshen | MOL005356 | Girinimbin | Sodium channel protein type 5 subunit alpha | SCN5A |
| Renshen | MOL005356 | Girinimbin | Prostaglandin G/H synthase 2 | PTGS2 |
| Renshen | MOL005356 | Girinimbin | Retinoic acid receptor RXR-alpha | RXRA |
| Renshen | MOL005356 | Girinimbin | Beta-2 adrenergic receptor | ADRB2 |
| Renshen | MOL005356 | Girinimbin | Neuronal acetylcholine receptor subunit alpha-7 | CHRNA7 |
| Renshen | MOL005356 | Girinimbin | cAMP-dependent protein kinase catalytic subunit alpha | PRKACA |
| Renshen | MOL005356 | Girinimbin | Nuclear receptor coactivator 2 | NCOA2 |
| Renshen | MOL005376 | Panaxadiol | Glucocorticoid receptor | NR3C1 |
| Renshen | MOL005384 | suchilactone | Potassium voltage-gated channel subfamily H member 2 | KCNH2 |
| Renshen | MOL005384 | suchilactone | Sodium channel protein type 5 subunit alpha | SCN5A |
| Renshen | MOL005384 | suchilactone | Coagulation factor X | F10 |
| Renshen | MOL005384 | suchilactone | Prostaglandin G/H synthase 2 | PTGS2 |
| Renshen | MOL005384 | suchilactone | Coagulation factor VII | F7 |
| Renshen | MOL005384 | suchilactone | Tyrosine-protein phosphatase non-receptor type 1 | PTPN1 |
| Renshen | MOL005384 | suchilactone | Beta-2 adrenergic receptor | ADRB2 |
| Renshen | MOL005384 | suchilactone | Heat shock protein HSP 90-alpha | HSP90AA1 |
| Renshen | MOL005384 | suchilactone | Nuclear receptor coactivator 1 | NCOA1 |
| Renshen | MOL005384 | suchilactone | Prostaglandin G/H synthase 1 | PTGS1 |
| Renshen | MOL005384 | suchilactone | Retinoic acid receptor RXR-alpha | RXRA |
| Renshen | MOL005384 | suchilactone | cGMP-inhibited 3',5'-cyclic phosphodiesterase A | PDE3A |
| Renshen | MOL005384 | suchilactone | Alpha-1D adrenergic receptor | ADRA1D |
| Renshen | MOL005384 | suchilactone | cAMP-dependent protein kinase catalytic subunit alpha | PRKACA |
| Renshen | MOL005399 | alexandrin_qt | Progesterone receptor | PGR |
| Renshen | MOL000787 | Fumarine | Prostaglandin G/H synthase 1 | PTGS1 |
| Renshen | MOL000787 | Fumarine | Muscarinic acetylcholine receptor M3 | CHRM3 |
| Renshen | MOL000787 | Fumarine | Potassium voltage-gated channel subfamily H member 2 | KCNH2 |
| Renshen | MOL000787 | Fumarine | Muscarinic acetylcholine receptor M1 | CHRM1 |
| Renshen | MOL000787 | Fumarine | Sodium channel protein type 5 subunit alpha | SCN5A |
| Renshen | MOL000787 | Fumarine | Coagulation factor X | F10 |
| Renshen | MOL000787 | Fumarine | Muscarinic acetylcholine receptor M5 | CHRM5 |
| Renshen | MOL000787 | Fumarine | Prostaglandin G/H synthase 2 | PTGS2 |
| Renshen | MOL000787 | Fumarine | Coagulation factor VII | F7 |
| Renshen | MOL000787 | Fumarine | Muscarinic acetylcholine receptor M4 | CHRM4 |
| Renshen | MOL000787 | Fumarine | Delta-type opioid receptor | OPRD1 |
| Renshen | MOL000787 | Fumarine | Alpha-1B adrenergic receptor | ADRA1B |
| Renshen | MOL000787 | Fumarine | Beta-2 adrenergic receptor | ADRB2 |
| Renshen | MOL000787 | Fumarine | Alpha-1D adrenergic receptor | ADRA1D |
| Renshen | MOL000787 | Fumarine | Mu-type opioid receptor | OPRM1 |
| Renshen | MOL000787 | Fumarine | Heat shock protein HSP 90-alpha | HSP90AA1 |
| Renshen | MOL000787 | Fumarine | cAMP-dependent protein kinase catalytic subunit alpha | PRKACA |
| Renshen | MOL000787 | Fumarine | Sodium-dependent serotonin transporter | SLC6A4 |
| Renshen | MOL000787 | Fumarine | Voltage-dependent L-type calcium channel subunit alpha-1S | CACNA1S |
| Renshen | MOL000787 | Fumarine | cGMP-inhibited 3',5'-cyclic phosphodiesterase A | PDE3A |
| Renshen | MOL000787 | Fumarine | Sodium-dependent dopamine transporter | SLC6A3 |
| Renshen | MOL000787 | Fumarine | cAMP-specific 3',5'-cyclic phosphodiesterase 4D | PDE4D |
| Renshen | MOL000787 | Fumarine | DNA topoisomerase 2-alpha | TOP2A |
| Renshen | MOL000787 | Fumarine | D(1A) dopamine receptor | DRD1 |
| Renshen | MOL000787 | Fumarine | Vascular endothelial growth factor receptor 2 | KDR |
| Shanyao | MOL001559 | piperlonguminine | Muscarinic acetylcholine receptor M1 | CHRM1 |
| Shanyao | MOL001559 | piperlonguminine | Retinoic acid receptor RXR-alpha | RXRA |
| Shanyao | MOL001559 | piperlonguminine | cGMP-inhibited 3',5'-cyclic phosphodiesterase A | PDE3A |
| Shanyao | MOL001559 | piperlonguminine | Alpha-1B adrenergic receptor | ADRA1B |
| Shanyao | MOL001559 | piperlonguminine | Sodium-dependent dopamine transporter | SLC6A3 |
| Shanyao | MOL001559 | piperlonguminine | Beta-2 adrenergic receptor | ADRB2 |
| Shanyao | MOL001559 | piperlonguminine | Sodium-dependent serotonin transporter | SLC6A4 |
| Shanyao | MOL001559 | piperlonguminine | Leukotriene A-4 hydrolase | LTA4H |
| Shanyao | MOL001559 | piperlonguminine | Amine oxidase [flavin-containing] B | MAOB |
| Shanyao | MOL001559 | piperlonguminine | Serum amyloid A protein | SAA2 |
| Shanyao | MOL001736 | (-)-taxifolin | Prostaglandin G/H synthase 1 | PTGS1 |
| Shanyao | MOL001736 | (-)-taxifolin | Prostaglandin G/H synthase 2 | PTGS2 |
| Shanyao | MOL001736 | (-)-taxifolin | Heat shock protein HSP 90-alpha | HSP90AA1 |
| Shanyao | MOL000322 | Kadsurenone | Prostaglandin G/H synthase 1 | PTGS1 |
| Shanyao | MOL000322 | Kadsurenone | Muscarinic acetylcholine receptor M3 | CHRM3 |
| Shanyao | MOL000322 | Kadsurenone | Prothrombin | F2 |
| Shanyao | MOL000322 | Kadsurenone | Potassium voltage-gated channel subfamily H member 2 | KCNH2 |
| Shanyao | MOL000322 | Kadsurenone | Muscarinic acetylcholine receptor M1 | CHRM1 |
| Shanyao | MOL000322 | Kadsurenone | Sodium channel protein type 5 subunit alpha | SCN5A |
| Shanyao | MOL000322 | Kadsurenone | Coagulation factor X | F10 |
| Shanyao | MOL000322 | Kadsurenone | Muscarinic acetylcholine receptor M5 | CHRM5 |
| Shanyao | MOL000322 | Kadsurenone | Prostaglandin G/H synthase 2 | PTGS2 |
| Shanyao | MOL000322 | Kadsurenone | Carbonic anhydrase 2 | CA2 |
| Shanyao | MOL000322 | Kadsurenone | Acetylcholinesterase | ACHE |
| Shanyao | MOL000322 | Kadsurenone | Muscarinic acetylcholine receptor M2 | CHRM2 |
| Shanyao | MOL000322 | Kadsurenone | Alpha-1B adrenergic receptor | ADRA1B |
| Shanyao | MOL000322 | Kadsurenone | Beta-2 adrenergic receptor | ADRB2 |
| Shanyao | MOL000322 | Kadsurenone | Alpha-1D adrenergic receptor | ADRA1D |
| Shanyao | MOL000322 | Kadsurenone | DNA topoisomerase 2-alpha | TOP2A |
| Shanyao | MOL000322 | Kadsurenone | Mu-type opioid receptor | OPRM1 |
| Shanyao | MOL000322 | Kadsurenone | Dipeptidyl peptidase 4 | DPP4 |
| Shanyao | MOL000322 | Kadsurenone | Beta-secretase 1 | BACE1 |
| Shanyao | MOL000322 | Kadsurenone | Heat shock protein HSP 90-alpha | HSP90AA1 |
| Shanyao | MOL000322 | Kadsurenone | Trypsin-1 | PRSS1 |
| Shanyao | MOL000322 | Kadsurenone | Nuclear receptor coactivator 2 | NCOA2 |
| Shanyao | MOL000322 | Kadsurenone | Nuclear receptor coactivator 1 | NCOA1 |
| Shanyao | MOL000322 | Kadsurenone | Retinoic acid receptor RXR-alpha | RXRA |
| Shanyao | MOL000322 | Kadsurenone | cGMP-inhibited 3',5'-cyclic phosphodiesterase A | PDE3A |
| Shanyao | MOL005430 | hancinone C | Nitric oxide synthase, inducible | NOS2 |
| Shanyao | MOL005430 | hancinone C | Muscarinic acetylcholine receptor M3 | CHRM3 |
| Shanyao | MOL005430 | hancinone C | Prothrombin | F2 |
| Shanyao | MOL005430 | hancinone C | Potassium voltage-gated channel subfamily H member 2 | KCNH2 |
| Shanyao | MOL005430 | hancinone C | Muscarinic acetylcholine receptor M1 | CHRM1 |
| Shanyao | MOL005430 | hancinone C | Estrogen receptor | ESR1 |
| Shanyao | MOL005430 | hancinone C | Sodium channel protein type 5 subunit alpha | SCN5A |
| Shanyao | MOL005430 | hancinone C | Coagulation factor X | F10 |
| Shanyao | MOL005430 | hancinone C | Prostaglandin G/H synthase 2 | PTGS2 |
| Shanyao | MOL005430 | hancinone C | Coagulation factor VII | F7 |
| Shanyao | MOL005430 | hancinone C | cGMP-inhibited 3',5'-cyclic phosphodiesterase A | PDE3A |
| Shanyao | MOL005430 | hancinone C | Alpha-1B adrenergic receptor | ADRA1B |
| Shanyao | MOL005430 | hancinone C | Alpha-1D adrenergic receptor | ADRA1D |
| Shanyao | MOL005430 | hancinone C | DNA topoisomerase 2-alpha | TOP2A |
| Shanyao | MOL005430 | hancinone C | Estrogen receptor beta | ESR2 |
| Shanyao | MOL005430 | hancinone C | Dipeptidyl peptidase 4 | DPP4 |
| Shanyao | MOL005430 | hancinone C | Heat shock protein HSP 90-alpha | HSP90AA1 |
| Shanyao | MOL005430 | hancinone C | Trypsin-1 | PRSS1 |
| Shanyao | MOL005430 | hancinone C | Nuclear receptor coactivator 2 | NCOA2 |
| Shanyao | MOL005430 | hancinone C | Nuclear receptor coactivator 1 | NCOA1 |
| Shanyao | MOL005435 | 24-Methylcholest-5-enyl-3belta-O-glucopyranoside_qt | Progesterone receptor | PGR |
| Shanyao | MOL005438 | campesterol | Progesterone receptor | PGR |
| Shanyao | MOL005440 | Isofucosterol | Progesterone receptor | PGR |
| Shanyao | MOL005440 | Isofucosterol | Mineralocorticoid receptor | NR3C2 |
| Shanyao | MOL005440 | Isofucosterol | 4-aminobutyrate aminotransferase, mitochondrial | ABAT |
| Shanyao | MOL005440 | Isofucosterol | Lysozyme | LYZ |
| Shanyao | MOL005440 | Isofucosterol | Nuclear receptor coactivator 2 | NCOA2 |
| Shanyao | MOL000449 | Stigmasterol | Progesterone receptor | PGR |
| Shanyao | MOL000449 | Stigmasterol | Mineralocorticoid receptor | NR3C2 |
| Shanyao | MOL000449 | Stigmasterol | Nuclear receptor coactivator 2 | NCOA2 |
| Shanyao | MOL000449 | Stigmasterol | Retinoic acid receptor RXR-alpha | RXRA |
| Shanyao | MOL000449 | Stigmasterol | Nuclear receptor coactivator 1 | NCOA1 |
| Shanyao | MOL000449 | Stigmasterol | Prostaglandin G/H synthase 1 | PTGS1 |
| Shanyao | MOL000449 | Stigmasterol | Prostaglandin G/H synthase 2 | PTGS2 |
| Shanyao | MOL000449 | Stigmasterol | Alpha-2A adrenergic receptor | ADRA2A |
| Shanyao | MOL000449 | Stigmasterol | Sodium-dependent noradrenaline transporter | SLC6A2 |
| Shanyao | MOL000449 | Stigmasterol | Sodium-dependent dopamine transporter | SLC6A3 |
| Shanyao | MOL000449 | Stigmasterol | Beta-2 adrenergic receptor | ADRB2 |
| Shanyao | MOL000449 | Stigmasterol | Urokinase-type plasminogen activator | PLAU |
| Shanyao | MOL000449 | Stigmasterol | Leukotriene A-4 hydrolase | LTA4H |
| Shanyao | MOL000449 | Stigmasterol | Amine oxidase [flavin-containing] B | MAOB |
| Shanyao | MOL000449 | Stigmasterol | Amine oxidase [flavin-containing] A | MAOA |
| Shanyao | MOL000449 | Stigmasterol | cAMP-dependent protein kinase catalytic subunit alpha | PRKACA |
| Shanyao | MOL000449 | Stigmasterol | Chymotrypsinogen B | CTRB1 |
| Shanyao | MOL000449 | Stigmasterol | Muscarinic acetylcholine receptor M3 | CHRM3 |
| Shanyao | MOL000449 | Stigmasterol | Muscarinic acetylcholine receptor M1 | CHRM1 |
| Shanyao | MOL000449 | Stigmasterol | Beta-1 adrenergic receptor | ADRB1 |
| Shanyao | MOL000449 | Stigmasterol | Sodium channel protein type 5 subunit alpha | SCN5A |
| Shanyao | MOL000449 | Stigmasterol | Alpha-1A adrenergic receptor | ADRA1A |
| Shanyao | MOL000449 | Stigmasterol | Muscarinic acetylcholine receptor M2 | CHRM2 |
| Shanyao | MOL000449 | Stigmasterol | Alpha-1B adrenergic receptor | ADRA1B |
| Shanyao | MOL000449 | Stigmasterol | Neuronal acetylcholine receptor subunit alpha-7 | CHRNA7 |
| Shanyao | MOL005458 | Dioscoreside C_qt | Glucocorticoid receptor | NR3C1 |
| Shanyao | MOL005458 | Dioscoreside C_qt | Nuclear receptor coactivator 2 | NCOA2 |
| Shanyao | MOL000546 | diosgenin | Progesterone receptor | PGR |
| Shanyao | MOL000546 | diosgenin | Mineralocorticoid receptor | NR3C2 |
| Shanyao | MOL000546 | diosgenin | Transcription factor p65 | RELA |
| Shanyao | MOL000546 | diosgenin | RAC-alpha serine/threonine-protein kinase | AKT1 |
| Shanyao | MOL000546 | diosgenin | Cyclin-dependent kinase inhibitor 1 | CDKN1A |
| Shanyao | MOL000546 | diosgenin | Cellular tumor antigen p53 | TP53 |
| Shanyao | MOL000546 | diosgenin | Prostaglandin G/H synthase 2 | PTGS2 |
| Shanyao | MOL000546 | diosgenin | Fatty acid synthase | FASN |
| Shanyao | MOL000546 | diosgenin | Superoxide dismutase [Cu-Zn] | SOD1 |
| Shanyao | MOL000546 | diosgenin | Hypoxia-inducible factor 1-alpha | HIF1A |
| Shanyao | MOL000546 | diosgenin | Nuclear receptor subfamily 1 group I member 2 | NR1I2 |
| Shanyao | MOL000546 | diosgenin | Cytosolic phospholipase A2 | PLA2G4A |
| Shanyao | MOL000546 | diosgenin | Canalicular multispecific organic anion transporter 1 | ABCC2 |
| Shanyao | MOL000546 | diosgenin | Serine/threonine-protein kinase mTOR | MTOR |
| Shanyao | MOL005465 | AIDS180907 | Nitric oxide synthase, inducible | NOS2 |
| Shanyao | MOL005465 | AIDS180907 | Estrogen receptor | ESR1 |
| Shanyao | MOL005465 | AIDS180907 | Androgen receptor | AR |
| Shanyao | MOL005465 | AIDS180907 | Coagulation factor X | F10 |
| Shanyao | MOL005465 | AIDS180907 | Prostaglandin G/H synthase 2 | PTGS2 |
| Shanyao | MOL005465 | AIDS180907 | Coagulation factor VII | F7 |
| Shanyao | MOL005465 | AIDS180907 | DNA topoisomerase 2-alpha | TOP2A |
| Shanyao | MOL005465 | AIDS180907 | Glycogen synthase kinase-3 beta | GSK3B |
| Shanyao | MOL005465 | AIDS180907 | Cyclin-A2 | CCNA2 |
| Shanyao | MOL005465 | AIDS180907 | Nuclear receptor coactivator 2 | NCOA2 |
| Shanyao | MOL005465 | AIDS180907 | Nuclear receptor coactivator 1 | NCOA1 |
| Shanyao | MOL000953 | CLR | Progesterone receptor | PGR |
| Shanyao | MOL000953 | CLR | Mineralocorticoid receptor | NR3C2 |
| Shanyao | MOL000953 | CLR | Nuclear receptor coactivator 2 | NCOA2 |
| Tufuling | MOL013117 | 4,7-Dihydroxy-5-methoxyl-6-methyl-8-formyl-flavan | Prostaglandin G/H synthase 1 | PTGS1 |
| Tufuling | MOL013117 | 4,7-Dihydroxy-5-methoxyl-6-methyl-8-formyl-flavan | Sodium channel protein type 5 subunit alpha | SCN5A |
| Tufuling | MOL013117 | 4,7-Dihydroxy-5-methoxyl-6-methyl-8-formyl-flavan | Prostaglandin G/H synthase 2 | PTGS2 |
| Tufuling | MOL013117 | 4,7-Dihydroxy-5-methoxyl-6-methyl-8-formyl-flavan | cGMP-inhibited 3',5'-cyclic phosphodiesterase A | PDE3A |
| Tufuling | MOL013117 | 4,7-Dihydroxy-5-methoxyl-6-methyl-8-formyl-flavan | Heat shock protein HSP 90-alpha | HSP90AA1 |
| Tufuling | MOL013117 | 4,7-Dihydroxy-5-methoxyl-6-methyl-8-formyl-flavan | cAMP-dependent protein kinase catalytic subunit alpha | PRKACA |
| Tufuling | MOL013118 | Neoastilbin | Coagulation factor X | F10 |
| Tufuling | MOL013118 | Neoastilbin | Carbonic anhydrase 2 | CA2 |
| Tufuling | MOL013118 | Neoastilbin | DNA topoisomerase 2-alpha | TOP2A |
| Tufuling | MOL013119 | Enhydrin | Mineralocorticoid receptor | NR3C2 |
| Tufuling | MOL013129 | (2R,3R)-2-(3,5-dihydroxyphenyl)-3,5,7-trihydroxychroman-4-one | Prostaglandin G/H synthase 1 | PTGS1 |
| Tufuling | MOL013129 | (2R,3R)-2-(3,5-dihydroxyphenyl)-3,5,7-trihydroxychroman-4-one | Prostaglandin G/H synthase 2 | PTGS2 |
| Tufuling | MOL013129 | (2R,3R)-2-(3,5-dihydroxyphenyl)-3,5,7-trihydroxychroman-4-one | Carbonic anhydrase 2 | CA2 |
| Tufuling | MOL013129 | (2R,3R)-2-(3,5-dihydroxyphenyl)-3,5,7-trihydroxychroman-4-one | Heat shock protein HSP 90-alpha | HSP90AA1 |
| Tufuling | MOL001736 | (-)-taxifolin | Prostaglandin G/H synthase 1 | PTGS1 |
| Tufuling | MOL001736 | (-)-taxifolin | Prostaglandin G/H synthase 2 | PTGS2 |
| Tufuling | MOL001736 | (-)-taxifolin | Heat shock protein HSP 90-alpha | HSP90AA1 |
| Tufuling | MOL000358 | beta-sitosterol | Progesterone receptor | PGR |
| Tufuling | MOL000358 | beta-sitosterol | Nuclear receptor coactivator 2 | NCOA2 |
| Tufuling | MOL000358 | beta-sitosterol | Prostaglandin G/H synthase 1 | PTGS1 |
| Tufuling | MOL000358 | beta-sitosterol | Prostaglandin G/H synthase 2 | PTGS2 |
| Tufuling | MOL000358 | beta-sitosterol | Heat shock protein HSP 90-alpha | HSP90AA1 |
| Tufuling | MOL000358 | beta-sitosterol | Potassium voltage-gated channel subfamily H member 2 | KCNH2 |
| Tufuling | MOL000358 | beta-sitosterol | cAMP-dependent protein kinase catalytic subunit alpha | PRKACA |
| Tufuling | MOL000358 | beta-sitosterol | D(1A) dopamine receptor | DRD1 |
| Tufuling | MOL000358 | beta-sitosterol | Muscarinic acetylcholine receptor M3 | CHRM3 |
| Tufuling | MOL000358 | beta-sitosterol | Muscarinic acetylcholine receptor M1 | CHRM1 |
| Tufuling | MOL000358 | beta-sitosterol | Sodium channel protein type 5 subunit alpha | SCN5A |
| Tufuling | MOL000358 | beta-sitosterol | Muscarinic acetylcholine receptor M4 | CHRM4 |
| Tufuling | MOL000358 | beta-sitosterol | cGMP-inhibited 3',5'-cyclic phosphodiesterase A | PDE3A |
| Tufuling | MOL000358 | beta-sitosterol | Alpha-1A adrenergic receptor | ADRA1A |
| Tufuling | MOL000358 | beta-sitosterol | Muscarinic acetylcholine receptor M2 | CHRM2 |
| Tufuling | MOL000358 | beta-sitosterol | Alpha-1B adrenergic receptor | ADRA1B |
| Tufuling | MOL000358 | beta-sitosterol | Beta-2 adrenergic receptor | ADRB2 |
| Tufuling | MOL000358 | beta-sitosterol | Neuronal acetylcholine receptor subunit alpha-2 | CHRNA2 |
| Tufuling | MOL000358 | beta-sitosterol | Sodium-dependent serotonin transporter | SLC6A4 |
| Tufuling | MOL000358 | beta-sitosterol | Mu-type opioid receptor | OPRM1 |
| Tufuling | MOL000358 | beta-sitosterol | Neuronal acetylcholine receptor subunit alpha-7 | CHRNA7 |
| Tufuling | MOL000358 | beta-sitosterol | Apoptosis regulator Bcl-2 | BCL2 |
| Tufuling | MOL000358 | beta-sitosterol | Apoptosis regulator BAX | BAX |
| Tufuling | MOL000358 | beta-sitosterol | Caspase-9 | CASP9 |
| Tufuling | MOL000358 | beta-sitosterol | Transcription factor AP-1 | JUN |
| Tufuling | MOL000358 | beta-sitosterol | Caspase-3 | CASP3 |
| Tufuling | MOL000358 | beta-sitosterol | Caspase-8 | CASP8 |
| Tufuling | MOL000358 | beta-sitosterol | Protein kinase C alpha type | PRKCA |
| Tufuling | MOL000358 | beta-sitosterol | Serum paraoxonase/arylesterase 1 | PON1 |
| Tufuling | MOL000358 | beta-sitosterol | Microtubule-associated protein 2 | MAP2 |
| Tufuling | MOL000359 | sitosterol | Progesterone receptor | PGR |
| Tufuling | MOL000359 | sitosterol | Nuclear receptor coactivator 2 | NCOA2 |
| Tufuling | MOL000359 | sitosterol | Mineralocorticoid receptor | NR3C2 |
| Tufuling | MOL004328 | naringenin | Prostaglandin G/H synthase 1 | PTGS1 |
| Tufuling | MOL004328 | naringenin | Estrogen receptor | ESR1 |
| Tufuling | MOL004328 | naringenin | Prostaglandin G/H synthase 2 | PTGS2 |
| Tufuling | MOL004328 | naringenin | Heat shock protein HSP 90-alpha | HSP90AA1 |
| Tufuling | MOL004328 | naringenin | cAMP-dependent protein kinase catalytic subunit alpha | PRKACA |
| Tufuling | MOL004328 | naringenin | Transcription factor p65 | RELA |
| Tufuling | MOL004328 | naringenin | RAC-alpha serine/threonine-protein kinase | AKT1 |
| Tufuling | MOL004328 | naringenin | Apoptosis regulator Bcl-2 | BCL2 |
| Tufuling | MOL004328 | naringenin | Mitogen-activated protein kinase 3 | MAPK3 |
| Tufuling | MOL004328 | naringenin | Mitogen-activated protein kinase 1 | MAPK1 |
| Tufuling | MOL004328 | naringenin | Caspase-3 | CASP3 |
| Tufuling | MOL004328 | naringenin | Fatty acid synthase | FASN |
| Tufuling | MOL004328 | naringenin | Low-density lipoprotein receptor | LDLR |
| Tufuling | MOL004328 | naringenin | Superoxide dismutase [Cu-Zn] | SOD1 |
| Tufuling | MOL004328 | naringenin | Peroxisome proliferator-activated receptor gamma | PPARG |
| Tufuling | MOL004328 | naringenin | Microsomal triglyceride transfer protein large subunit | MTTP |
| Tufuling | MOL004328 | naringenin | Apolipoprotein B-100 | APOB |
| Tufuling | MOL004328 | naringenin | Phospholipase B1, membrane-associated | PLB1 |
| Tufuling | MOL004328 | naringenin | 3-hydroxy-3-methylglutaryl-coenzyme A reductase | HMGCR |
| Tufuling | MOL004328 | naringenin | UDP-glucuronosyltransferase 1-1 | UGT1A1 |
| Tufuling | MOL004328 | naringenin | Peroxisome proliferator-activated receptor alpha | PPARA |
| Tufuling | MOL004328 | naringenin | Sterol regulatory element-binding protein 1 | SREBF1 |
| Tufuling | MOL004328 | naringenin | Glutathione reductase, mitochondrial | GSR |
| Tufuling | MOL004328 | naringenin | Multidrug resistance-associated protein 1 | ABCC1 |
| Tufuling | MOL004328 | naringenin | Adiponectin | ADIPOQ |
| Tufuling | MOL004328 | naringenin | Sterol O-acyltransferase 2 | SOAT2 |
| Tufuling | MOL004328 | naringenin | Aldo-keto reductase family 1 member C1 | AKR1C1 |
| Tufuling | MOL004328 | naringenin | Aspartate aminotransferase, cytoplasmic | GOT1 |
| Tufuling | MOL004328 | naringenin | 4-aminobutyrate aminotransferase, mitochondrial | ABAT |
| Tufuling | MOL004328 | naringenin | Liver carboxylesterase 1 | CES1 |
| Tufuling | MOL004328 | naringenin | Sterol O-acyltransferase 1 | SOAT1 |
| Tufuling | MOL000449 | Stigmasterol | Progesterone receptor | PGR |
| Tufuling | MOL000449 | Stigmasterol | Mineralocorticoid receptor | NR3C2 |
| Tufuling | MOL000449 | Stigmasterol | Nuclear receptor coactivator 2 | NCOA2 |
| Tufuling | MOL000449 | Stigmasterol | Retinoic acid receptor RXR-alpha | RXRA |
| Tufuling | MOL000449 | Stigmasterol | Nuclear receptor coactivator 1 | NCOA1 |
| Tufuling | MOL000449 | Stigmasterol | Prostaglandin G/H synthase 1 | PTGS1 |
| Tufuling | MOL000449 | Stigmasterol | Prostaglandin G/H synthase 2 | PTGS2 |
| Tufuling | MOL000449 | Stigmasterol | Alpha-2A adrenergic receptor | ADRA2A |
| Tufuling | MOL000449 | Stigmasterol | Sodium-dependent noradrenaline transporter | SLC6A2 |
| Tufuling | MOL000449 | Stigmasterol | Sodium-dependent dopamine transporter | SLC6A3 |
| Tufuling | MOL000449 | Stigmasterol | Beta-2 adrenergic receptor | ADRB2 |
| Tufuling | MOL000449 | Stigmasterol | Urokinase-type plasminogen activator | PLAU |
| Tufuling | MOL000449 | Stigmasterol | Leukotriene A-4 hydrolase | LTA4H |
| Tufuling | MOL000449 | Stigmasterol | Amine oxidase [flavin-containing] B | MAOB |
| Tufuling | MOL000449 | Stigmasterol | Amine oxidase [flavin-containing] A | MAOA |
| Tufuling | MOL000449 | Stigmasterol | cAMP-dependent protein kinase catalytic subunit alpha | PRKACA |
| Tufuling | MOL000449 | Stigmasterol | Chymotrypsinogen B | CTRB1 |
| Tufuling | MOL000449 | Stigmasterol | Muscarinic acetylcholine receptor M3 | CHRM3 |
| Tufuling | MOL000449 | Stigmasterol | Muscarinic acetylcholine receptor M1 | CHRM1 |
| Tufuling | MOL000449 | Stigmasterol | Beta-1 adrenergic receptor | ADRB1 |
| Tufuling | MOL000449 | Stigmasterol | Sodium channel protein type 5 subunit alpha | SCN5A |
| Tufuling | MOL000449 | Stigmasterol | Alpha-1A adrenergic receptor | ADRA1A |
| Tufuling | MOL000449 | Stigmasterol | Muscarinic acetylcholine receptor M2 | CHRM2 |
| Tufuling | MOL000449 | Stigmasterol | Alpha-1B adrenergic receptor | ADRA1B |
| Tufuling | MOL000449 | Stigmasterol | Neuronal acetylcholine receptor subunit alpha-7 | CHRNA7 |
| Tufuling | MOL004567 | isoengelitin | Coagulation factor X | F10 |
| Tufuling | MOL004567 | isoengelitin | Prostaglandin G/H synthase 2 | PTGS2 |
| Tufuling | MOL004567 | isoengelitin | DNA topoisomerase 2-alpha | TOP2A |
| Tufuling | MOL004575 | astilbin | Coagulation factor X | F10 |
| Tufuling | MOL004575 | astilbin | DNA topoisomerase 2-alpha | TOP2A |
| Tufuling | MOL004575 | astilbin | Interleukin-10 | IL10 |
| Tufuling | MOL004575 | astilbin | Tumor necrosis factor | TNF |
| Tufuling | MOL004575 | astilbin | Interferon gamma | IFNG |
| Tufuling | MOL004576 | taxifolin | Prostaglandin G/H synthase 1 | PTGS1 |
| Tufuling | MOL004576 | taxifolin | Prostaglandin G/H synthase 2 | PTGS2 |
| Tufuling | MOL004576 | taxifolin | Heat shock protein HSP 90-alpha | HSP90AA1 |
| Tufuling | MOL004576 | taxifolin | Retinoic acid receptor RXR-alpha | RXRA |
| Tufuling | MOL004576 | taxifolin | Transcription factor p65 | RELA |
| Tufuling | MOL004576 | taxifolin | Intercellular adhesion molecule 1 | ICAM1 |
| Tufuling | MOL004576 | taxifolin | Diacylglycerol O-acyltransferase 2 | DGAT2 |
| Tufuling | MOL004576 | taxifolin | Microsomal triglyceride transfer protein large subunit | MTTP |
| Tufuling | MOL004576 | taxifolin | Apolipoprotein B-100 | APOB |
| Tufuling | MOL004580 | cis-Dihydroquercetin | Prostaglandin G/H synthase 1 | PTGS1 |
| Tufuling | MOL004580 | cis-Dihydroquercetin | Prostaglandin G/H synthase 2 | PTGS2 |
| Tufuling | MOL004580 | cis-Dihydroquercetin | Heat shock protein HSP 90-alpha | HSP90AA1 |
| Tufuling | MOL004580 | cis-Dihydroquercetin | Retinoic acid receptor RXR-alpha | RXRA |
| Tufuling | MOL000546 | diosgenin | Progesterone receptor | PGR |
| Tufuling | MOL000546 | diosgenin | Mineralocorticoid receptor | NR3C2 |
| Tufuling | MOL000546 | diosgenin | Transcription factor p65 | RELA |
| Tufuling | MOL000546 | diosgenin | RAC-alpha serine/threonine-protein kinase | AKT1 |
| Tufuling | MOL000546 | diosgenin | Cyclin-dependent kinase inhibitor 1 | CDKN1A |
| Tufuling | MOL000546 | diosgenin | Cellular tumor antigen p53 | TP53 |
| Tufuling | MOL000546 | diosgenin | Prostaglandin G/H synthase 2 | PTGS2 |
| Tufuling | MOL000546 | diosgenin | Fatty acid synthase | FASN |
| Tufuling | MOL000546 | diosgenin | Superoxide dismutase [Cu-Zn] | SOD1 |
| Tufuling | MOL000546 | diosgenin | Hypoxia-inducible factor 1-alpha | HIF1A |
| Tufuling | MOL000546 | diosgenin | Nuclear receptor subfamily 1 group I member 2 | NR1I2 |
| Tufuling | MOL000546 | diosgenin | Cytosolic phospholipase A2 | PLA2G4A |
| Tufuling | MOL000546 | diosgenin | Canalicular multispecific organic anion transporter 1 | ABCC2 |
| Tufuling | MOL000546 | diosgenin | Serine/threonine-protein kinase mTOR | MTOR |
| Tufuling | MOL000098 | quercetin | Prostaglandin G/H synthase 1 | PTGS1 |
| Tufuling | MOL000098 | quercetin | Androgen receptor | AR |
| Tufuling | MOL000098 | quercetin | Peroxisome proliferator-activated receptor gamma | PPARG |
| Tufuling | MOL000098 | quercetin | Prostaglandin G/H synthase 2 | PTGS2 |
| Tufuling | MOL000098 | quercetin | Heat shock protein HSP 90-alpha | HSP90AA1 |
| Tufuling | MOL000098 | quercetin | Nuclear receptor coactivator 2 | NCOA2 |
| Tufuling | MOL000098 | quercetin | Dipeptidyl peptidase 4 | DPP4 |
| Tufuling | MOL000098 | quercetin | Trypsin-1 | PRSS1 |
| Tufuling | MOL000098 | quercetin | DNA topoisomerase 2-alpha | TOP2A |
| Tufuling | MOL000098 | quercetin | Prothrombin | F2 |
| Tufuling | MOL000098 | quercetin | Potassium voltage-gated channel subfamily H member 2 | KCNH2 |
| Tufuling | MOL000098 | quercetin | Sodium channel protein type 5 subunit alpha | SCN5A |
| Tufuling | MOL000098 | quercetin | Coagulation factor X | F10 |
| Tufuling | MOL000098 | quercetin | Beta-2 adrenergic receptor | ADRB2 |
| Tufuling | MOL000098 | quercetin | Stromelysin-1 | MMP3 |
| Tufuling | MOL000098 | quercetin | cAMP-dependent protein kinase catalytic subunit alpha | PRKACA |
| Tufuling | MOL000098 | quercetin | Coagulation factor VII | F7 |
| Tufuling | MOL000098 | quercetin | Retinoic acid receptor RXR-alpha | RXRA |
| Tufuling | MOL000098 | quercetin | Acetylcholinesterase | ACHE |
| Tufuling | MOL000098 | quercetin | Amine oxidase [flavin-containing] B | MAOB |
| Tufuling | MOL000098 | quercetin | Transcription factor p65 | RELA |
| Tufuling | MOL000098 | quercetin | Epidermal growth factor receptor | EGFR |
| Tufuling | MOL000098 | quercetin | RAC-alpha serine/threonine-protein kinase | AKT1 |
| Tufuling | MOL000098 | quercetin | G1/S-specific cyclin-D1 | CCND1 |
| Tufuling | MOL000098 | quercetin | Apoptosis regulator Bcl-2 | BCL2 |
| Tufuling | MOL000098 | quercetin | Bcl-2-like protein 1 | BCL2L1 |
| Tufuling | MOL000098 | quercetin | Proto-oncogene c-Fos | FOS |
| Tufuling | MOL000098 | quercetin | Cyclin-dependent kinase inhibitor 1 | CDKN1A |
| Tufuling | MOL000098 | quercetin | Eukaryotic translation initiation factor 6 | EIF6 |
| Tufuling | MOL000098 | quercetin | Apoptosis regulator BAX | BAX |
| Tufuling | MOL000098 | quercetin | Caspase-9 | CASP9 |
| Tufuling | MOL000098 | quercetin | Urokinase-type plasminogen activator | PLAU |
| Tufuling | MOL000098 | quercetin | 72 kDa type IV collagenase | MMP2 |
| Tufuling | MOL000098 | quercetin | Matrix metalloproteinase-9 | MMP9 |
| Tufuling | MOL000098 | quercetin | Mitogen-activated protein kinase 1 | MAPK1 |
| Tufuling | MOL000098 | quercetin | Interleukin-10 | IL10 |
| Tufuling | MOL000098 | quercetin | Retinoblastoma-associated protein | RB1 |
| Tufuling | MOL000098 | quercetin | Tumor necrosis factor | TNF |
| Tufuling | MOL000098 | quercetin | Transcription factor AP-1 | JUN |
| Tufuling | MOL000098 | quercetin | Interleukin-6 | IL6 |
| Tufuling | MOL000098 | quercetin | Activator of 90 kDa heat shock protein ATPase homolog 1 | AHSA1 |
| Tufuling | MOL000098 | quercetin | Caspase-3 | CASP3 |
| Tufuling | MOL000098 | quercetin | Cellular tumor antigen p53 | TP53 |
| Tufuling | MOL000098 | quercetin | ETS domain-containing protein Elk-1 | ELK1 |
| Tufuling | MOL000098 | quercetin | NF-kappa-B inhibitor alpha | NFKBIA |
| Tufuling | MOL000098 | quercetin | Ornithine decarboxylase | ODC1 |
| Tufuling | MOL000098 | quercetin | Caspase-8 | CASP8 |
| Tufuling | MOL000098 | quercetin | DNA topoisomerase 1 | TOP1 |
| Tufuling | MOL000098 | quercetin | RAF proto-oncogene serine/threonine-protein kinase | RAF1 |
| Tufuling | MOL000098 | quercetin | Superoxide dismutase [Cu-Zn] | SOD1 |
| Tufuling | MOL000098 | quercetin | Protein kinase C alpha type | PRKCA |
| Tufuling | MOL000098 | quercetin | Interstitial collagenase | MMP1 |
| Tufuling | MOL000098 | quercetin | Hypoxia-inducible factor 1-alpha | HIF1A |
| Tufuling | MOL000098 | quercetin | Signal transducer and activator of transcription 1-alpha/beta | STAT1 |
| Tufuling | MOL000098 | quercetin | Protein CBFA2T1 | RUNX1T1 |
| Tufuling | MOL000098 | quercetin | Receptor tyrosine-protein kinase erbB-2 | ERBB2 |
| Tufuling | MOL000098 | quercetin | Peroxisome proliferator-activated receptor gamma | PPARG |
| Tufuling | MOL000098 | quercetin | Acetyl-CoA carboxylase 1 | ACACA |
| Tufuling | MOL000098 | quercetin | Heme oxygenase 1 | HMOX1 |
| Tufuling | MOL000098 | quercetin | Cytochrome P450 3A4 | CYP3A4 |
| Tufuling | MOL000098 | quercetin | Caveolin-1 | CAV1 |
| Tufuling | MOL000098 | quercetin | Myc proto-oncogene protein | MYC |
| Tufuling | MOL000098 | quercetin | Tissue factor | F3 |
| Tufuling | MOL000098 | quercetin | Gap junction alpha-1 protein | GJA1 |
| Tufuling | MOL000098 | quercetin | Cytochrome P450 1A1 | CYP1A1 |
| Tufuling | MOL000098 | quercetin | Intercellular adhesion molecule 1 | ICAM1 |
| Tufuling | MOL000098 | quercetin | Interleukin-1 beta | IL1B |
| Tufuling | MOL000098 | quercetin | E-selectin | SELE |
| Tufuling | MOL000098 | quercetin | Vascular cell adhesion protein 1 | VCAM1 |
| Tufuling | MOL000098 | quercetin | Interleukin-8 | CXCL8 |
| Tufuling | MOL000098 | quercetin | Protein kinase C beta type | PRKCB |
| Tufuling | MOL000098 | quercetin | Baculoviral IAP repeat-containing protein 5 | BIRC5 |
| Tufuling | MOL000098 | quercetin | Dual oxidase 2 | DUOX2 |
| Tufuling | MOL000098 | quercetin | Nitric oxide synthase, endothelial | NOS3 |
| Tufuling | MOL000098 | quercetin | Heat shock protein beta-1 | HSPB1 |
| Tufuling | MOL000098 | quercetin | Maltase-glucoamylase, intestinal | MGAM |
| Tufuling | MOL000098 | quercetin | Interleukin-2 | IL2 |
| Tufuling | MOL000098 | quercetin | Nuclear receptor subfamily 1 group I member 2 | NR1I2 |
| Tufuling | MOL000098 | quercetin | Cytochrome P450 1B1 | CYP1B1 |
| Tufuling | MOL000098 | quercetin | G2/mitotic-specific cyclin-B1 | CCNB1 |
| Tufuling | MOL000098 | quercetin | Tissue-type plasminogen activator | PLAT |
| Tufuling | MOL000098 | quercetin | Thrombomodulin | THBD |
| Tufuling | MOL000098 | quercetin | Plasminogen activator inhibitor 1 | SERPINE1 |
| Tufuling | MOL000098 | quercetin | Interferon gamma | IFNG |
| Tufuling | MOL000098 | quercetin | Arachidonate 5-lipoxygenase | ALOX5 |
| Tufuling | MOL000098 | quercetin | Interleukin-1 alpha | IL1A |
| Tufuling | MOL000098 | quercetin | Myeloperoxidase | MPO |
| Tufuling | MOL000098 | quercetin | DNA topoisomerase 2-alpha | TOP2A |
| Tufuling | MOL000098 | quercetin | Neutrophil cytosol factor 1 | NCF1 |
| Tufuling | MOL000098 | quercetin | Hyaluronan synthase 2 | HAS2 |
| Tufuling | MOL000098 | quercetin | Nuclear factor erythroid 2-related factor 2 | NFE2L2 |
| Tufuling | MOL000098 | quercetin | NAD(P)H dehydrogenase [quinone] 1 | NQO1 |
| Tufuling | MOL000098 | quercetin | Poly [ADP-ribose] polymerase 1 | PARP1 |
| Tufuling | MOL000098 | quercetin | Aryl hydrocarbon receptor | AHR |
| Tufuling | MOL000098 | quercetin | 26S proteasome non-ATPase regulatory subunit 3 | PSMD3 |
| Tufuling | MOL000098 | quercetin | Solute carrier family 2, facilitated glucose transporter member 4 | SLC2A4 |
| Tufuling | MOL000098 | quercetin | Collagen alpha-1(III) chain | COL3A1 |
| Tufuling | MOL000098 | quercetin | C-X-C motif chemokine 11 | CXCL11 |
| Tufuling | MOL000098 | quercetin | C-X-C motif chemokine 2 | CXCL2 |
| Tufuling | MOL000098 | quercetin | DDB1- and CUL4-associated factor 5 | DCAF5 |
| Tufuling | MOL000098 | quercetin | Nuclear receptor subfamily 1 group I member 3 | NR1I3 |
| Tufuling | MOL000098 | quercetin | Serine/threonine-protein kinase Chk2 | CHEK2 |
| Tufuling | MOL000098 | quercetin | Insulin receptor | INSR |
| Tufuling | MOL000098 | quercetin | Claudin-4 | CLDN4 |
| Tufuling | MOL000098 | quercetin | Peroxisome proliferator-activated receptor alpha | PPARA |
| Tufuling | MOL000098 | quercetin | Peroxisome proliferator-activated receptor delta | PPARD |
| Tufuling | MOL000098 | quercetin | Heat shock factor protein 1 | HSF1 |
| Tufuling | MOL000098 | quercetin | C-reactive protein | CRP |
| Tufuling | MOL000098 | quercetin | C-X-C motif chemokine 10 | CXCL10 |
| Tufuling | MOL000098 | quercetin | Inhibitor of nuclear factor kappa-B kinase subunit alpha | CHUK |
| Tufuling | MOL000098 | quercetin | Osteopontin | SPP1 |
| Tufuling | MOL000098 | quercetin | Runt-related transcription factor 2 | RUNX2 |
| Tufuling | MOL000098 | quercetin | Ras association domain-containing protein 1 | RASSF1 |
| Tufuling | MOL000098 | quercetin | Transcription factor E2F1 | E2F1 |
| Tufuling | MOL000098 | quercetin | Transcription factor E2F2 | E2F2 |
| Tufuling | MOL000098 | quercetin | Prostatic acid phosphatase | ACP3 |
| Tufuling | MOL000098 | quercetin | Cathepsin D | CTSD |
| Tufuling | MOL000098 | quercetin | Insulin-like growth factor-binding protein 3 | IGFBP3 |
| Tufuling | MOL000098 | quercetin | Insulin-like growth factor II | IGF2 |
| Tufuling | MOL000098 | quercetin | CD40 ligand | CD40LG |
| Tufuling | MOL000098 | quercetin | Interferon regulatory factor 1 | IRF1 |
| Tufuling | MOL000098 | quercetin | Receptor tyrosine-protein kinase erbB-3 | ERBB3 |
| Tufuling | MOL000098 | quercetin | Serum paraoxonase/arylesterase 1 | PON1 |
| Tufuling | MOL000098 | quercetin | Type I iodothyronine deiodinase | DIO1 |
| Tufuling | MOL000098 | quercetin | Procollagen C-endopeptidase enhancer 1 | PCOLCE |
| Tufuling | MOL000098 | quercetin | Puromycin-sensitive aminopeptidase | NPEPPS |
| Tufuling | MOL000098 | quercetin | Hexokinase-2 | HK2 |
| Tufuling | MOL000098 | quercetin | Ras GTPase-activating protein 1 | RASA1 |
| Tufuling | MOL000098 | quercetin | Glutathione S-transferase Mu 1 | GSTM1 |
| Tufuling | MOL000098 | quercetin | Glutathione S-transferase Mu 2 | GSTM2 |
| Xiyangshen | MOL011442 | (8S,9S,10R,13R,14S,17R)-17-[(1R,4R)-4-ethyl-1,5-dimethylhexyl]-10,13-dimethyl-1,2,8,9,11,12,14,15,16,17-decahydrocyclopenta[a]phenanthren-7-one | Progesterone receptor | PGR |
| Xiyangshen | MOL011455 | 20-Hexadecanoylingenol | Mineralocorticoid receptor | NR3C2 |
| Xiyangshen | MOL000358 | beta-sitosterol | Progesterone receptor | PGR |
| Xiyangshen | MOL000358 | beta-sitosterol | Nuclear receptor coactivator 2 | NCOA2 |
| Xiyangshen | MOL000358 | beta-sitosterol | Heat shock protein HSP 90-alpha | HSP90AA1 |
| Xiyangshen | MOL000358 | beta-sitosterol | Potassium voltage-gated channel subfamily H member 2 | KCNH2 |
| Xiyangshen | MOL000358 | beta-sitosterol | cAMP-dependent protein kinase catalytic subunit alpha | PRKACA |
| Xiyangshen | MOL000358 | beta-sitosterol | D(1A) dopamine receptor | DRD1 |
| Xiyangshen | MOL000358 | beta-sitosterol | Muscarinic acetylcholine receptor M3 | CHRM3 |
| Xiyangshen | MOL000358 | beta-sitosterol | Muscarinic acetylcholine receptor M1 | CHRM1 |
| Xiyangshen | MOL000358 | beta-sitosterol | Sodium channel protein type 5 subunit alpha | SCN5A |
| Xiyangshen | MOL000358 | beta-sitosterol | Muscarinic acetylcholine receptor M4 | CHRM4 |
| Xiyangshen | MOL000358 | beta-sitosterol | cGMP-inhibited 3',5'-cyclic phosphodiesterase A | PDE3A |
| Xiyangshen | MOL000358 | beta-sitosterol | Alpha-1A adrenergic receptor | ADRA1A |
| Xiyangshen | MOL000358 | beta-sitosterol | Muscarinic acetylcholine receptor M2 | CHRM2 |
| Xiyangshen | MOL000358 | beta-sitosterol | Alpha-1B adrenergic receptor | ADRA1B |
| Xiyangshen | MOL000358 | beta-sitosterol | Beta-2 adrenergic receptor | ADRB2 |
| Xiyangshen | MOL000358 | beta-sitosterol | Neuronal acetylcholine receptor subunit alpha-2 | CHRNA2 |
| Xiyangshen | MOL000358 | beta-sitosterol | Sodium-dependent serotonin transporter | SLC6A4 |
| Xiyangshen | MOL000358 | beta-sitosterol | Mu-type opioid receptor | OPRM1 |
| Xiyangshen | MOL000358 | beta-sitosterol | Neuronal acetylcholine receptor subunit alpha-7 | CHRNA7 |
| Xiyangshen | MOL000358 | beta-sitosterol | Apoptosis regulator Bcl-2 | BCL2 |
| Xiyangshen | MOL000358 | beta-sitosterol | Apoptosis regulator BAX | BAX |
| Xiyangshen | MOL000358 | beta-sitosterol | Caspase-9 | CASP9 |
| Xiyangshen | MOL000358 | beta-sitosterol | Transcription factor AP-1 | JUN |
| Xiyangshen | MOL000358 | beta-sitosterol | Caspase-3 | CASP3 |
| Xiyangshen | MOL000358 | beta-sitosterol | Caspase-8 | CASP8 |
| Xiyangshen | MOL000358 | beta-sitosterol | Protein kinase C alpha type | PRKCA |
| Xiyangshen | MOL000358 | beta-sitosterol | Microtubule-associated protein 2 | MAP2 |
| Xiyangshen | MOL005344 | ginsenoside rh2 | Apoptosis regulator BAX | BAX |
| Xiyangshen | MOL005344 | ginsenoside rh2 | Tumor necrosis factor | TNF |
| Xiyangshen | MOL005344 | ginsenoside rh2 | Caspase-3 | CASP3 |
| Xiyangshen | MOL005344 | ginsenoside rh2 | NF-kappa-B inhibitor alpha | NFKBIA |
| Xiyangshen | MOL005344 | ginsenoside rh2 | Interleukin-1 beta | IL1B |
| Xiyangshen | MOL005344 | ginsenoside rh2 | Caspase-1 | CASP1 |
| Xiyangshen | MOL005344 | ginsenoside rh2 | Interferon gamma | IFNG |
| Xiyangshen | MOL005344 | ginsenoside rh2 | Pituitary adenylate cyclase-activating polypeptide | ADCYAP1 |
| Xiyangshen | MOL005344 | ginsenoside rh2 | Proteasome assembly chaperone 1 | PSMG1 |
| Xiyangshen | MOL005344 | ginsenoside rh2 | Dual specificity mitogen-activated protein kinase kinase 4 | MAP2K4 |
| Xiyangshen | MOL005344 | ginsenoside rh2 | Solute carrier family 2, facilitated glucose transporter member 4 | SLC2A4 |
| Xiyangshen | MOL006774 | stigmast-7-enol | Progesterone receptor | PGR |
| Xiyangshen | MOL006774 | stigmast-7-enol | Nuclear receptor coactivator 2 | NCOA2 |
| Xiyangshen | MOL006980 | papaverine | Muscarinic acetylcholine receptor M3 | CHRM3 |
| Xiyangshen | MOL006980 | papaverine | Potassium voltage-gated channel subfamily H member 2 | KCNH2 |
| Xiyangshen | MOL006980 | papaverine | Sodium channel protein type 5 subunit alpha | SCN5A |
| Xiyangshen | MOL006980 | papaverine | Coagulation factor X | F10 |
| Xiyangshen | MOL006980 | papaverine | Muscarinic acetylcholine receptor M5 | CHRM5 |
| Xiyangshen | MOL006980 | papaverine | Retinoic acid receptor RXR-alpha | RXRA |
| Xiyangshen | MOL006980 | papaverine | Alpha-1B adrenergic receptor | ADRA1B |
| Xiyangshen | MOL006980 | papaverine | Beta-2 adrenergic receptor | ADRB2 |
| Xiyangshen | MOL006980 | papaverine | Sodium-dependent serotonin transporter | SLC6A4 |
| Xiyangshen | MOL006980 | papaverine | Heat shock protein HSP 90-alpha | HSP90AA1 |
| Xiyangshen | MOL006980 | papaverine | cAMP-dependent protein kinase catalytic subunit alpha | PRKACA |
| Xiyangshen | MOL006980 | papaverine | Nuclear receptor coactivator 2 | NCOA2 |
| Xiyangshen | MOL006980 | papaverine | cAMP and cAMP-inhibited cGMP 3',5'-cyclic phosphodiesterase 10A | PDE10A |
| Xiyangshen | MOL006980 | papaverine | Tyrosyl-DNA phosphodiesterase 1 | TDP1 |
| Xiyangshen | MOL006980 | papaverine | Lipoprotein lipase | LPL |
| Xiyangshen | MOL006980 | papaverine | Amine oxidase [flavin-containing] A | MAOA |
| Xiyangshen | MOL006980 | papaverine | ADM | ADM |
| Xiyangshen | MOL008173 | daucosterol_qt | Progesterone receptor | PGR |
| Xiyangshen | MOL008173 | daucosterol_qt | Nuclear receptor coactivator 2 | NCOA2 |
| Xiyangshen | MOL008397 | Daturilin | Glucocorticoid receptor | NR3C1 |
| Yimucao | MOL001418 | galeopsin | Prothrombin | F2 |
| Yimucao | MOL001418 | galeopsin | Muscarinic acetylcholine receptor M1 | CHRM1 |
| Yimucao | MOL001418 | galeopsin | Beta-1 adrenergic receptor | ADRB1 |
| Yimucao | MOL001418 | galeopsin | Prostaglandin G/H synthase 2 | PTGS2 |
| Yimucao | MOL001418 | galeopsin | Alpha-2A adrenergic receptor | ADRA2A |
| Yimucao | MOL001418 | galeopsin | Retinoic acid receptor RXR-alpha | RXRA |
| Yimucao | MOL001418 | galeopsin | Acetylcholinesterase | ACHE |
| Yimucao | MOL001418 | galeopsin | Sodium-dependent noradrenaline transporter | SLC6A2 |
| Yimucao | MOL001418 | galeopsin | Muscarinic acetylcholine receptor M2 | CHRM2 |
| Yimucao | MOL001418 | galeopsin | Alpha-2B adrenergic receptor | ADRA2B |
| Yimucao | MOL001418 | galeopsin | Sodium-dependent dopamine transporter | SLC6A3 |
| Yimucao | MOL001418 | galeopsin | Beta-2 adrenergic receptor | ADRB2 |
| Yimucao | MOL001418 | galeopsin | Sodium-dependent serotonin transporter | SLC6A4 |
| Yimucao | MOL001418 | galeopsin | Amine oxidase [flavin-containing] B | MAOB |
| Yimucao | MOL001420 | ZINC04073977 | Progesterone receptor | PGR |
| Yimucao | MOL001420 | ZINC04073977 | Prostaglandin G/H synthase 2 | PTGS2 |
| Yimucao | MOL001421 | preleoheterin | Muscarinic acetylcholine receptor M3 | CHRM3 |
| Yimucao | MOL001421 | preleoheterin | Muscarinic acetylcholine receptor M1 | CHRM1 |
| Yimucao | MOL001421 | preleoheterin | Prostaglandin G/H synthase 2 | PTGS2 |
| Yimucao | MOL001421 | preleoheterin | cGMP-inhibited 3',5'-cyclic phosphodiesterase A | PDE3A |
| Yimucao | MOL001421 | preleoheterin | Sodium-dependent noradrenaline transporter | SLC6A2 |
| Yimucao | MOL001421 | preleoheterin | Alpha-1B adrenergic receptor | ADRA1B |
| Yimucao | MOL001421 | preleoheterin | Beta-2 adrenergic receptor | ADRB2 |
| Yimucao | MOL001421 | preleoheterin | Sodium-dependent serotonin transporter | SLC6A4 |
| Yimucao | MOL001421 | preleoheterin | Coagulation factor X | F10 |
| Yimucao | MOL001421 | preleoheterin | Heat shock protein HSP 90-alpha | HSP90AA1 |
| Yimucao | MOL001421 | preleoheterin | cAMP-dependent protein kinase catalytic subunit alpha | PRKACA |
| Yimucao | MOL001422 | iso-preleoheterin | Prostaglandin G/H synthase 1 | PTGS1 |
| Yimucao | MOL001422 | iso-preleoheterin | Muscarinic acetylcholine receptor M1 | CHRM1 |
| Yimucao | MOL001422 | iso-preleoheterin | Prostaglandin G/H synthase 2 | PTGS2 |
| Yimucao | MOL001422 | iso-preleoheterin | Retinoic acid receptor RXR-alpha | RXRA |
| Yimucao | MOL001422 | iso-preleoheterin | Sodium-dependent noradrenaline transporter | SLC6A2 |
| Yimucao | MOL001422 | iso-preleoheterin | Glutamate receptor 2 | GRIA2 |
| Yimucao | MOL000098 | quercetin | Prostaglandin G/H synthase 1 | PTGS1 |
| Yimucao | MOL000098 | quercetin | Androgen receptor | AR |
| Yimucao | MOL000098 | quercetin | Peroxisome proliferator-activated receptor gamma | PPARG |
| Yimucao | MOL000098 | quercetin | Prostaglandin G/H synthase 2 | PTGS2 |
| Yimucao | MOL000098 | quercetin | Heat shock protein HSP 90-alpha | HSP90AA1 |
| Yimucao | MOL000098 | quercetin | Nuclear receptor coactivator 2 | NCOA2 |
| Yimucao | MOL000098 | quercetin | Dipeptidyl peptidase 4 | DPP4 |
| Yimucao | MOL000098 | quercetin | Trypsin-1 | PRSS1 |
| Yimucao | MOL000098 | quercetin | DNA topoisomerase 2-alpha | TOP2A |
| Yimucao | MOL000098 | quercetin | Prothrombin | F2 |
| Yimucao | MOL000098 | quercetin | Potassium voltage-gated channel subfamily H member 2 | KCNH2 |
| Yimucao | MOL000098 | quercetin | Sodium channel protein type 5 subunit alpha | SCN5A |
| Yimucao | MOL000098 | quercetin | Coagulation factor X | F10 |
| Yimucao | MOL000098 | quercetin | Beta-2 adrenergic receptor | ADRB2 |
| Yimucao | MOL000098 | quercetin | Stromelysin-1 | MMP3 |
| Yimucao | MOL000098 | quercetin | cAMP-dependent protein kinase catalytic subunit alpha | PRKACA |
| Yimucao | MOL000098 | quercetin | Coagulation factor VII | F7 |
| Yimucao | MOL000098 | quercetin | Retinoic acid receptor RXR-alpha | RXRA |
| Yimucao | MOL000098 | quercetin | Acetylcholinesterase | ACHE |
| Yimucao | MOL000098 | quercetin | Amine oxidase [flavin-containing] B | MAOB |
| Yimucao | MOL000098 | quercetin | Transcription factor p65 | RELA |
| Yimucao | MOL000098 | quercetin | Epidermal growth factor receptor | EGFR |
| Yimucao | MOL000098 | quercetin | RAC-alpha serine/threonine-protein kinase | AKT1 |
| Yimucao | MOL000098 | quercetin | G1/S-specific cyclin-D1 | CCND1 |
| Yimucao | MOL000098 | quercetin | Apoptosis regulator Bcl-2 | BCL2 |
| Yimucao | MOL000098 | quercetin | Bcl-2-like protein 1 | BCL2L1 |
| Yimucao | MOL000098 | quercetin | Proto-oncogene c-Fos | FOS |
| Yimucao | MOL000098 | quercetin | Cyclin-dependent kinase inhibitor 1 | CDKN1A |
| Yimucao | MOL000098 | quercetin | Eukaryotic translation initiation factor 6 | EIF6 |
| Yimucao | MOL000098 | quercetin | Apoptosis regulator BAX | BAX |
| Yimucao | MOL000098 | quercetin | Caspase-9 | CASP9 |
| Yimucao | MOL000098 | quercetin | Urokinase-type plasminogen activator | PLAU |
| Yimucao | MOL000098 | quercetin | 72 kDa type IV collagenase | MMP2 |
| Yimucao | MOL000098 | quercetin | Matrix metalloproteinase-9 | MMP9 |
| Yimucao | MOL000098 | quercetin | Mitogen-activated protein kinase 1 | MAPK1 |
| Yimucao | MOL000098 | quercetin | Interleukin-10 | IL10 |
| Yimucao | MOL000098 | quercetin | Retinoblastoma-associated protein | RB1 |
| Yimucao | MOL000098 | quercetin | Tumor necrosis factor | TNF |
| Yimucao | MOL000098 | quercetin | Transcription factor AP-1 | JUN |
| Yimucao | MOL000098 | quercetin | Interleukin-6 | IL6 |
| Yimucao | MOL000098 | quercetin | Activator of 90 kDa heat shock protein ATPase homolog 1 | AHSA1 |
| Yimucao | MOL000098 | quercetin | Caspase-3 | CASP3 |
| Yimucao | MOL000098 | quercetin | Cellular tumor antigen p53 | TP53 |
| Yimucao | MOL000098 | quercetin | ETS domain-containing protein Elk-1 | ELK1 |
| Yimucao | MOL000098 | quercetin | NF-kappa-B inhibitor alpha | NFKBIA |
| Yimucao | MOL000098 | quercetin | Ornithine decarboxylase | ODC1 |
| Yimucao | MOL000098 | quercetin | Caspase-8 | CASP8 |
| Yimucao | MOL000098 | quercetin | DNA topoisomerase 1 | TOP1 |
| Yimucao | MOL000098 | quercetin | RAF proto-oncogene serine/threonine-protein kinase | RAF1 |
| Yimucao | MOL000098 | quercetin | Superoxide dismutase [Cu-Zn] | SOD1 |
| Yimucao | MOL000098 | quercetin | Protein kinase C alpha type | PRKCA |
| Yimucao | MOL000098 | quercetin | Interstitial collagenase | MMP1 |
| Yimucao | MOL000098 | quercetin | Hypoxia-inducible factor 1-alpha | HIF1A |
| Yimucao | MOL000098 | quercetin | Signal transducer and activator of transcription 1-alpha/beta | STAT1 |
| Yimucao | MOL000098 | quercetin | Protein CBFA2T1 | RUNX1T1 |
| Yimucao | MOL000098 | quercetin | Receptor tyrosine-protein kinase erbB-2 | ERBB2 |
| Yimucao | MOL000098 | quercetin | Peroxisome proliferator-activated receptor gamma | PPARG |
| Yimucao | MOL000098 | quercetin | Acetyl-CoA carboxylase 1 | ACACA |
| Yimucao | MOL000098 | quercetin | Heme oxygenase 1 | HMOX1 |
| Yimucao | MOL000098 | quercetin | Cytochrome P450 3A4 | CYP3A4 |
| Yimucao | MOL000098 | quercetin | Caveolin-1 | CAV1 |
| Yimucao | MOL000098 | quercetin | Myc proto-oncogene protein | MYC |
| Yimucao | MOL000098 | quercetin | Tissue factor | F3 |
| Yimucao | MOL000098 | quercetin | Gap junction alpha-1 protein | GJA1 |
| Yimucao | MOL000098 | quercetin | Cytochrome P450 1A1 | CYP1A1 |
| Yimucao | MOL000098 | quercetin | Intercellular adhesion molecule 1 | ICAM1 |
| Yimucao | MOL000098 | quercetin | Interleukin-1 beta | IL1B |
| Yimucao | MOL000098 | quercetin | E-selectin | SELE |
| Yimucao | MOL000098 | quercetin | Vascular cell adhesion protein 1 | VCAM1 |
| Yimucao | MOL000098 | quercetin | Interleukin-8 | CXCL8 |
| Yimucao | MOL000098 | quercetin | Protein kinase C beta type | PRKCB |
| Yimucao | MOL000098 | quercetin | Baculoviral IAP repeat-containing protein 5 | BIRC5 |
| Yimucao | MOL000098 | quercetin | Dual oxidase 2 | DUOX2 |
| Yimucao | MOL000098 | quercetin | Nitric oxide synthase, endothelial | NOS3 |
| Yimucao | MOL000098 | quercetin | Heat shock protein beta-1 | HSPB1 |
| Yimucao | MOL000098 | quercetin | Maltase-glucoamylase, intestinal | MGAM |
| Yimucao | MOL000098 | quercetin | Interleukin-2 | IL2 |
| Yimucao | MOL000098 | quercetin | Nuclear receptor subfamily 1 group I member 2 | NR1I2 |
| Yimucao | MOL000098 | quercetin | Cytochrome P450 1B1 | CYP1B1 |
| Yimucao | MOL000098 | quercetin | G2/mitotic-specific cyclin-B1 | CCNB1 |
| Yimucao | MOL000098 | quercetin | Tissue-type plasminogen activator | PLAT |
| Yimucao | MOL000098 | quercetin | Thrombomodulin | THBD |
| Yimucao | MOL000098 | quercetin | Plasminogen activator inhibitor 1 | SERPINE1 |
| Yimucao | MOL000098 | quercetin | Interferon gamma | IFNG |
| Yimucao | MOL000098 | quercetin | Arachidonate 5-lipoxygenase | ALOX5 |
| Yimucao | MOL000098 | quercetin | Interleukin-1 alpha | IL1A |
| Yimucao | MOL000098 | quercetin | Myeloperoxidase | MPO |
| Yimucao | MOL000098 | quercetin | DNA topoisomerase 2-alpha | TOP2A |
| Yimucao | MOL000098 | quercetin | Neutrophil cytosol factor 1 | NCF1 |
| Yimucao | MOL000098 | quercetin | Hyaluronan synthase 2 | HAS2 |
| Yimucao | MOL000098 | quercetin | Nuclear factor erythroid 2-related factor 2 | NFE2L2 |
| Yimucao | MOL000098 | quercetin | NAD(P)H dehydrogenase [quinone] 1 | NQO1 |
| Yimucao | MOL000098 | quercetin | Poly [ADP-ribose] polymerase 1 | PARP1 |
| Yimucao | MOL000098 | quercetin | Aryl hydrocarbon receptor | AHR |
| Yimucao | MOL000098 | quercetin | 26S proteasome non-ATPase regulatory subunit 3 | PSMD3 |
| Yimucao | MOL000098 | quercetin | Solute carrier family 2, facilitated glucose transporter member 4 | SLC2A4 |
| Yimucao | MOL000098 | quercetin | Collagen alpha-1(III) chain | COL3A1 |
| Yimucao | MOL000098 | quercetin | C-X-C motif chemokine 11 | CXCL11 |
| Yimucao | MOL000098 | quercetin | C-X-C motif chemokine 2 | CXCL2 |
| Yimucao | MOL000098 | quercetin | DDB1- and CUL4-associated factor 5 | DCAF5 |
| Yimucao | MOL000098 | quercetin | Nuclear receptor subfamily 1 group I member 3 | NR1I3 |
| Yimucao | MOL000098 | quercetin | Serine/threonine-protein kinase Chk2 | CHEK2 |
| Yimucao | MOL000098 | quercetin | Insulin receptor | INSR |
| Yimucao | MOL000098 | quercetin | Claudin-4 | CLDN4 |
| Yimucao | MOL000098 | quercetin | Peroxisome proliferator-activated receptor alpha | PPARA |
| Yimucao | MOL000098 | quercetin | Peroxisome proliferator-activated receptor delta | PPARD |
| Yimucao | MOL000098 | quercetin | Heat shock factor protein 1 | HSF1 |
| Yimucao | MOL000098 | quercetin | C-reactive protein | CRP |
| Yimucao | MOL000098 | quercetin | C-X-C motif chemokine 10 | CXCL10 |
| Yimucao | MOL000098 | quercetin | Inhibitor of nuclear factor kappa-B kinase subunit alpha | CHUK |
| Yimucao | MOL000098 | quercetin | Osteopontin | SPP1 |
| Yimucao | MOL000098 | quercetin | Runt-related transcription factor 2 | RUNX2 |
| Yimucao | MOL000098 | quercetin | Ras association domain-containing protein 1 | RASSF1 |
| Yimucao | MOL000098 | quercetin | Transcription factor E2F1 | E2F1 |
| Yimucao | MOL000098 | quercetin | Transcription factor E2F2 | E2F2 |
| Yimucao | MOL000098 | quercetin | Prostatic acid phosphatase | ACP3 |
| Yimucao | MOL000098 | quercetin | Cathepsin D | CTSD |
| Yimucao | MOL000098 | quercetin | Insulin-like growth factor-binding protein 3 | IGFBP3 |
| Yimucao | MOL000098 | quercetin | Insulin-like growth factor II | IGF2 |
| Yimucao | MOL000098 | quercetin | CD40 ligand | CD40LG |
| Yimucao | MOL000098 | quercetin | Interferon regulatory factor 1 | IRF1 |
| Yimucao | MOL000098 | quercetin | Receptor tyrosine-protein kinase erbB-3 | ERBB3 |
| Yimucao | MOL000098 | quercetin | Serum paraoxonase/arylesterase 1 | PON1 |
| Yimucao | MOL000098 | quercetin | Type I iodothyronine deiodinase | DIO1 |
| Yimucao | MOL000098 | quercetin | Procollagen C-endopeptidase enhancer 1 | PCOLCE |
| Yimucao | MOL000098 | quercetin | Puromycin-sensitive aminopeptidase | NPEPPS |
| Yimucao | MOL000098 | quercetin | Hexokinase-2 | HK2 |
| Yimucao | MOL000098 | quercetin | Ras GTPase-activating protein 1 | RASA1 |
| Yimucao | MOL000098 | quercetin | Glutathione S-transferase Mu 1 | GSTM1 |
| Yimucao | MOL000098 | quercetin | Glutathione S-transferase Mu 2 | GSTM2 |
| Yimucao | MOL001439 | arachidonic acid | Prostaglandin G/H synthase 1 | PTGS1 |
| Yimucao | MOL001439 | arachidonic acid | Prostaglandin G/H synthase 2 | PTGS2 |
| Yimucao | MOL001439 | arachidonic acid | Retinoic acid receptor RXR-alpha | RXRA |
| Yimucao | MOL001439 | arachidonic acid | Transient receptor potential cation channel subfamily V member 1 | TRPV1 |
| Yimucao | MOL001439 | arachidonic acid | Retinoic acid receptor RXR-gamma | RXRG |
| Yimucao | MOL001439 | arachidonic acid | Sodium-dependent noradrenaline transporter | SLC6A2 |
| Yimucao | MOL001439 | arachidonic acid | Transcription factor p65 | RELA |
| Yimucao | MOL001439 | arachidonic acid | G1/S-specific cyclin-D1 | CCND1 |
| Yimucao | MOL001439 | arachidonic acid | Mitogen-activated protein kinase 1 | MAPK1 |
| Yimucao | MOL001439 | arachidonic acid | Caspase-3 | CASP3 |
| Yimucao | MOL001439 | arachidonic acid | Peroxisome proliferator-activated receptor gamma | PPARG |
| Yimucao | MOL001439 | arachidonic acid | Glucose-6-phosphate 1-dehydrogenase | G6PD |
| Yimucao | MOL001439 | arachidonic acid | Protein kinase C beta type | PRKCB |
| Yimucao | MOL001439 | arachidonic acid | Platelet endothelial cell adhesion molecule | PECAM1 |
| Yimucao | MOL001439 | arachidonic acid | Nitric oxide synthase, endothelial | NOS3 |
| Yimucao | MOL001439 | arachidonic acid | Arachidonate 5-lipoxygenase | ALOX5 |
| Yimucao | MOL001439 | arachidonic acid | Cytosolic phospholipase A2 | PLA2G4A |
| Yimucao | MOL001439 | arachidonic acid | P-selectin | SELP |
| Yimucao | MOL001439 | arachidonic acid | Prostaglandin E synthase | PTGES |
| Yimucao | MOL001439 | arachidonic acid | Beta-galactosidase | GLB1 |
| Yimucao | MOL001439 | arachidonic acid | Aldehyde dehydrogenase, mitochondrial | ALDH2 |
| Yimucao | MOL001439 | arachidonic acid | Mitochondrial uncoupling protein 2 | UCP2 |
| Yimucao | MOL001439 | arachidonic acid | Complement C1r subcomponent | C1R |
| Yimucao | MOL001439 | arachidonic acid | Cholesteryl ester transfer protein | CETP |
| Yimucao | MOL001439 | arachidonic acid | Multidrug resistance-associated protein 4 | ABCC4 |
| Yimucao | MOL001439 | arachidonic acid | Potassium channel subfamily K member 10 | KCNK10 |
| Yimucao | MOL001439 | arachidonic acid | Tumor necrosis factor receptor superfamily member 1B | TNFRSF1B |
| Yimucao | MOL001439 | arachidonic acid | Prostaglandin E synthase 2 | PTGES2 |
| Yimucao | MOL001439 | arachidonic acid | Potassium channel subfamily K member 2 | KCNK2 |
| Yimucao | MOL001439 | arachidonic acid | Collagen alpha-2(I) chain | COL1A2 |
| Yimucao | MOL000354 | isorhamnetin | Nitric oxide synthase, inducible | NOS2 |
| Yimucao | MOL000354 | isorhamnetin | Prostaglandin G/H synthase 1 | PTGS1 |
| Yimucao | MOL000354 | isorhamnetin | Estrogen receptor | ESR1 |
| Yimucao | MOL000354 | isorhamnetin | Androgen receptor | AR |
| Yimucao | MOL000354 | isorhamnetin | Peroxisome proliferator-activated receptor gamma | PPARG |
| Yimucao | MOL000354 | isorhamnetin | Prostaglandin G/H synthase 2 | PTGS2 |
| Yimucao | MOL000354 | isorhamnetin | Tyrosine-protein phosphatase non-receptor type 1 | PTPN1 |
| Yimucao | MOL000354 | isorhamnetin | Estrogen receptor beta | ESR2 |
| Yimucao | MOL000354 | isorhamnetin | Dipeptidyl peptidase 4 | DPP4 |
| Yimucao | MOL000354 | isorhamnetin | Mitogen-activated protein kinase 14 | MAPK14 |
| Yimucao | MOL000354 | isorhamnetin | Glycogen synthase kinase-3 beta | GSK3B |
| Yimucao | MOL000354 | isorhamnetin | Heat shock protein HSP 90-alpha | HSP90AA1 |
| Yimucao | MOL000354 | isorhamnetin | cAMP-dependent protein kinase catalytic subunit alpha | PRKACA |
| Yimucao | MOL000354 | isorhamnetin | Trypsin-1 | PRSS1 |
| Yimucao | MOL000354 | isorhamnetin | Cyclin-A2 | CCNA2 |
| Yimucao | MOL000354 | isorhamnetin | Nuclear receptor coactivator 2 | NCOA2 |
| Yimucao | MOL000354 | isorhamnetin | Glycogen phosphorylase, muscle form | PYGM |
| Yimucao | MOL000354 | isorhamnetin | Peroxisome proliferator-activated receptor delta | PPARD |
| Yimucao | MOL000354 | isorhamnetin | Serine/threonine-protein kinase Chk1 | CHEK1 |
| Yimucao | MOL000354 | isorhamnetin | Nuclear receptor coactivator 1 | NCOA1 |
| Yimucao | MOL000354 | isorhamnetin | Coagulation factor VII | F7 |
| Yimucao | MOL000354 | isorhamnetin | Prothrombin | F2 |
| Yimucao | MOL000354 | isorhamnetin | Acetylcholinesterase | ACHE |
| Yimucao | MOL000354 | isorhamnetin | Amine oxidase [flavin-containing] B | MAOB |
| Yimucao | MOL000354 | isorhamnetin | Glutamate receptor 2 | GRIA2 |
| Yimucao | MOL000354 | isorhamnetin | Transcription factor p65 | RELA |
| Yimucao | MOL000354 | isorhamnetin | Neutrophil cytosol factor 1 | NCF1 |
| Yimucao | MOL000354 | isorhamnetin | Oxidized low-density lipoprotein receptor 1 | OLR1 |
| Yimucao | MOL000422 | kaempferol | Nitric oxide synthase, inducible | NOS2 |
| Yimucao | MOL000422 | kaempferol | Prostaglandin G/H synthase 1 | PTGS1 |
| Yimucao | MOL000422 | kaempferol | Androgen receptor | AR |
| Yimucao | MOL000422 | kaempferol | Peroxisome proliferator-activated receptor gamma | PPARG |
| Yimucao | MOL000422 | kaempferol | Prostaglandin G/H synthase 2 | PTGS2 |
| Yimucao | MOL000422 | kaempferol | Heat shock protein HSP 90-alpha | HSP90AA1 |
| Yimucao | MOL000422 | kaempferol | cAMP-dependent protein kinase catalytic subunit alpha | PRKACA |
| Yimucao | MOL000422 | kaempferol | Nuclear receptor coactivator 2 | NCOA2 |
| Yimucao | MOL000422 | kaempferol | Dipeptidyl peptidase 4 | DPP4 |
| Yimucao | MOL000422 | kaempferol | Trypsin-1 | PRSS1 |
| Yimucao | MOL000422 | kaempferol | Progesterone receptor | PGR |
| Yimucao | MOL000422 | kaempferol | Prothrombin | F2 |
| Yimucao | MOL000422 | kaempferol | Muscarinic acetylcholine receptor M1 | CHRM1 |
| Yimucao | MOL000422 | kaempferol | Acetylcholinesterase | ACHE |
| Yimucao | MOL000422 | kaempferol | Sodium-dependent noradrenaline transporter | SLC6A2 |
| Yimucao | MOL000422 | kaempferol | Muscarinic acetylcholine receptor M2 | CHRM2 |
| Yimucao | MOL000422 | kaempferol | Alpha-1B adrenergic receptor | ADRA1B |
| Yimucao | MOL000422 | kaempferol | DNA topoisomerase 2-alpha | TOP2A |
| Yimucao | MOL000422 | kaempferol | Coagulation factor VII | F7 |
| Yimucao | MOL000422 | kaempferol | Transcription factor p65 | RELA |
| Yimucao | MOL000422 | kaempferol | Inhibitor of nuclear factor kappa-B kinase subunit beta | IKBKB |
| Yimucao | MOL000422 | kaempferol | RAC-alpha serine/threonine-protein kinase | AKT1 |
| Yimucao | MOL000422 | kaempferol | Apoptosis regulator Bcl-2 | BCL2 |
| Yimucao | MOL000422 | kaempferol | Apoptosis regulator BAX | BAX |
| Yimucao | MOL000422 | kaempferol | Tumor necrosis factor | TNF |
| Yimucao | MOL000422 | kaempferol | Transcription factor AP-1 | JUN |
| Yimucao | MOL000422 | kaempferol | Activator of 90 kDa heat shock protein ATPase homolog 1 | AHSA1 |
| Yimucao | MOL000422 | kaempferol | Caspase-3 | CASP3 |
| Yimucao | MOL000422 | kaempferol | Mitogen-activated protein kinase 8 | MAPK8 |
| Yimucao | MOL000422 | kaempferol | Interstitial collagenase | MMP1 |
| Yimucao | MOL000422 | kaempferol | Signal transducer and activator of transcription 1-alpha/beta | STAT1 |
| Yimucao | MOL000422 | kaempferol | Peroxisome proliferator-activated receptor gamma | PPARG |
| Yimucao | MOL000422 | kaempferol | Heme oxygenase 1 | HMOX1 |
| Yimucao | MOL000422 | kaempferol | Cytochrome P450 3A4 | CYP3A4 |
| Yimucao | MOL000422 | kaempferol | Cytochrome P450 1A1 | CYP1A1 |
| Yimucao | MOL000422 | kaempferol | Intercellular adhesion molecule 1 | ICAM1 |
| Yimucao | MOL000422 | kaempferol | E-selectin | SELE |
| Yimucao | MOL000422 | kaempferol | Vascular cell adhesion protein 1 | VCAM1 |
| Yimucao | MOL000422 | kaempferol | Nuclear receptor subfamily 1 group I member 2 | NR1I2 |
| Yimucao | MOL000422 | kaempferol | Cytochrome P450 1B1 | CYP1B1 |
| Yimucao | MOL000422 | kaempferol | Arachidonate 5-lipoxygenase | ALOX5 |
| Yimucao | MOL000422 | kaempferol | Hyaluronan synthase 2 | HAS2 |
| Yimucao | MOL000422 | kaempferol | Aryl hydrocarbon receptor | AHR |
| Yimucao | MOL000422 | kaempferol | 26S proteasome non-ATPase regulatory subunit 3 | PSMD3 |
| Yimucao | MOL000422 | kaempferol | Solute carrier family 2, facilitated glucose transporter member 4 | SLC2A4 |
| Yimucao | MOL000422 | kaempferol | Nuclear receptor subfamily 1 group I member 3 | NR1I3 |
| Yimucao | MOL000422 | kaempferol | Insulin receptor | INSR |
| Yimucao | MOL000422 | kaempferol | Type I iodothyronine deiodinase | DIO1 |
| Yimucao | MOL000422 | kaempferol | Serine/threonine-protein phosphatase 2B catalytic subunit alpha isoform | PPP3CA |
| Yimucao | MOL000422 | kaempferol | Glutathione S-transferase Mu 1 | GSTM1 |
| Yimucao | MOL000422 | kaempferol | Glutathione S-transferase Mu 2 | GSTM2 |
| Yimucao | MOL000422 | kaempferol | Aldo-keto reductase family 1 member C3 | AKR1C3 |
| Yimucao | MOL000422 | kaempferol | Antileukoproteinase | SLPI |
| Zexie | MOL000359 | sitosterol | Progesterone receptor | PGR |
| Zexie | MOL000359 | sitosterol | Nuclear receptor coactivator 2 | NCOA2 |
| Zexie | MOL000359 | sitosterol | Mineralocorticoid receptor | NR3C2 |
| Zexie | MOL000831 | Alisol B monoacetate | Glucocorticoid receptor | NR3C1 |
| Zexie | MOL000849 | 16β-methoxyalisol B monoacetate | Glucocorticoid receptor | NR3C1 |
| Zexie | MOL000853 | alisol B | Mineralocorticoid receptor | NR3C2 |
| Zexie | MOL000856 | alisol C monoacetate | Glucocorticoid receptor | NR3C1 |
| Zexie | MOL002464 | 1-Monolinolein | Prostaglandin G/H synthase 1 | PTGS1 |
| Zexie | MOL000862 | [(1S,3R)-1-[(2R)-3,3-dimethyloxiran-2-yl]-3-[(5R,8S,9S,10S,11S,14R)-11-hydroxy-4,4,8,10,14-pentamethyl-3-oxo-1,2,5,6,7,9,11,12,15,16-decahydrocyclopenta[a]phenanthren-17-yl]butyl] acetate | Glucocorticoid receptor | NR3C1 |

**Table S4. 6Machine learning models predicting the target protein of the active ingredient**

| **Molecule** | **Target** | **Common name** | **Uniprot ID** | **Target Class** | **Probability** |
| --- | --- | --- | --- | --- | --- |
| acacetin | Cytochrome P450 1B1 | CYP1B1 | Q16678 | Cytochrome P450 | 1 |
| acacetin | Cytochrome P450 19A1 | CYP19A1 | P11511 | Cytochrome P450 | 0.353074081 |
| acacetin | Carbonic anhydrase VII | CA7 | P43166 | Lyase | 0.254289912 |
| acacetin | Carbonic anhydrase XII | CA12 | O43570 | Lyase | 0.254289912 |
| acacetin | Carbonic anhydrase IV | CA4 | P22748 | Lyase | 0.254289912 |
| acacetin | Carbonyl reductase [NADPH] 1 | CBR1 | P16152 | Enzyme | 0.254289912 |
| acacetin | Multidrug resistance-associated protein 1 | ABCC1 | P33527 | Primary active transporter | 0.237885168 |
| acacetin | Estrogen receptor beta | ESR2 | Q92731 | Nuclear receptor | 0.213125923 |
| acacetin | P-glycoprotein 1 | ABCB1 | P08183 | Primary active transporter | 0.213125923 |
| acacetin | NADPH oxidase 4 | NOX4 | Q9NPH5 | Enzyme | 0.188420386 |
| acacetin | Tankyrase-2 | TNKS2 | Q9H2K2 | Enzyme | 0.180252494 |
| acacetin | Tankyrase-1 | TNKS | O95271 | Enzyme | 0.180252494 |
| acacetin | Cyclin-dependent kinase 5/CDK5 activator 1 | CDK5R1 CDK5 | Q15078 Q00535 | Kinase | 0.171978589 |
| acacetin | Xanthine dehydrogenase | XDH | P47989 | Oxidoreductase | 0.171978589 |
| acacetin | Cyclin-dependent kinase 1/cyclin B | CCNB3 CDK1 CCNB1 CCNB2 | Q8WWL7 P06493 P14635 O95067 | Other cytosolic protein | 0.171978589 |
| acacetin | Acetylcholinesterase | ACHE | P22303 | Hydrolase | 0.171978589 |
| acacetin | Cyclin-dependent kinase 6 | CDK6 | Q00534 | Kinase | 0.171978589 |
| acacetin | Estrogen receptor alpha | ESR1 | P03372 | Nuclear receptor | 0.171978589 |
| acacetin | Aldose reductase (by homology) | AKR1B1 | P15121 | Enzyme | 0.163737226 |
| acacetin | Tyrosine-protein kinase receptor FLT3 | FLT3 | P36888 | Kinase | 0.163737226 |
| acacetin | Estradiol 17-beta-dehydrogenase 1 | HSD17B1 | P14061 | Enzyme | 0.163737226 |
| acacetin | ATP-binding cassette sub-family G member 2 | ABCG2 | Q9UNQ0 | Primary active transporter | 0.163737226 |
| acacetin | Monoamine oxidase A | MAOA | P21397 | Oxidoreductase | 0.155528102 |
| acacetin | Adenosine A1 receptor (by homology) | ADORA1 | P30542 | Family A G protein-coupled receptor | 0.155528102 |
| acacetin | Adenosine A2a receptor | ADORA2A | P29274 | Family A G protein-coupled receptor | 0.155528102 |
| acacetin | Tyrosine-protein kinase SYK | SYK | P43405 | Kinase | 0.155528102 |
| acacetin | Glycogen synthase kinase-3 beta | GSK3B | P49841 | Kinase | 0.155528102 |
| acacetin | Transthyretin | TTR | P02766 | Secreted protein | 0.155528102 |
| acacetin | Aldo-keto reductase family 1 member B10 | AKR1B10 | O60218 | Enzyme | 0.155528102 |
| acacetin | Stem cell growth factor receptor | KIT | P10721 | Kinase | 0.147256737 |
| acacetin | Delta opioid receptor | OPRD1 | P41143 | Family A G protein-coupled receptor | 0.147256737 |
| acacetin | Tyrosine-protein kinase LCK | LCK | P06239 | Kinase | 0.147256737 |
| acacetin | Estradiol 17-beta-dehydrogenase 2 | HSD17B2 | P37059 | Enzyme | 0.147256737 |
| acacetin | Arachidonate 15-lipoxygenase | ALOX15 | P16050 | Enzyme | 0.139061947 |
| acacetin | Arachidonate 12-lipoxygenase | ALOX12 | P18054 | Enzyme | 0.139061947 |
| acacetin | Cyclooxygenase-2 | PTGS2 | P35354 | Oxidoreductase | 0.139061947 |
| acacetin | Casein kinase II alpha | CSNK2A1 | P68400 | Kinase | 0.139061947 |
| acacetin | Cystic fibrosis transmembrane conductance regulator | CFTR | P13569 | Other ion channel | 0.139061947 |
| acacetin | Serine/threonine-protein kinase PIM1 | PIM1 | P11309 | Kinase | 0.130791955 |
| acacetin | Carbonic anhydrase II | CA2 | P00918 | Lyase | 0.130791955 |
| acacetin | Induced myeloid leukemia cell differentiation protein Mcl-1 | MCL1 | Q07820 | Other cytosolic protein | 0.130791955 |
| acacetin | Receptor-type tyrosine-protein phosphatase S | PTPRS | Q13332 | Phosphatase | 0.130791955 |
| acacetin | Plasminogen | PLG | P00747 | Protease | 0.122581769 |
| acacetin | Arginase-1 (by homology) | ARG1 | P05089 | Enzyme | 0.122581769 |
| acacetin | Arachidonate 5-lipoxygenase | ALOX5 | P09917 | Oxidoreductase | 0.114337559 |
| acacetin | Carbonic anhydrase I | CA1 | P00915 | Lyase | 0.114337559 |
| acacetin | Carbonic anhydrase IX | CA9 | Q16790 | Lyase | 0.114337559 |
| acacetin | G protein-coupled receptor kinase 6 | GRK6 | P43250 | Kinase | 0.114337559 |
| acacetin | Beta amyloid A4 protein | APP | P05067 | Membrane receptor | 0.114337559 |
| acacetin | Glyoxalase I | GLO1 | Q04760 | Enzyme | 0.114337559 |
| acacetin | Poly [ADP-ribose] polymerase-1 | PARP1 | P09874 | Enzyme | 0.114337559 |
| acacetin | Matrix metalloproteinase 9 | MMP9 | P14780 | Protease | 0.114337559 |
| acacetin | Matrix metalloproteinase 2 | MMP2 | P08253 | Protease | 0.114337559 |
| acacetin | Matrix metalloproteinase 12 | MMP12 | P39900 | Protease | 0.114337559 |
| acacetin | Lymphocyte differentiation antigen CD38 | CD38 | P28907 | Enzyme | 0.114337559 |
| acacetin | DNA topoisomerase I (by homology) | TOP1 | P11387 | Isomerase | 0.114337559 |
| acacetin | AMY1C | AMY1A | P04745 | Enzyme | 0.106099949 |
| acacetin | Phospholipase A2 group IIA | PLA2G2A | P14555 | Enzyme | 0.106099949 |
| acacetin | NEDD8-activating enzyme E1 regulatory subunit | NAE1 | Q13564 | Unclassified protein | 0.106099949 |
| acacetin | Cyclin-dependent kinase 1 | CDK1 | P06493 | Kinase | 0.106099949 |
| acacetin | Lysine-specific demethylase 4D-like | KDM4E | B2RXH2 | Eraser | 0.106099949 |
| acacetin | Tyrosinase | TYR | P14679 | Oxidoreductase | 0.106099949 |
| acacetin | Aryl hydrocarbon receptor | AHR | P35869 | Transcription factor | 0.106099949 |
| acacetin | Estrogen-related receptor alpha | ESRRA | P11474 | Nuclear receptor | 0.106099949 |
| acacetin | Telomerase reverse transcriptase | TERT | O14746 | Enzyme | 0.106099949 |
| acacetin | Adenosine A3 receptor | ADORA3 | P0DMS8 | Family A G protein-coupled receptor | 0.106099949 |
| acacetin | Monoamine oxidase B | MAOB | P27338 | Oxidoreductase | 0.097874534 |
| acacetin | 6-phosphofructo-2-kinase/fructose-2,6-bisphosphatase 3 | PFKFB3 | Q16875 | Enzyme | 0.097874534 |
| acacetin | Solute carrier family 22 member 12 | SLC22A12 | Q96S37 | Electrochemical transporter | 0.097874534 |
| acacetin | Androgen Receptor | AR | P10275 | Nuclear receptor | 0.097874534 |
| acacetin | Beta-galactoside alpha-2,6-sialyltransferase 1 | ST6GAL1 | P15907 | Transferase | 0.097874534 |
| acacetin | Sigma opioid receptor | SIGMAR1 | Q99720 | Membrane receptor | 0.097874534 |
| acacetin | Insulin-like growth factor I receptor | IGF1R | P08069 | Kinase | 0.097874534 |
| acacetin | Epidermal growth factor receptor erbB1 | EGFR | P00533 | Kinase | 0.097874534 |
| acacetin | Nitric oxide synthase, inducible (by homology) | NOS2 | P35228 | Enzyme | 0.097874534 |
| acacetin | Beta-secretase 1 | BACE1 | P56817 | Protease | 0.097874534 |
| acacetin | Calmodulin | CALM1 | P62158 | Unclassified protein | 0.097874534 |
| acacetin | Cytochrome P450 1A1 | CYP1A1 | P04798 | Cytochrome P450 | 0.097874534 |
| acacetin | Cytochrome P450 1A2 | CYP1A2 | P05177 | Cytochrome P450 | 0.097874534 |
| acacetin | Thrombin | F2 | P00734 | Protease | 0.097874534 |
| acacetin | Death-associated protein kinase 1 | DAPK1 | P53355 | Kinase | 0.097874534 |
| acacetin | Cyclin-dependent kinase 2 | CDK2 | P24941 | Kinase | 0.097874534 |
| acacetin | G-protein coupled receptor 35 | GPR35 | Q9HC97 | Family A G protein-coupled receptor | 0.097874534 |
| acacetin | DNA-3-methyladenine glycosylase | MPG | P29372 | Enzyme | 0.097874534 |
| acacetin | Vasopressin V2 receptor | AVPR2 | P30518 | Family A G protein-coupled receptor | 0.097874534 |
| acacetin | Serine/threonine-protein kinase Aurora-B | AURKB | Q96GD4 | Kinase | 0.097874534 |
| acacetin | Dopamine D4 receptor | DRD4 | P21917 | Family A G protein-coupled receptor | 0.097874534 |
| acacetin | Myeloperoxidase | MPO | P05164 | Enzyme | 0.097874534 |
| acacetin | PI3-kinase p85-alpha subunit | PIK3R1 | P27986 | Enzyme | 0.097874534 |
| acacetin | Liver glycogen phosphorylase | PYGL | P06737 | Enzyme | 0.097874534 |
| acacetin | Tyrosine-protein kinase SRC | SRC | P12931 | Kinase | 0.097874534 |
| acacetin | Focal adhesion kinase 1 | PTK2 | Q05397 | Kinase | 0.097874534 |
| acacetin | Vascular endothelial growth factor receptor 2 | KDR | P35968 | Kinase | 0.097874534 |
| acacetin | Matrix metalloproteinase 13 | MMP13 | P45452 | Protease | 0.097874534 |
| acacetin | Matrix metalloproteinase 3 | MMP3 | P08254 | Protease | 0.097874534 |
| acacetin | Carbonic anhydrase III | CA3 | P07451 | Lyase | 0.097874534 |
| acacetin | Serine/threonine-protein kinase PLK1 | PLK1 | P53350 | Kinase | 0.097874534 |
| acacetin | Carbonic anhydrase VI | CA6 | P23280 | Lyase | 0.097874534 |
| acacetin | Protein kinase N1 | PKN1 | Q16512 | Kinase | 0.097874534 |
| acacetin | Carbonic anhydrase XIV | CA14 | Q9ULX7 | Lyase | 0.097874534 |
| arachidonic acid | Fatty acid binding protein adipocyte | FABP4 | P15090 | Fatty acid binding protein family | 0.745556243 |
| arachidonic acid | Peroxisome proliferator-activated receptor gamma | PPARG | P37231 | Nuclear receptor | 0.745556243 |
| arachidonic acid | Peroxisome proliferator-activated receptor alpha | PPARA | Q07869 | Nuclear receptor | 0.745556243 |
| arachidonic acid | Peroxisome proliferator-activated receptor delta | PPARD | Q03181 | Nuclear receptor | 0.745556243 |
| arachidonic acid | Arachidonate 5-lipoxygenase | ALOX5 | P09917 | Oxidoreductase | 0.316875924 |
| arachidonic acid | Free fatty acid receptor 1 | FFAR1 | O14842 | Family A G protein-coupled receptor | 0.253686854 |
| arachidonic acid | Fatty acid binding protein muscle | FABP3 | P05413 | Fatty acid binding protein family | 0.214178827 |
| arachidonic acid | Cyclooxygenase-1 | PTGS1 | P23219 | Oxidoreductase | 0.15098181 |
| arachidonic acid | Cannabinoid receptor 1 | CNR1 | P21554 | Family A G protein-coupled receptor | 0.12730257 |
| arachidonic acid | Anandamide amidohydrolase | FAAH | O00519 | Enzyme | 0.12730257 |
| arachidonic acid | Telomerase reverse transcriptase | TERT | O14746 | Enzyme | 0.12730257 |
| arachidonic acid | Fatty acid binding protein epidermal | FABP5 | Q01469 | Fatty acid binding protein family | 0.12730257 |
| arachidonic acid | Fatty acid-binding protein, liver | FABP1 | P07148 | Fatty acid binding protein family | 0.12730257 |
| arachidonic acid | DNA topoisomerase I | TOP1 | P11387 | Isomerase | 0.119403562 |
| arachidonic acid | Prostaglandin E synthase | PTGES | O14684 | Enzyme | 0.119403562 |
| arachidonic acid | Acyl-CoA desaturase | SCD | O00767 | Enzyme | 0.111501865 |
| arachidonic acid | Prostanoid EP2 receptor | PTGER2 | P43116 | Family A G protein-coupled receptor | 0.111501865 |
| arachidonic acid | DNA polymerase beta | POLB | P06746 | Enzyme | 0.111501865 |
| arachidonic acid | Cytochrome P450 26B1 | CYP26B1 | Q9NR63 | Cytochrome P450 | 0.111501865 |
| arachidonic acid | Cytochrome P450 26A1 | CYP26A1 | O43174 | Cytochrome P450 | 0.111501865 |
| arachidonic acid | Carboxylesterase 2 | CES2 | O00748 | Enzyme | 0.111501865 |
| arachidonic acid | Arachidonate 12-lipoxygenase | ALOX12 | P18054 | Enzyme | 0.111501865 |
| arachidonic acid | Dual specificity phosphatase Cdc25A | CDC25A | P30304 | Phosphatase | 0.111501865 |
| arachidonic acid | Protein-tyrosine phosphatase 1B | PTPN1 | P18031 | Phosphatase | 0.111501865 |
| arachidonic acid | G protein-coupled receptor 44 | PTGDR2 | Q9Y5Y4 | Family A G protein-coupled receptor | 0.111501865 |
| arachidonic acid | Protein-tyrosine phosphatase 2C | PTPN11 | Q06124 | Phosphatase | 0.111501865 |
| arachidonic acid | 11-beta-hydroxysteroid dehydrogenase 1 | HSD11B1 | P28845 | Enzyme | 0.111501865 |
| arachidonic acid | Prostanoid EP1 receptor | PTGER1 | P34995 | Family A G protein-coupled receptor | 0.111501865 |
| arachidonic acid | Retinoid X receptor alpha | RXRA | P19793 | Nuclear receptor | 0.111501865 |
| arachidonic acid | Retinoic acid receptor gamma | RARG | P13631 | Nuclear receptor | 0.111501865 |
| arachidonic acid | Retinoic acid receptor beta | RARB | P10826 | Nuclear receptor | 0.111501865 |
| arachidonic acid | Retinoic acid receptor alpha | RARA | P10276 | Nuclear receptor | 0.111501865 |
| arachidonic acid | Retinoid X receptor beta | RXRB | P28702 | Nuclear receptor | 0.111501865 |
| arachidonic acid | Retinoid X receptor gamma | RXRG | P48443 | Nuclear receptor | 0.111501865 |
| arachidonic acid | Prostanoid EP4 receptor | PTGER4 | P35408 | Family A G protein-coupled receptor | 0.111501865 |
| arachidonic acid | Estrogen receptor beta | ESR2 | Q92731 | Nuclear receptor | 0.111501865 |
| arachidonic acid | Solute carrier family 22 member 12 | SLC22A12 | Q96S37 | Electrochemical transporter | 0.111501865 |
| arachidonic acid | 11-beta-hydroxysteroid dehydrogenase 2 | HSD11B2 | P80365 | Enzyme | 0.111501865 |
| arachidonic acid | Arachidonate 15-lipoxygenase | ALOX15 | P16050 | Enzyme | 0.111501865 |
| arachidonic acid | Thromboxane-A synthase | TBXAS1 | P24557 | Cytochrome P450 | 0.111501865 |
| arachidonic acid | LXR-alpha | NR1H3 | Q13133 | Nuclear receptor | 0.111501865 |
| arachidonic acid | Fatty acid binding protein intestinal | FABP2 | P12104 | Fatty acid binding protein family | 0.111501865 |
| arachidonic acid | T-cell protein-tyrosine phosphatase | PTPN2 | P17706 | Phosphatase | 0.111501865 |
| arachidonic acid | HMG-CoA reductase | HMGCR | P04035 | Oxidoreductase | 0.111501865 |
| arachidonic acid | Prostanoid IP receptor | PTGIR | P43119 | Family A G protein-coupled receptor | 0.111501865 |
| arachidonic acid | Autotaxin | ENPP2 | Q13822 | Enzyme | 0.111501865 |
| arachidonic acid | Prostaglandin E synthase 2 | PTGES2 | Q9H7Z7 | Enzyme | 0.111501865 |
| arachidonic acid | Leukotriene B4 receptor 1 | LTB4R | Q15722 | Family A G protein-coupled receptor | 0.111501865 |
| arachidonic acid | Glycine receptor subunit alpha-1 | GLRA1 | P23415 | Ligand-gated ion channel | 0.111501865 |
| arachidonic acid | Glucocorticoid receptor | NR3C1 | P04150 | Nuclear receptor | 0.111501865 |
| arachidonic acid | Protein kinase C eta | PRKCH | P24723 | Kinase | 0.111501865 |
| arachidonic acid | Aldo-keto reductase family 1 member B10 | AKR1B10 | O60218 | Enzyme | 0.111501865 |
| arachidonic acid | Metabotropic glutamate receptor 2 (by homology) | GRM2 | Q14416 | Family C G protein-coupled receptor | 0.111501865 |
| arachidonic acid | Nuclear receptor subfamily 0 group B member 2 | NR0B2 | Q15466 | Nuclear receptor | 0.111501865 |
| arachidonic acid | Cytosolic phospholipase A2 | PLA2G4A | P47712 | Enzyme | 0.111501865 |
| arachidonic acid | G-protein coupled receptor 120 | FFAR4 | Q5NUL3 | Family A G protein-coupled receptor | 0.111501865 |
| arachidonic acid | Sn1-specific diacylglycerol lipase alpha | DAGLA | Q9Y4D2 | Enzyme | 0.111501865 |
| arachidonic acid | Transient receptor potential cation channel subfamily A member 1 | TRPA1 | O75762 | Voltage-gated ion channel | 0.111501865 |
| arachidonic acid | Oxoeicosanoid receptor 1 | OXER1 | Q8TDS5 | Family A G protein-coupled receptor | 0.111501865 |
| arachidonic acid | Monocarboxylate transporter 1 (by homology) | SLC16A1 | P53985 | Electrochemical transporter | 0.111501865 |
| arachidonic acid | Phosphodiesterase 4A | PDE4A | P27815 | Phosphodiesterase | 0.111501865 |
| arachidonic acid | Cannabinoid receptor 2 | CNR2 | P34972 | Family A G protein-coupled receptor | 0.111501865 |
| arachidonic acid | Protein-tyrosine phosphatase 1C | PTPN6 | P29350 | Phosphatase | 0.111501865 |
| arachidonic acid | Gamma-secretase | PSEN2 PSENEN NCSTN APH1A PSEN1 APH1B | P49810 Q9NZ42 Q92542 Q96BI3 P49768 Q8WW43 | Protease | 0.111501865 |
| arachidonic acid | Sn1-specific diacylglycerol lipase beta | DAGLB | Q8NCG7 | Enzyme | 0.111501865 |
| arachidonic acid | Glucagon | GCG | P01275 | Unclassified protein | 0.111501865 |
| arachidonic acid | Transient receptor potential cation channel subfamily M member 8 | TRPM8 | Q7Z2W7 | Voltage-gated ion channel | 0.111501865 |
| arachidonic acid | Muscle glycogen synthase | GYS1 | P13807 | Enzyme | 0.111501865 |
| arachidonic acid | 5-lipoxygenase activating protein | ALOX5AP | P20292 | Other cytosolic protein | 0.111501865 |
| arachidonic acid | Nitric oxide synthase, inducible | NOS2 | P35228 | Enzyme | 0.111501865 |
| arachidonic acid | Matrix metalloproteinase 13 | MMP13 | P45452 | Protease | 0.111501865 |
| arachidonic acid | Matrix metalloproteinase 3 | MMP3 | P08254 | Protease | 0.111501865 |
| arachidonic acid | Plasma retinol-binding protein | RBP4 | P02753 | Secreted protein | 0.111501865 |
| arachidonic acid | Matrix metalloproteinase 8 | MMP8 | P22894 | Protease | 0.111501865 |
| arachidonic acid | L-lactate dehydrogenase A chain | LDHA | P00338 | Enzyme | 0.111501865 |
| arachidonic acid | Estrogen receptor alpha | ESR1 | P03372 | Nuclear receptor | 0.111501865 |
| arachidonic acid | Angiotensin-converting enzyme | ACE | P12821 | Protease | 0.111501865 |
| arachidonic acid | Intercellular adhesion molecule (ICAM-1), Integrin alpha-L/beta-2 | ITGAL ICAM1 ITGB2 | P20701 P05362 P05107 | Membrane receptor | 0.111501865 |
| arachidonic acid | Type-1 angiotensin II receptor (by homology) | AGTR1 | P30556 | Family A G protein-coupled receptor | 0.111501865 |
| arachidonic acid | Hepatocyte nuclear factor 4-alpha | HNF4A | P41235 | Unclassified protein | 0.111501865 |
| arachidonic acid | Vanilloid receptor | TRPV1 | Q8NER1 | Voltage-gated ion channel | 0.111501865 |
| arachidonic acid | Lysine-specific demethylase 2A | KDM2A | Q9Y2K7 | Eraser | 0.111501865 |
| arachidonic acid | Lysine-specific demethylase 5C | KDM5C | P41229 | Eraser | 0.111501865 |
| arachidonic acid | Group X secretory phospholipase A2 | PLA2G10 | O15496 | Enzyme | 0.111501865 |
| arachidonic acid | Nuclear receptor ROR-gamma | RORC | P51449 | Nuclear receptor | 0.111501865 |
| arachidonic acid | Phosphodiesterase 4D | PDE4D | Q08499 | Phosphodiesterase | 0.111501865 |
| arachidonic acid | Dihydroorotate dehydrogenase | DHODH | Q02127 | Oxidoreductase | 0.111501865 |
| arachidonic acid | Endothelin receptor ET-A (by homology) | EDNRA | P25101 | Family A G protein-coupled receptor | 0.111501865 |
| arachidonic acid | Phosphodiesterase 4B | PDE4B | Q07343 | Phosphodiesterase | 0.111501865 |
| arachidonic acid | Bone morphogenetic protein 1 | BMP1 | P13497 | Protease | 0.111501865 |
| arachidonic acid | Cholecystokinin B receptor | CCKBR | P32239 | Family A G protein-coupled receptor | 0.111501865 |
| arachidonic acid | p53-binding protein Mdm-2 | MDM2 | Q00987 | Other nuclear protein | 0.111501865 |
| arachidonic acid | Chymase | CMA1 | P23946 | Protease | 0.111501865 |
| arachidonic acid | Cathepsin G | CTSG | P08311 | Protease | 0.111501865 |
| arachidonic acid | Androgen Receptor | AR | P10275 | Nuclear receptor | 0.111501865 |
| arachidonic acid | Protein farnesyltransferase | FNTA FNTB | P49354 P49356 | Enzyme | 0.111501865 |
| arachidonic acid | Presenilin 1 | PSEN1 | P49768 | Other ion channel | 0.111501865 |
| arachidonic acid | Acyl coenzyme A:cholesterol acyltransferase 1 | SOAT1 | P35610 | Enzyme | 0.111501865 |
| arachidonic acid | Acyl coenzyme A:cholesterol acyltransferase 2 | SOAT2 | O75908 | Enzyme | 0.111501865 |
| arachidonic acid | Proteinase-activated receptor 1 | F2R | P25116 | Family A G protein-coupled receptor | 0.111501865 |
| astilbin | Cyclooxygenase-1 | PTGS1 | P23219 | Oxidoreductase | 0.106542926 |
| astilbin | Carbonic anhydrase XII | CA12 | O43570 | Lyase | 0.106542926 |
| astilbin | Matrix metalloproteinase 13 | MMP13 | P45452 | Protease | 0.106542926 |
| astilbin | Matrix metalloproteinase 12 | MMP12 | P39900 | Protease | 0.106542926 |
| astilbin | P-glycoprotein 1 | ABCB1 | P08183 | Primary active transporter | 0.106542926 |
| astilbin | Tyrosyl-DNA phosphodiesterase 1 | TDP1 | Q9NUW8 | Enzyme | 0.106542926 |
| astilbin | Cytochrome P450 19A1 | CYP19A1 | P11511 | Cytochrome P450 | 0.106542926 |
| astilbin | Matrix metalloproteinase 2 | MMP2 | P08253 | Protease | 0.106542926 |
| astilbin | Carbonic anhydrase II | CA2 | P00918 | Lyase | 0.106542926 |
| astilbin | Carbonic anhydrase I | CA1 | P00915 | Lyase | 0.106542926 |
| astilbin | Carbonic anhydrase VB | CA5B | Q9Y2D0 | Lyase | 0.106542926 |
| astilbin | Sodium/glucose cotransporter 1 | SLC5A1 | P13866 | Electrochemical transporter | 0.106542926 |
| astilbin | Microtubule-associated protein tau | MAPT | P10636 | Unclassified protein | 0.106542926 |
| astilbin | Dual-specificity tyrosine-phosphorylation regulated kinase 1A | DYRK1A | Q13627 | Kinase | 0.106542926 |
| astilbin | HERG | KCNH2 | Q12809 | Voltage-gated ion channel | 0.106542926 |
| astilbin | Beta amyloid A4 protein | APP | P05067 | Membrane receptor | 0.106542926 |
| astilbin | Telomerase reverse transcriptase | TERT | O14746 | Enzyme | 0.106542926 |
| astilbin | 6-phosphogluconate dehydrogenase | PGD | P52209 | Enzyme | 0.106542926 |
| astilbin | CMP-N-acetylneuraminate-beta-1,4-galactoside alpha-2,3-sialyltransferase | ST3GAL3 | Q11203 | Transferase | 0.106542926 |
| astilbin | Alpha-(1,3)-fucosyltransferase 7 | FUT7 | Q11130 | Transferase | 0.106542926 |
| astilbin | Hepatocyte growth factor receptor | MET | P08581 | Kinase | 0.106542926 |
| astilbin | Matrix metalloproteinase 14 | MMP14 | P50281 | Protease | 0.106542926 |
| astilbin | Beta-secretase 1 | BACE1 | P56817 | Protease | 0.106542926 |
| astilbin | Fucosyltransferase 4 | FUT4 | P22083 | Enzyme | 0.106542926 |
| astilbin | Signal transducer and activator of transcription 1-alpha/beta | STAT1 | P42224 | Transcription factor | 0.106542926 |
| astilbin | Squalene monooxygenase (by homology) | SQLE | Q14534 | Enzyme | 0.106542926 |
| astilbin | Kallikrein 1 | KLK1 | P06870 | Protease | 0.106542926 |
| astilbin | Kallikrein 2 | KLK2 | P20151 | Protease | 0.106542926 |
| astilbin | Low affinity sodium-glucose cotransporter | SLC5A4 | Q9NY91 | Electrochemical transporter | 0.106542926 |
| astilbin | Sodium/glucose cotransporter 2 | SLC5A2 | P31639 | Electrochemical transporter | 0.106542926 |
| astilbin | Adenosine A2a receptor (by homology) | ADORA2A | P29274 | Family A G protein-coupled receptor | 0.106542926 |
| astilbin | Solute carrier family 28 member 3 | SLC28A3 | Q9HAS3 | Electrochemical transporter | 0.106542926 |
| astilbin | Matrix metalloproteinase 7 | MMP7 | P09237 | Protease | 0.106542926 |
| astilbin | Matrix metalloproteinase 8 | MMP8 | P22894 | Protease | 0.106542926 |
| astilbin | Cytochrome P450 1B1 | CYP1B1 | Q16678 | Cytochrome P450 | 0.106542926 |
| astilbin | Carbonic anhydrase VII | CA7 | P43166 | Lyase | 0.106542926 |
| astilbin | Carbonic anhydrase IV | CA4 | P22748 | Lyase | 0.106542926 |
| beta-carotene | Plasma retinol-binding protein | RBP4 | P02753 | Secreted protein | 0.086885855 |
| beta-sitosterol | HMG-CoA reductase | HMGCR | P04035 | Oxidoreductase | 0.680955494 |
| beta-sitosterol | Cytochrome P450 51 (by homology) | CYP51A1 | Q16850 | Cytochrome P450 | 0.680955494 |
| beta-sitosterol | Androgen Receptor | AR | P10275 | Nuclear receptor | 0.656003572 |
| beta-sitosterol | Niemann-Pick C1-like protein 1 | NPC1L1 | Q9UHC9 | Other membrane protein | 0.647646922 |
| beta-sitosterol | LXR-alpha | NR1H3 | Q13133 | Nuclear receptor | 0.622655937 |
| beta-sitosterol | Cytochrome P450 17A1 | CYP17A1 | P05093 | Cytochrome P450 | 0.506040802 |
| beta-sitosterol | Nuclear receptor ROR-gamma | RORC | P51449 | Nuclear receptor | 0.431038563 |
| beta-sitosterol | Cytochrome P450 19A1 | CYP19A1 | P11511 | Cytochrome P450 | 0.314405075 |
| beta-sitosterol | Estrogen receptor beta | ESR2 | Q92731 | Nuclear receptor | 0.306043655 |
| beta-sitosterol | Estrogen receptor alpha | ESR1 | P03372 | Nuclear receptor | 0.222798333 |
| beta-sitosterol | Testis-specific androgen-binding protein | SHBG | P04278 | Secreted protein | 0.189458322 |
| beta-sitosterol | Sterol regulatory element-binding protein 2 | SREBF2 | Q12772 | Unclassified protein | 0.172809876 |
| beta-sitosterol | Cytochrome P450 2C19 | CYP2C19 | P33261 | Cytochrome P450 | 0.131155749 |
| beta-sitosterol | Norepinephrine transporter | SLC6A2 | P23975 | Electrochemical transporter | 0.12282732 |
| beta-sitosterol | Butyrylcholinesterase | BCHE | P06276 | Hydrolase | 0.12282732 |
| beta-sitosterol | Nuclear receptor ROR-alpha | RORA | P35398 | Nuclear receptor | 0.12282732 |
| beta-sitosterol | Protein-tyrosine phosphatase 1B | PTPN1 | P18031 | Phosphatase | 0.12282732 |
| beta-sitosterol | Corticosteroid binding globulin | SERPINA6 | P08185 | Secreted protein | 0.11449479 |
| beta-sitosterol | Serotonin transporter | SLC6A4 | P31645 | Electrochemical transporter | 0.106165761 |
| beta-sitosterol | Glucose-6-phosphate 1-dehydrogenase | G6PD | P11413 | Enzyme | 0.106165761 |
| beta-sitosterol | Nuclear receptor subfamily 1 group I member 3 (by homology) | NR1I3 | Q14994 | Nuclear receptor | 0.106165761 |
| beta-sitosterol | Muscarinic acetylcholine receptor M2 | CHRM2 | P08172 | Family A G protein-coupled receptor | 0.106165761 |
| beta-sitosterol | Acetylcholinesterase | ACHE | P22303 | Hydrolase | 0.106165761 |
| beta-sitosterol | Vitamin D receptor | VDR | P11473 | Nuclear receptor | 0.106165761 |
| beta-sitosterol | Carboxylesterase 2 | CES2 | O00748 | Enzyme | 0.106165761 |
| beta-sitosterol | LXR-beta | NR1H2 | P55055 | Nuclear receptor | 0.106165761 |
| beta-sitosterol | Dual specificity phosphatase Cdc25A | CDC25A | P30304 | Phosphatase | 0.106165761 |
| beta-sitosterol | Prostanoid EP1 receptor (by homology) | PTGER1 | P34995 | Family A G protein-coupled receptor | 0.106165761 |
| beta-sitosterol | Prostanoid EP2 receptor (by homology) | PTGER2 | P43116 | Family A G protein-coupled receptor | 0.106165761 |
| beta-sitosterol | 11-beta-hydroxysteroid dehydrogenase 1 | HSD11B1 | P28845 | Enzyme | 0.106165761 |
| beta-sitosterol | Anti-estrogen binding site (AEBS) (by homology) | DHCR7 | Q9UBM7 | Enzyme | 0.106165761 |
| beta-sitosterol | Glycine receptor subunit alpha-1 | GLRA1 | P23415 | Ligand-gated ion channel | 0.106165761 |
| beta-sitosterol | Peroxisome proliferator-activated receptor delta | PPARD | Q03181 | Nuclear receptor | 0.106165761 |
| beta-sitosterol | Squalene monooxygenase | SQLE | Q14534 | Enzyme | 0.106165761 |
| beta-sitosterol | Protein-tyrosine phosphatase 1C | PTPN6 | P29350 | Phosphatase | 0.106165761 |
| beta-sitosterol | Squalene synthetase (by homology) | FDFT1 | P37268 | Enzyme | 0.106165761 |
| beta-sitosterol | Nitric oxide synthase, inducible (by homology) | NOS2 | P35228 | Enzyme | 0.106165761 |
| beta-sitosterol | Glucocorticoid receptor | NR3C1 | P04150 | Nuclear receptor | 0.106165761 |
| beta-sitosterol | Dual specificity phosphatase Cdc25B | CDC25B | P30305 | Phosphatase | 0.106165761 |
| beta-sitosterol | Sonic hedgehog protein (by homology) | SHH | Q15465 | Unclassified protein | 0.106165761 |
| beta-sitosterol | UDP-glucuronosyltransferase 2B7 | UGT2B7 | P16662 | Enzyme | 0.106165761 |
| beta-sitosterol | 11-beta-hydroxysteroid dehydrogenase 2 | HSD11B2 | P80365 | Enzyme | 0.106165761 |
| beta-sitosterol | Dopamine D2 receptor | DRD2 | P14416 | Family A G protein-coupled receptor | 0.106165761 |
| beta-sitosterol | DNA polymerase beta (by homology) | POLB | P06746 | Enzyme | 0.106165761 |
| cryptotanshinone | Aldose reductase (by homology) | AKR1B1 | P15121 | Enzyme | 1 |
| cryptotanshinone | Acetylcholinesterase | ACHE | P22303 | Hydrolase | 1 |
| cryptotanshinone | Acyl coenzyme A:cholesterol acyltransferase | CES1 | P23141 | Enzyme | 1 |
| cryptotanshinone | Carboxylesterase 2 | CES2 | O00748 | Enzyme | 1 |
| cryptotanshinone | Signal transducer and activator of transcription 3 | STAT3 | P40763 | Transcription factor | 1 |
| cryptotanshinone | Protein-tyrosine phosphatase 1C | PTPN6 | P29350 | Phosphatase | 0.12730257 |
| cryptotanshinone | Protein-tyrosine phosphatase 2C | PTPN11 | Q06124 | Phosphatase | 0.12730257 |
| cryptotanshinone | Indoleamine 2,3-dioxygenase | IDO1 | P14902 | Enzyme | 0.111501865 |
| cryptotanshinone | Tyrosyl-DNA phosphodiesterase 2 | TDP2 | O95551 | Enzyme | 0.111501865 |
| cryptotanshinone | Mucosa-associated lymphoid tissue lymphoma translocation protein 1 | MALT1 | Q9UDY8 | Hydrolase | 0.111501865 |
| cryptotanshinone | Lysine-specific demethylase 4D-like | KDM4E | B2RXH2 | Eraser | 0.111501865 |
| cryptotanshinone | Dual specificity phosphatase Cdc25B | CDC25B | P30305 | Phosphatase | 0.111501865 |
| cryptotanshinone | Cannabinoid receptor 2 | CNR2 | P34972 | Family A G protein-coupled receptor | 0.111501865 |
| cryptotanshinone | Muscarinic acetylcholine receptor M2 (by homology) | CHRM2 | P08172 | Family A G protein-coupled receptor | 0.111501865 |
| cryptotanshinone | Muscarinic acetylcholine receptor M1 (by homology) | CHRM1 | P11229 | Family A G protein-coupled receptor | 0.111501865 |
| cryptotanshinone | Muscarinic acetylcholine receptor M3 (by homology) | CHRM3 | P20309 | Family A G protein-coupled receptor | 0.111501865 |
| cryptotanshinone | Poly [ADP-ribose] polymerase-1 | PARP1 | P09874 | Enzyme | 0.111501865 |
| cryptotanshinone | Protein-tyrosine phosphatase 1B | PTPN1 | P18031 | Phosphatase | 0.111501865 |
| cryptotanshinone | Dual specificity protein phosphatase 1 (by homology) | DUSP1 | P28562 | Enzyme | 0.111501865 |
| cryptotanshinone | Protein-glutamine gamma-glutamyltransferase | TGM2 | P21980 | Enzyme | 0.111501865 |
| cryptotanshinone | Coagulation factor XIII | F13A1 | P00488 | Aminoacyltransferase | 0.111501865 |
| cryptotanshinone | c-Jun N-terminal kinase 3 | MAPK10 | P53779 | Kinase | 0.111501865 |
| cryptotanshinone | Vascular endothelial growth factor receptor 2 | KDR | P35968 | Kinase | 0.111501865 |
| cryptotanshinone | Adenosine A1 receptor (by homology) | ADORA1 | P30542 | Family A G protein-coupled receptor | 0.111501865 |
| cryptotanshinone | Adenosine A2a receptor (by homology) | ADORA2A | P29274 | Family A G protein-coupled receptor | 0.111501865 |
| cryptotanshinone | DNA topoisomerase I (by homology) | TOP1 | P11387 | Isomerase | 0.111501865 |
| cryptotanshinone | Epoxide hydratase | EPHX2 | P34913 | Protease | 0.111501865 |
| cryptotanshinone | Leukocyte common antigen | PTPRC | P08575 | Enzyme | 0.111501865 |
| cryptotanshinone | Melatonin receptor 1A | MTNR1A | P48039 | Family A G protein-coupled receptor | 0.111501865 |
| cryptotanshinone | Melatonin receptor 1B | MTNR1B | P49286 | Family A G protein-coupled receptor | 0.111501865 |
| cryptotanshinone | Neuropeptide Y receptor type 5 | NPY5R | Q15761 | Family A G protein-coupled receptor | 0.111501865 |
| cryptotanshinone | Dual specificity protein phosphatase 3 | DUSP3 | P51452 | Phosphatase | 0.111501865 |
| cryptotanshinone | Intercellular adhesion molecule-1 | ICAM1 | P05362 | Adhesion | 0.111501865 |
| cryptotanshinone | Selectin E | SELE | P16581 | Adhesion | 0.111501865 |
| cryptotanshinone | Sodium channel protein type IX alpha subunit | SCN9A | Q15858 | Voltage-gated ion channel | 0.111501865 |
| cryptotanshinone | Kinesin-like protein 1 | KIF11 | P52732 | Other cytosolic protein | 0.111501865 |
| cryptotanshinone | Lysine-specific demethylase 4C | KDM4C | Q9H3R0 | Eraser | 0.111501865 |
| cryptotanshinone | Phosphodiesterase 5A | PDE5A | O76074 | Phosphodiesterase | 0.111501865 |
| cryptotanshinone | Hormone sensitive lipase | LIPE | Q05469 | Enzyme | 0.111501865 |
| cryptotanshinone | Cytochrome P450 19A1 | CYP19A1 | P11511 | Cytochrome P450 | 0.111501865 |
| cryptotanshinone | Focal adhesion kinase 1 | PTK2 | Q05397 | Kinase | 0.111501865 |
| cryptotanshinone | Cytochrome P450 17A1 | CYP17A1 | P05093 | Cytochrome P450 | 0.111501865 |
| cryptotanshinone | Macrophage colony stimulating factor receptor | CSF1R | P07333 | Kinase | 0.111501865 |
| cryptotanshinone | Adenosine A2b receptor | ADORA2B | P29275 | Family A G protein-coupled receptor | 0.111501865 |
| cryptotanshinone | DNA topoisomerase II alpha | TOP2A | P11388 | Isomerase | 0.111501865 |
| cryptotanshinone | Dipeptidyl peptidase I | CTSC | P53634 | Protease | 0.111501865 |
| cryptotanshinone | Cathepsin K | CTSK | P43235 | Protease | 0.111501865 |
| cryptotanshinone | Cathepsin L | CTSL | P07711 | Protease | 0.111501865 |
| cryptotanshinone | Metabotropic glutamate receptor 5 | GRM5 | P41594 | Family C G protein-coupled receptor | 0.111501865 |
| cryptotanshinone | Toll-like receptor (TLR7/TLR9) | TLR9 | Q9NR96 | Toll-like and Il-1 receptors | 0.111501865 |
| cryptotanshinone | Tankyrase-2 | TNKS2 | Q9H2K2 | Enzyme | 0.111501865 |
| cryptotanshinone | Cyclin-dependent kinase 5/CDK5 activator 1 | CDK5R1 CDK5 | Q15078 Q00535 | Kinase | 0.111501865 |
| cryptotanshinone | Serotonin 2a (5-HT2a) receptor | HTR2A | P28223 | Family A G protein-coupled receptor | 0.111501865 |
| cryptotanshinone | Serotonin 2c (5-HT2c) receptor | HTR2C | P28335 | Family A G protein-coupled receptor | 0.111501865 |
| cryptotanshinone | Tyrosine-protein kinase TYK2 | TYK2 | P29597 | Kinase | 0.111501865 |
| cryptotanshinone | NAD-dependent deacetylase sirtuin 2 | SIRT2 | Q8IXJ6 | Eraser | 0.111501865 |
| cryptotanshinone | Fibroblast activation protein alpha (by homology) | FAP | Q12884 | Protease | 0.111501865 |
| cryptotanshinone | Leucine-rich repeat serine/threonine-protein kinase 2 | LRRK2 | Q5S007 | Kinase | 0.111501865 |
| cryptotanshinone | Cyclooxygenase-1 | PTGS1 | P23219 | Oxidoreductase | 0.111501865 |
| cryptotanshinone | Cyclooxygenase-2 | PTGS2 | P35354 | Oxidoreductase | 0.111501865 |
| cryptotanshinone | N-acylsphingosine-amidohydrolase (by homology) | NAAA | Q02083 | Enzyme | 0.111501865 |
| cryptotanshinone | Glycogen synthase kinase-3 beta | GSK3B | P49841 | Kinase | 0.111501865 |
| cryptotanshinone | Phosphodiesterase 4B | PDE4B | Q07343 | Phosphodiesterase | 0.111501865 |
| cryptotanshinone | Glycogen synthase kinase-3 alpha | GSK3A | P49840 | Kinase | 0.111501865 |
| cryptotanshinone | Phosphodiesterase 7A | PDE7A | Q13946 | Phosphodiesterase | 0.111501865 |
| cryptotanshinone | Alpha-2a adrenergic receptor | ADRA2A | P08913 | Family A G protein-coupled receptor | 0.111501865 |
| cryptotanshinone | Epidermal growth factor receptor erbB1 | EGFR | P00533 | Kinase | 0.111501865 |
| diosgenin | Interleukin-2 | IL2 | P60568 | Secreted protein | 0.106165761 |
| diosgenin | LXR-alpha | NR1H3 | Q13133 | Nuclear receptor | 0.106165761 |
| diosgenin | ALK tyrosine kinase receptor | ALK | Q9UM73 | Kinase | 0.106165761 |
| diosgenin | Bile acid receptor FXR | NR1H4 | Q96RI1 | Nuclear receptor | 0.106165761 |
| diosgenin | Protein-tyrosine phosphatase 1B | PTPN1 | P18031 | Phosphatase | 0.106165761 |
| diosgenin | LXR-beta | NR1H2 | P55055 | Nuclear receptor | 0.106165761 |
| diosgenin | p53-binding protein Mdm-2 | MDM2 | Q00987 | Other nuclear protein | 0.106165761 |
| diosgenin | Voltage-gated potassium channel subunit Kv1.3 | KCNA3 | P22001 | Voltage-gated ion channel | 0.106165761 |
| diosgenin | C-C chemokine receptor type 1 | CCR1 | P32246 | Family A G protein-coupled receptor | 0.106165761 |
| diosgenin | Smoothened homolog | SMO | Q99835 | Frizzled family G protein-coupled receptor | 0.106165761 |
| diosgenin | Vanilloid receptor | TRPV1 | Q8NER1 | Voltage-gated ion channel | 0.106165761 |
| diosgenin | Sonic hedgehog protein (by homology) | SHH | Q15465 | Unclassified protein | 0.106165761 |
| diosgenin | Serine/threonine-protein kinase PLK1 | PLK1 | P53350 | Kinase | 0.106165761 |
| diosgenin | Corticotropin releasing factor receptor 1 (by homology) | CRHR1 | P34998 | Family B G protein-coupled receptor | 0.106165761 |
| diosgenin | Lysosomal Pro-X carboxypeptidase | PRCP | P42785 | Protease | 0.106165761 |
| diosgenin | Cytochrome P450 51 (by homology) | CYP51A1 | Q16850 | Cytochrome P450 | 0.106165761 |
| diosgenin | Macrophage colony stimulating factor receptor | CSF1R | P07333 | Kinase | 0.106165761 |
| diosgenin | Tyrosine-protein kinase ABL | ABL1 | P00519 | Kinase | 0.106165761 |
| diosgenin | Vascular endothelial growth factor receptor 1 | FLT1 | P17948 | Kinase | 0.106165761 |
| diosgenin | Platelet-derived growth factor receptor beta | PDGFRB | P09619 | Kinase | 0.106165761 |
| diosgenin | Stem cell growth factor receptor | KIT | P10721 | Kinase | 0.106165761 |
| diosgenin | Insulin-like growth factor I receptor | IGF1R | P08069 | Kinase | 0.106165761 |
| diosgenin | Tyrosine-protein kinase receptor FLT3 | FLT3 | P36888 | Kinase | 0.106165761 |
| diosgenin | Insulin receptor | INSR | P06213 | Kinase | 0.106165761 |
| diosgenin | Kinesin-1 heavy chain/ Tyrosine-protein kinase receptor RET | RET | P07949 | Kinase | 0.106165761 |
| diosgenin | Tyrosine-protein kinase LCK | LCK | P06239 | Kinase | 0.106165761 |
| diosgenin | Tyrosine-protein kinase SYK | SYK | P43405 | Kinase | 0.106165761 |
| diosgenin | Tyrosine-protein kinase SRC | SRC | P12931 | Kinase | 0.106165761 |
| diosgenin | Macrophage-stimulating protein receptor | MST1R | Q04912 | Kinase | 0.106165761 |
| diosgenin | Fibroblast growth factor receptor 3 | FGFR3 | P22607 | Kinase | 0.106165761 |
| diosgenin | Tyrosine-protein kinase ZAP-70 | ZAP70 | P43403 | Kinase | 0.106165761 |
| diosgenin | Nerve growth factor receptor Trk-A | NTRK1 | P04629 | Kinase | 0.106165761 |
| diosgenin | Tyrosine-protein kinase JAK2 | JAK2 | O60674 | Kinase | 0.106165761 |
| diosgenin | Hepatocyte growth factor receptor | MET | P08581 | Kinase | 0.106165761 |
| diosgenin | Tyrosine-protein kinase BMX | BMX | P51813 | Kinase | 0.106165761 |
| diosgenin | Tyrosine-protein kinase Lyn | LYN | P07948 | Kinase | 0.106165761 |
| diosgenin | Fibroblast growth factor receptor 4 | FGFR4 | P22455 | Kinase | 0.106165761 |
| diosgenin | Tyrosine-protein kinase FGR | FGR | P09769 | Kinase | 0.106165761 |
| diosgenin | Neurotrophic tyrosine kinase receptor type 2 | NTRK2 | Q16620 | Kinase | 0.106165761 |
| diosgenin | Serine/threonine-protein kinase B-raf | BRAF | P15056 | Kinase | 0.106165761 |
| diosgenin | Tyrosine-protein kinase receptor Tie-1 | TIE1 | P35590 | Kinase | 0.106165761 |
| diosgenin | Tyrosine-protein kinase receptor TYRO3 | TYRO3 | Q06418 | Kinase | 0.106165761 |
| diosgenin | Proto-oncogene tyrosine-protein kinase MER | MERTK | Q12866 | Kinase | 0.106165761 |
| diosgenin | Proto-oncogene tyrosine-protein kinase ROS | ROS1 | P08922 | Kinase | 0.106165761 |
| diosgenin | NT-3 growth factor receptor | NTRK3 | Q16288 | Kinase | 0.106165761 |
| diosgenin | Fatty acid synthase | FASN | P49327 | Transferase | 0.106165761 |
| diosgenin | Interleukin-6 receptor subunit beta | IL6ST | P40189 | Membrane receptor | 0.106165761 |
| diosgenin | Glutamate NMDA receptor; GRIN1/GRIN2A | GRIN2A GRIN1 | Q12879 Q05586 | Ligand-gated ion channel | 0.106165761 |
| diosgenin | Pregnane X receptor | NR1I2 | O75469 | Nuclear receptor | 0.106165761 |
| diosgenin | Glutamate receptor ionotropic, AMPA 2 | GRIA2 | P42262 | Ligand-gated ion channel | 0.106165761 |
| diosgenin | Glycine transporter 1 | SLC6A9 | P48067 | Electrochemical transporter | 0.106165761 |
| diosgenin | Neurokinin 1 receptor | TACR1 | P25103 | Family A G protein-coupled receptor | 0.106165761 |
| diosgenin | MAP kinase p38 alpha | MAPK14 | Q16539 | Kinase | 0.106165761 |
| diosgenin | Cyclooxygenase-1 | PTGS1 | P23219 | Oxidoreductase | 0.106165761 |
| diosgenin | Cytochrome P450 24A1 | CYP24A1 | Q07973 | Enzyme | 0.106165761 |
| diosgenin | Beta amyloid A4 protein | APP | P05067 | Membrane receptor | 0.106165761 |
| diosgenin | Cyclin-dependent kinase 4/cyclin D | CCND3 CCND1 CDK4 CCND2 | P30281 P24385 P11802 P30279 | Other cytosolic protein | 0.106165761 |
| diosgenin | Voltage-gated T-type calcium channel alpha-1H subunit | CACNA1H | O95180 | Voltage-gated ion channel | 0.106165761 |
| diosgenin | Intercellular adhesion molecule (ICAM-1), Integrin alpha-L/beta-2 | ITGAL ICAM1 ITGB2 | P20701 P05362 P05107 | Membrane receptor | 0.106165761 |
| diosgenin | Metabotropic glutamate receptor 1 | GRM1 | Q13255 | Family C G protein-coupled receptor | 0.106165761 |
| diosgenin | Protein Mdm4 | MDM4 | O15151 | Unclassified protein | 0.106165761 |
| diosgenin | Cyclin-dependent kinase 6 | CDK6 | Q00534 | Kinase | 0.106165761 |
| diosgenin | Cyclin-dependent kinase 4 | CDK4 | P11802 | Kinase | 0.106165761 |
| diosgenin | Cytochrome P450 2C9 | CYP2C9 | P11712 | Cytochrome P450 | 0.106165761 |
| diosgenin | Cytochrome P450 3A4 | CYP3A4 | P08684 | Cytochrome P450 | 0.106165761 |
| ginsenoside rh2 | Signal transducer and activator of transcription 3 | STAT3 | P40763 | Transcription factor | 0.10307426 |
| ginsenoside rh2 | Interleukin-2 | IL2 | P60568 | Secreted protein | 0.074564954 |
| ginsenoside rh2 | Heat shock protein HSP 90-alpha | HSP90AA1 | P07900 | Other cytosolic protein | 0.074564954 |
| ginsenoside rh2 | Platelet activating factor receptor | PTAFR | P25105 | Family A G protein-coupled receptor | 0.074564954 |
| ginsenoside rh2 | Gamma-secretase | PSEN2 PSENEN NCSTN APH1A PSEN1 APH1B | P49810 Q9NZ42 Q92542 Q96BI3 P49768 Q8WW43 | Protease | 0.074564954 |
| ginsenoside rh2 | Vascular endothelial growth factor A | VEGFA | P15692 | Secreted protein | 0.074564954 |
| ginsenoside rh2 | Acidic fibroblast growth factor | FGF1 | P05230 | Secreted protein | 0.074564954 |
| ginsenoside rh2 | Basic fibroblast growth factor | FGF2 | P09038 | Secreted protein | 0.074564954 |
| ginsenoside rh2 | Heparanase | HPSE | Q9Y251 | Enzyme | 0.074564954 |
| ginsenoside rh2 | Sodium/potassium-transporting ATPase alpha-1 chain | ATP1A1 | P05023 | Primary active transporter | 0.074564954 |
| ginsenoside rh2 | Apoptosis regulator Bcl-X | BCL2L1 | Q07817 | Other ion channel | 0.074564954 |
| ginsenoside rh2 | Sphingosine 1-phosphate receptor Edg-1 | S1PR1 | P21453 | Family A G protein-coupled receptor | 0.074564954 |
| ginsenoside rh2 | Nuclear receptor ROR-gamma | RORC | P51449 | Nuclear receptor | 0.074564954 |
| ginsenoside rh2 | Galectin-4 | LGALS4 | P56470 | Other cytosolic protein | 0.074564954 |
| ginsenoside rh2 | Galectin-3 | LGALS3 | P17931 | Other cytosolic protein | 0.074564954 |
| ginsenoside rh2 | Galectin-8 | LGALS8 | O00214 | Other cytosolic protein | 0.074564954 |
| ginsenoside rh2 | Neurokinin 2 receptor | TACR2 | P21452 | Family A G protein-coupled receptor | 0.074564954 |
| ginsenoside rh2 | Adenosine A1 receptor (by homology) | ADORA1 | P30542 | Family A G protein-coupled receptor | 0.074564954 |
| ginsenoside rh2 | Tyrosine-protein kinase SYK | SYK | P43405 | Kinase | 0.074564954 |
| ginsenoside rh2 | 11-beta-hydroxysteroid dehydrogenase 2 | HSD11B2 | P80365 | Enzyme | 0.074564954 |
| hirsutin | Transient receptor potential cation channel subfamily A member 1 | TRPA1 | O75762 | Voltage-gated ion channel | 0.041470299 |
| hirsutin | Cytochrome P450 19A1 | CYP19A1 | P11511 | Cytochrome P450 | 0.031226558 |
| hirsutin | Tyrosyl-DNA phosphodiesterase 2 | TDP2 | O95551 | Enzyme | 0.031226558 |
| hirsutin | Poly [ADP-ribose] polymerase-1 | PARP1 | P09874 | Enzyme | 0.031226558 |
| hirsutin | Poly [ADP-ribose] polymerase 3 | PARP3 | Q9Y6F1 | Enzyme | 0.031226558 |
| hirsutin | Poly [ADP-ribose] polymerase 2 | PARP2 | Q9UGN5 | Enzyme | 0.031226558 |
| hirsutin | Poly [ADP-ribose] polymerase 4 | PARP4 | Q9UKK3 | Enzyme | 0.031226558 |
| hirsutin | Tankyrase-1 | TNKS | O95271 | Enzyme | 0.031226558 |
| hirsutin | 11-beta-hydroxysteroid dehydrogenase 1 | HSD11B1 | P28845 | Enzyme | 0.031226558 |
| hirsutin | Steroid 5-alpha-reductase 1 | SRD5A1 | P18405 | Oxidoreductase | 0.031226558 |
| hirsutin | Steroid 5-alpha-reductase 2 | SRD5A2 | P31213 | Oxidoreductase | 0.031226558 |
| hirsutin | 3-beta-hydroxysteroid dehydrogenase/delta 5-->4-isomerase type I | HSD3B1 | P14060 | Enzyme | 0.031226558 |
| hirsutin | Carbonic anhydrase II | CA2 | P00918 | Lyase | 0.031226558 |
| hirsutin | Carbonic anhydrase I | CA1 | P00915 | Lyase | 0.031226558 |
| hirsutin | Carbonic anhydrase XII | CA12 | O43570 | Lyase | 0.031226558 |
| hirsutin | Carbonic anhydrase IX | CA9 | Q16790 | Lyase | 0.031226558 |
| hirsutin | Adenosine A1 receptor | ADORA1 | P30542 | Family A G protein-coupled receptor | 0.031226558 |
| hirsutin | Cyclooxygenase-2 | PTGS2 | P35354 | Oxidoreductase | 0.031226558 |
| hirsutin | Cytochrome P450 17A1 | CYP17A1 | P05093 | Cytochrome P450 | 0.031226558 |
| hirsutin | Monoamine oxidase A | MAOA | P21397 | Oxidoreductase | 0.031226558 |
| hirsutin | Norepinephrine transporter | SLC6A2 | P23975 | Electrochemical transporter | 0.031226558 |
| hirsutin | Cytochrome P450 1A2 | CYP1A2 | P05177 | Cytochrome P450 | 0.031226558 |
| hirsutin | Muscarinic acetylcholine receptor M1 | CHRM1 | P11229 | Family A G protein-coupled receptor | 0.031226558 |
| hirsutin | Serine/threonine-protein kinase Chk2 | CHEK2 | O96017 | Kinase | 0.031226558 |
| hirsutin | dCTP pyrophosphatase 1 | DCTPP1 | Q9H773 | Enzyme | 0.031226558 |
| hirsutin | Androgen Receptor | AR | P10275 | Nuclear receptor | 0.031226558 |
| hirsutin | Progesterone receptor | PGR | P06401 | Nuclear receptor | 0.031226558 |
| hirsutin | Metabotropic glutamate receptor 5 (by homology) | GRM5 | P41594 | Family C G protein-coupled receptor | 0.031226558 |
| hirsutin | Fibroblast activation protein alpha | FAP | Q12884 | Protease | 0.031226558 |
| hirsutin | Muscarinic acetylcholine receptor M4 | CHRM4 | P08173 | Family A G protein-coupled receptor | 0.031226558 |
| hirsutin | Serotonin 7 (5-HT7) receptor | HTR7 | P34969 | Family A G protein-coupled receptor | 0.031226558 |
| hirsutin | P2X purinoceptor 7 | P2RX7 | Q99572 | Ligand-gated ion channel | 0.031226558 |
| hirsutin | Perforin-1 | PRF1 | P14222 | Other ion channel | 0.031226558 |
| hirsutin | Serotonin 2c (5-HT2c) receptor | HTR2C | P28335 | Family A G protein-coupled receptor | 0.031226558 |
| hirsutin | Endothelin receptor ET-A (by homology) | EDNRA | P25101 | Family A G protein-coupled receptor | 0.031226558 |
| hirsutin | Histamine H3 receptor | HRH3 | Q9Y5N1 | Family A G protein-coupled receptor | 0.031226558 |
| hirsutin | Glucocorticoid receptor | NR3C1 | P04150 | Nuclear receptor | 0.031226558 |
| isorhamnetin | Xanthine dehydrogenase | XDH | P47989 | Oxidoreductase | 1 |
| isorhamnetin | Carbonic anhydrase II | CA2 | P00918 | Lyase | 1 |
| isorhamnetin | Carbonic anhydrase VII | CA7 | P43166 | Lyase | 1 |
| isorhamnetin | Carbonic anhydrase XII | CA12 | O43570 | Lyase | 1 |
| isorhamnetin | Carbonic anhydrase IV | CA4 | P22748 | Lyase | 1 |
| isorhamnetin | Cytochrome P450 1B1 | CYP1B1 | Q16678 | Cytochrome P450 | 1 |
| isorhamnetin | Multidrug resistance-associated protein 1 | ABCC1 | P33527 | Primary active transporter | 0.443225384 |
| isorhamnetin | NADPH oxidase 4 | NOX4 | Q9NPH5 | Enzyme | 0.409770184 |
| isorhamnetin | Aldose reductase | AKR1B1 | P15121 | Enzyme | 0.401570421 |
| isorhamnetin | ATP-binding cassette sub-family G member 2 | ABCG2 | Q9UNQ0 | Primary active transporter | 0.284878497 |
| isorhamnetin | Acetylcholinesterase | ACHE | P22303 | Hydrolase | 0.284878497 |
| isorhamnetin | Arachidonate 15-lipoxygenase | ALOX15 | P16050 | Enzyme | 0.284878497 |
| isorhamnetin | Arachidonate 12-lipoxygenase | ALOX12 | P18054 | Enzyme | 0.284878497 |
| isorhamnetin | Insulin-like growth factor I receptor | IGF1R | P08069 | Kinase | 0.268235117 |
| isorhamnetin | Epidermal growth factor receptor erbB1 | EGFR | P00533 | Kinase | 0.268235117 |
| isorhamnetin | Vasopressin V2 receptor | AVPR2 | P30518 | Family A G protein-coupled receptor | 0.259910104 |
| isorhamnetin | Monoamine oxidase A | MAOA | P21397 | Oxidoreductase | 0.259910104 |
| isorhamnetin | Tyrosine-protein kinase receptor FLT3 | FLT3 | P36888 | Kinase | 0.259910104 |
| isorhamnetin | Cytochrome P450 19A1 | CYP19A1 | P11511 | Cytochrome P450 | 0.259910104 |
| isorhamnetin | Thrombin | F2 | P00734 | Protease | 0.259910104 |
| isorhamnetin | Serine/threonine-protein kinase PIM1 | PIM1 | P11309 | Kinase | 0.259910104 |
| isorhamnetin | Arachidonate 5-lipoxygenase | ALOX5 | P09917 | Oxidoreductase | 0.259910104 |
| isorhamnetin | Serine/threonine-protein kinase Aurora-B | AURKB | Q96GD4 | Kinase | 0.259910104 |
| isorhamnetin | Dopamine D4 receptor | DRD4 | P21917 | Family A G protein-coupled receptor | 0.259910104 |
| isorhamnetin | Adenosine A1 receptor (by homology) | ADORA1 | P30542 | Family A G protein-coupled receptor | 0.259910104 |
| isorhamnetin | Glyoxalase I | GLO1 | Q04760 | Enzyme | 0.259910104 |
| isorhamnetin | Myeloperoxidase | MPO | P05164 | Enzyme | 0.259910104 |
| isorhamnetin | PI3-kinase p85-alpha subunit | PIK3R1 | P27986 | Enzyme | 0.259910104 |
| isorhamnetin | Adenosine A2a receptor (by homology) | ADORA2A | P29274 | Family A G protein-coupled receptor | 0.259910104 |
| isorhamnetin | Death-associated protein kinase 1 | DAPK1 | P53355 | Kinase | 0.259910104 |
| isorhamnetin | Liver glycogen phosphorylase | PYGL | P06737 | Enzyme | 0.259910104 |
| isorhamnetin | Carbonic anhydrase I | CA1 | P00915 | Lyase | 0.259910104 |
| isorhamnetin | Glycogen synthase kinase-3 beta | GSK3B | P49841 | Kinase | 0.259910104 |
| isorhamnetin | Tyrosine-protein kinase SRC | SRC | P12931 | Kinase | 0.259910104 |
| isorhamnetin | Focal adhesion kinase 1 | PTK2 | Q05397 | Kinase | 0.259910104 |
| isorhamnetin | Estradiol 17-beta-dehydrogenase 2 | HSD17B2 | P37059 | Enzyme | 0.259910104 |
| isorhamnetin | Vascular endothelial growth factor receptor 2 | KDR | P35968 | Kinase | 0.259910104 |
| isorhamnetin | Matrix metalloproteinase 13 | MMP13 | P45452 | Protease | 0.259910104 |
| isorhamnetin | Matrix metalloproteinase 3 | MMP3 | P08254 | Protease | 0.259910104 |
| isorhamnetin | Carbonic anhydrase III | CA3 | P07451 | Lyase | 0.259910104 |
| isorhamnetin | Serine/threonine-protein kinase PLK1 | PLK1 | P53350 | Kinase | 0.259910104 |
| isorhamnetin | Carbonic anhydrase VI | CA6 | P23280 | Lyase | 0.259910104 |
| isorhamnetin | Cyclin-dependent kinase 1 | CDK1 | P06493 | Kinase | 0.259910104 |
| isorhamnetin | Matrix metalloproteinase 9 | MMP9 | P14780 | Protease | 0.259910104 |
| isorhamnetin | Matrix metalloproteinase 2 | MMP2 | P08253 | Protease | 0.259910104 |
| isorhamnetin | Protein kinase N1 | PKN1 | Q16512 | Kinase | 0.259910104 |
| isorhamnetin | Carbonic anhydrase XIV | CA14 | Q9ULX7 | Lyase | 0.259910104 |
| isorhamnetin | Carbonic anhydrase IX | CA9 | Q16790 | Lyase | 0.259910104 |
| isorhamnetin | Casein kinase II alpha | CSNK2A1 | P68400 | Kinase | 0.259910104 |
| isorhamnetin | Hepatocyte growth factor receptor | MET | P08581 | Kinase | 0.259910104 |
| isorhamnetin | Serine/threonine-protein kinase NEK2 | NEK2 | P51955 | Kinase | 0.259910104 |
| isorhamnetin | Interleukin-8 receptor A | CXCR1 | P25024 | Family A G protein-coupled receptor | 0.259910104 |
| isorhamnetin | CaM kinase II beta | CAMK2B | Q13554 | Kinase | 0.259910104 |
| isorhamnetin | ALK tyrosine kinase receptor | ALK | Q9UM73 | Kinase | 0.259910104 |
| isorhamnetin | Serine/threonine-protein kinase AKT | AKT1 | P31749 | Kinase | 0.259910104 |
| isorhamnetin | P-glycoprotein 1 | ABCB1 | P08183 | Primary active transporter | 0.259910104 |
| isorhamnetin | Serine/threonine-protein kinase NEK6 | NEK6 | Q9HC98 | Kinase | 0.259910104 |
| isorhamnetin | Phospholipase A2 group 1B | PLA2G1B | P04054 | Enzyme | 0.259910104 |
| isorhamnetin | Carbonic anhydrase VA | CA5A | P35218 | Lyase | 0.259910104 |
| isorhamnetin | Beta-secretase 1 | BACE1 | P56817 | Protease | 0.259910104 |
| isorhamnetin | Tyrosine-protein kinase receptor UFO | AXL | P30530 | Kinase | 0.259910104 |
| isorhamnetin | NUAK family SNF1-like kinase 1 | NUAK1 | O60285 | Kinase | 0.259910104 |
| isorhamnetin | Aldo-keto reductase family 1 member C2 (by homology) | AKR1C2 | P52895 | Enzyme | 0.259910104 |
| isorhamnetin | Aldo-keto reductase family 1 member C1 (by homology) | AKR1C1 | Q04828 | Enzyme | 0.259910104 |
| isorhamnetin | Aldo-keto-reductase family 1 member C3 (by homology) | AKR1C3 | P42330 | Enzyme | 0.259910104 |
| isorhamnetin | Aldo-keto reductase family 1 member C4 (by homology) | AKR1C4 | P17516 | Enzyme | 0.259910104 |
| isorhamnetin | Carbonic anhydrase XIII (by homology) | CA13 | Q8N1Q1 | Lyase | 0.259910104 |
| isorhamnetin | Aldehyde reductase (by homology) | AKR1A1 | P14550 | Enzyme | 0.259910104 |
| isorhamnetin | G-protein coupled receptor 35 | GPR35 | Q9HC97 | Family A G protein-coupled receptor | 0.243267208 |
| isorhamnetin | Microtubule-associated protein tau | MAPT | P10636 | Unclassified protein | 0.201601849 |
| isorhamnetin | Lysine-specific demethylase 4D-like | KDM4E | B2RXH2 | Eraser | 0.201601849 |
| isorhamnetin | DNA topoisomerase II alpha | TOP2A | P11388 | Isomerase | 0.201601849 |
| isorhamnetin | Insulin receptor | INSR | P06213 | Kinase | 0.201601849 |
| isorhamnetin | Myosin light chain kinase, smooth muscle | MYLK | Q15746 | Kinase | 0.201601849 |
| isorhamnetin | Tyrosine-protein kinase SYK | SYK | P43405 | Kinase | 0.201601849 |
| isorhamnetin | PI3-kinase p110-gamma subunit | PIK3CG | P48736 | Enzyme | 0.201601849 |
| isorhamnetin | DNA-(apurinic or apyrimidinic site) lyase | APEX1 | P27695 | Enzyme | 0.201601849 |
| isorhamnetin | Cyclin-dependent kinase 5/CDK5 activator 1 | CDK5R1 CDK5 | Q15078 Q00535 | Kinase | 0.193269571 |
| isorhamnetin | Cyclin-dependent kinase 1/cyclin B | CCNB3 CDK1 CCNB1 CCNB2 | Q8WWL7 P06493 P14635 O95067 | Other cytosolic protein | 0.193269571 |
| isorhamnetin | Cyclin-dependent kinase 6 | CDK6 | Q00534 | Kinase | 0.193269571 |
| isorhamnetin | Cyclin-dependent kinase 2 | CDK2 | P24941 | Kinase | 0.193269571 |
| isorhamnetin | Arginase-1 (by homology) | ARG1 | P05089 | Enzyme | 0.193269571 |
| isorhamnetin | Beta amyloid A4 protein | APP | P05067 | Membrane receptor | 0.184930052 |
| isorhamnetin | Induced myeloid leukemia cell differentiation protein Mcl-1 | MCL1 | Q07820 | Other cytosolic protein | 0.134939009 |
| isorhamnetin | Telomerase reverse transcriptase | TERT | O14746 | Enzyme | 0.134939009 |
| isorhamnetin | Tyrosinase | TYR | P14679 | Oxidoreductase | 0.126610169 |
| isorhamnetin | Estradiol 17-beta-dehydrogenase 1 | HSD17B1 | P14061 | Enzyme | 0.126610169 |
| isorhamnetin | Aryl hydrocarbon receptor | AHR | P35869 | Transcription factor | 0.126610169 |
| isorhamnetin | Estrogen-related receptor alpha | ESRRA | P11474 | Nuclear receptor | 0.126610169 |
| isorhamnetin | Receptor-type tyrosine-protein phosphatase S | PTPRS | Q13332 | Phosphatase | 0.126610169 |
| isorhamnetin | Plasminogen | PLG | P00747 | Protease | 0.126610169 |
| isorhamnetin | Estrogen receptor beta | ESR2 | Q92731 | Nuclear receptor | 0.118277085 |
| isorhamnetin | DNA-3-methyladenine glycosylase | MPG | P29372 | Enzyme | 0.118277085 |
| isorhamnetin | Solute carrier family 22 member 12 | SLC22A12 | Q96S37 | Electrochemical transporter | 0.118277085 |
| isorhamnetin | Poly [ADP-ribose] polymerase-1 | PARP1 | P09874 | Enzyme | 0.10994577 |
| isorhamnetin | Transthyretin | TTR | P02766 | Secreted protein | 0.10994577 |
| isorhamnetin | Matrix metalloproteinase 12 | MMP12 | P39900 | Protease | 0.10994577 |
| isorhamnetin | Lymphocyte differentiation antigen CD38 | CD38 | P28907 | Enzyme | 0.10994577 |
| isorhamnetin | Aldo-keto reductase family 1 member B10 | AKR1B10 | O60218 | Enzyme | 0.10994577 |
| isorhamnetin | Tankyrase-2 | TNKS2 | Q9H2K2 | Enzyme | 0.10994577 |
| kaempferol | NADPH oxidase 4 | NOX4 | Q9NPH5 | Enzyme | 1 |
| kaempferol | Aldose reductase (by homology) | AKR1B1 | P15121 | Enzyme | 1 |
| kaempferol | Xanthine dehydrogenase | XDH | P47989 | Oxidoreductase | 1 |
| kaempferol | Tyrosinase | TYR | P14679 | Oxidoreductase | 1 |
| kaempferol | Tyrosine-protein kinase receptor FLT3 | FLT3 | P36888 | Kinase | 1 |
| kaempferol | Carbonic anhydrase II | CA2 | P00918 | Lyase | 1 |
| kaempferol | Arachidonate 5-lipoxygenase | ALOX5 | P09917 | Oxidoreductase | 1 |
| kaempferol | Carbonic anhydrase VII | CA7 | P43166 | Lyase | 1 |
| kaempferol | Estradiol 17-beta-dehydrogenase 2 | HSD17B2 | P37059 | Enzyme | 1 |
| kaempferol | Multidrug resistance-associated protein 1 | ABCC1 | P33527 | Primary active transporter | 1 |
| kaempferol | Estradiol 17-beta-dehydrogenase 1 | HSD17B1 | P14061 | Enzyme | 1 |
| kaempferol | Aryl hydrocarbon receptor | AHR | P35869 | Transcription factor | 1 |
| kaempferol | Carbonic anhydrase XII | CA12 | O43570 | Lyase | 1 |
| kaempferol | Estrogen-related receptor alpha | ESRRA | P11474 | Nuclear receptor | 1 |
| kaempferol | P-glycoprotein 1 | ABCB1 | P08183 | Primary active transporter | 1 |
| kaempferol | Cytochrome P450 1B1 | CYP1B1 | Q16678 | Cytochrome P450 | 1 |
| kaempferol | ATP-binding cassette sub-family G member 2 | ABCG2 | Q9UNQ0 | Primary active transporter | 1 |
| kaempferol | Adenosine A1 receptor (by homology) | ADORA1 | P30542 | Family A G protein-coupled receptor | 0.795047263 |
| kaempferol | Carbonic anhydrase IV | CA4 | P22748 | Lyase | 0.795047263 |
| kaempferol | Acetylcholinesterase | ACHE | P22303 | Hydrolase | 0.768469201 |
| kaempferol | Monoamine oxidase A | MAOA | P21397 | Oxidoreductase | 0.658019738 |
| kaempferol | Glyoxalase I | GLO1 | Q04760 | Enzyme | 0.658019738 |
| kaempferol | Tyrosine-protein kinase SYK | SYK | P43405 | Kinase | 0.658019738 |
| kaempferol | Glycogen synthase kinase-3 beta | GSK3B | P49841 | Kinase | 0.658019738 |
| kaempferol | Matrix metalloproteinase 9 | MMP9 | P14780 | Protease | 0.658019738 |
| kaempferol | Matrix metalloproteinase 2 | MMP2 | P08253 | Protease | 0.658019738 |
| kaempferol | Arachidonate 15-lipoxygenase | ALOX15 | P16050 | Enzyme | 0.64978075 |
| kaempferol | Arachidonate 12-lipoxygenase | ALOX12 | P18054 | Enzyme | 0.633326262 |
| kaempferol | Receptor-type tyrosine-protein phosphatase S | PTPRS | Q13332 | Phosphatase | 0.608446264 |
| kaempferol | Adenosine A2a receptor (by homology) | ADORA2A | P29274 | Family A G protein-coupled receptor | 0.5673019 |
| kaempferol | Cyclin-dependent kinase 5/CDK5 activator 1 | CDK5R1 CDK5 | Q15078 Q00535 | Kinase | 0.517921498 |
| kaempferol | Cyclin-dependent kinase 1/cyclin B | CCNB3 CDK1 CCNB1 CCNB2 | Q8WWL7 P06493 P14635 O95067 | Other cytosolic protein | 0.517921498 |
| kaempferol | Arginase-1 (by homology) | ARG1 | P05089 | Enzyme | 0.517921498 |
| kaempferol | G-protein coupled receptor 35 | GPR35 | Q9HC97 | Family A G protein-coupled receptor | 0.501530018 |
| kaempferol | Estrogen receptor beta | ESR2 | Q92731 | Nuclear receptor | 0.501530018 |
| kaempferol | Death-associated protein kinase 1 | DAPK1 | P53355 | Kinase | 0.501530018 |
| kaempferol | DNA-3-methyladenine glycosylase | MPG | P29372 | Enzyme | 0.501530018 |
| kaempferol | Solute carrier family 22 member 12 | SLC22A12 | Q96S37 | Electrochemical transporter | 0.501530018 |
| kaempferol | Transthyretin | TTR | P02766 | Secreted protein | 0.484896363 |
| kaempferol | Aldo-keto reductase family 1 member B10 | AKR1B10 | O60218 | Enzyme | 0.484896363 |
| kaempferol | Tankyrase-2 | TNKS2 | Q9H2K2 | Enzyme | 0.484896363 |
| kaempferol | Tankyrase-1 | TNKS | O95271 | Enzyme | 0.484896363 |
| kaempferol | Cyclin-dependent kinase 6 | CDK6 | Q00534 | Kinase | 0.476835618 |
| kaempferol | Cyclin-dependent kinase 2 | CDK2 | P24941 | Kinase | 0.476835618 |
| kaempferol | Cytochrome P450 19A1 | CYP19A1 | P11511 | Cytochrome P450 | 0.427205275 |
| kaempferol | Casein kinase II alpha | CSNK2A1 | P68400 | Kinase | 0.427205275 |
| kaempferol | Epidermal growth factor receptor erbB1 | EGFR | P00533 | Kinase | 0.40264338 |
| kaempferol | Vasopressin V2 receptor | AVPR2 | P30518 | Family A G protein-coupled receptor | 0.40264338 |
| kaempferol | Insulin-like growth factor I receptor | IGF1R | P08069 | Kinase | 0.40264338 |
| kaempferol | Thrombin | F2 | P00734 | Protease | 0.40264338 |
| kaempferol | Serine/threonine-protein kinase PIM1 | PIM1 | P11309 | Kinase | 0.40264338 |
| kaempferol | Serine/threonine-protein kinase Aurora-B | AURKB | Q96GD4 | Kinase | 0.40264338 |
| kaempferol | Dopamine D4 receptor | DRD4 | P21917 | Family A G protein-coupled receptor | 0.40264338 |
| kaempferol | Myeloperoxidase | MPO | P05164 | Enzyme | 0.40264338 |
| kaempferol | PI3-kinase p85-alpha subunit | PIK3R1 | P27986 | Enzyme | 0.40264338 |
| kaempferol | Liver glycogen phosphorylase | PYGL | P06737 | Enzyme | 0.40264338 |
| kaempferol | Carbonic anhydrase I | CA1 | P00915 | Lyase | 0.40264338 |
| kaempferol | Tyrosine-protein kinase SRC | SRC | P12931 | Kinase | 0.40264338 |
| kaempferol | Focal adhesion kinase 1 | PTK2 | Q05397 | Kinase | 0.40264338 |
| kaempferol | Vascular endothelial growth factor receptor 2 | KDR | P35968 | Kinase | 0.40264338 |
| kaempferol | Matrix metalloproteinase 13 | MMP13 | P45452 | Protease | 0.40264338 |
| kaempferol | Matrix metalloproteinase 3 | MMP3 | P08254 | Protease | 0.40264338 |
| kaempferol | Carbonic anhydrase III | CA3 | P07451 | Lyase | 0.40264338 |
| kaempferol | Serine/threonine-protein kinase PLK1 | PLK1 | P53350 | Kinase | 0.40264338 |
| kaempferol | Carbonic anhydrase VI | CA6 | P23280 | Lyase | 0.40264338 |
| kaempferol | Cyclin-dependent kinase 1 | CDK1 | P06493 | Kinase | 0.40264338 |
| kaempferol | Protein kinase N1 | PKN1 | Q16512 | Kinase | 0.40264338 |
| kaempferol | Carbonic anhydrase XIV | CA14 | Q9ULX7 | Lyase | 0.40264338 |
| kaempferol | Carbonic anhydrase IX | CA9 | Q16790 | Lyase | 0.40264338 |
| kaempferol | Hepatocyte growth factor receptor | MET | P08581 | Kinase | 0.40264338 |
| kaempferol | Serine/threonine-protein kinase NEK2 | NEK2 | P51955 | Kinase | 0.40264338 |
| kaempferol | Interleukin-8 receptor A | CXCR1 | P25024 | Family A G protein-coupled receptor | 0.40264338 |
| kaempferol | CaM kinase II beta | CAMK2B | Q13554 | Kinase | 0.40264338 |
| kaempferol | ALK tyrosine kinase receptor | ALK | Q9UM73 | Kinase | 0.40264338 |
| kaempferol | Serine/threonine-protein kinase AKT | AKT1 | P31749 | Kinase | 0.40264338 |
| kaempferol | Serine/threonine-protein kinase NEK6 | NEK6 | Q9HC98 | Kinase | 0.40264338 |
| kaempferol | Phospholipase A2 group 1B | PLA2G1B | P04054 | Enzyme | 0.40264338 |
| kaempferol | Carbonic anhydrase VA | CA5A | P35218 | Lyase | 0.40264338 |
| kaempferol | Beta-secretase 1 | BACE1 | P56817 | Protease | 0.40264338 |
| kaempferol | Tyrosine-protein kinase receptor UFO | AXL | P30530 | Kinase | 0.40264338 |
| kaempferol | NUAK family SNF1-like kinase 1 | NUAK1 | O60285 | Kinase | 0.40264338 |
| kaempferol | Aldo-keto reductase family 1 member C2 (by homology) | AKR1C2 | P52895 | Enzyme | 0.40264338 |
| kaempferol | Aldo-keto reductase family 1 member C1 (by homology) | AKR1C1 | Q04828 | Enzyme | 0.40264338 |
| kaempferol | Aldo-keto-reductase family 1 member C3 (by homology) | AKR1C3 | P42330 | Enzyme | 0.40264338 |
| kaempferol | Aldo-keto reductase family 1 member C4 (by homology) | AKR1C4 | P17516 | Enzyme | 0.40264338 |
| kaempferol | Carbonic anhydrase XIII (by homology) | CA13 | Q8N1Q1 | Lyase | 0.40264338 |
| kaempferol | Aldehyde reductase (by homology) | AKR1A1 | P14550 | Enzyme | 0.40264338 |
| kaempferol | Beta amyloid A4 protein | APP | P05067 | Membrane receptor | 0.295453305 |
| kaempferol | Poly [ADP-ribose] polymerase-1 | PARP1 | P09874 | Enzyme | 0.295453305 |
| kaempferol | Matrix metalloproteinase 12 | MMP12 | P39900 | Protease | 0.295453305 |
| kaempferol | Lymphocyte differentiation antigen CD38 | CD38 | P28907 | Enzyme | 0.295453305 |
| kaempferol | DNA topoisomerase I (by homology) | TOP1 | P11387 | Isomerase | 0.295453305 |
| kaempferol | Estrogen receptor alpha | ESR1 | P03372 | Nuclear receptor | 0.270836923 |
| kaempferol | Cyclooxygenase-2 | PTGS2 | P35354 | Oxidoreductase | 0.270836923 |
| kaempferol | Cystic fibrosis transmembrane conductance regulator | CFTR | P13569 | Other ion channel | 0.270836923 |
| kaempferol | 6-phosphofructo-2-kinase/fructose-2,6-bisphosphatase 3 | PFKFB3 | Q16875 | Enzyme | 0.262581506 |
| kaempferol | AMY1C | AMY1A | P04745 | Enzyme | 0.237885168 |
| kaempferol | G protein-coupled receptor kinase 6 | GRK6 | P43250 | Kinase | 0.237885168 |
| kaempferol | Telomerase reverse transcriptase | TERT | O14746 | Enzyme | 0.229685699 |
| kaempferol | Microtubule-associated protein tau | MAPT | P10636 | Unclassified protein | 0.171978589 |
| luteolin | NADPH oxidase 4 | NOX4 | Q9NPH5 | Enzyme | 1 |
| luteolin | Aldose reductase | AKR1B1 | P15121 | Enzyme | 1 |
| luteolin | Cyclin-dependent kinase 5/CDK5 activator 1 | CDK5R1 CDK5 | Q15078 Q00535 | Kinase | 1 |
| luteolin | Xanthine dehydrogenase | XDH | P47989 | Oxidoreductase | 1 |
| luteolin | Monoamine oxidase A | MAOA | P21397 | Oxidoreductase | 1 |
| luteolin | Tyrosine-protein kinase receptor FLT3 | FLT3 | P36888 | Kinase | 1 |
| luteolin | Carbonic anhydrase II | CA2 | P00918 | Lyase | 1 |
| luteolin | Cyclin-dependent kinase 1/cyclin B | CCNB3 CDK1 CCNB1 CCNB2 | Q8WWL7 P06493 P14635 O95067 | Other cytosolic protein | 1 |
| luteolin | Arachidonate 5-lipoxygenase | ALOX5 | P09917 | Oxidoreductase | 1 |
| luteolin | Adenosine A1 receptor (by homology) | ADORA1 | P30542 | Family A G protein-coupled receptor | 1 |
| luteolin | Carbonic anhydrase VII | CA7 | P43166 | Lyase | 1 |
| luteolin | Glyoxalase I | GLO1 | Q04760 | Enzyme | 1 |
| luteolin | Beta amyloid A4 protein | APP | P05067 | Membrane receptor | 1 |
| luteolin | Tyrosine-protein kinase SYK | SYK | P43405 | Kinase | 1 |
| luteolin | Glycogen synthase kinase-3 beta | GSK3B | P49841 | Kinase | 1 |
| luteolin | Poly [ADP-ribose] polymerase-1 | PARP1 | P09874 | Enzyme | 1 |
| luteolin | Transthyretin | TTR | P02766 | Secreted protein | 1 |
| luteolin | Matrix metalloproteinase 9 | MMP9 | P14780 | Protease | 1 |
| luteolin | Carbonic anhydrase XII | CA12 | O43570 | Lyase | 1 |
| luteolin | Matrix metalloproteinase 2 | MMP2 | P08253 | Protease | 1 |
| luteolin | Carbonic anhydrase IV | CA4 | P22748 | Lyase | 1 |
| luteolin | Matrix metalloproteinase 12 | MMP12 | P39900 | Protease | 1 |
| luteolin | Lymphocyte differentiation antigen CD38 | CD38 | P28907 | Enzyme | 1 |
| luteolin | Cytochrome P450 1B1 | CYP1B1 | Q16678 | Cytochrome P450 | 1 |
| luteolin | ATP-binding cassette sub-family G member 2 | ABCG2 | Q9UNQ0 | Primary active transporter | 1 |
| luteolin | Aldo-keto reductase family 1 member B10 | AKR1B10 | O60218 | Enzyme | 1 |
| luteolin | Tankyrase-2 | TNKS2 | Q9H2K2 | Enzyme | 1 |
| luteolin | Tankyrase-1 | TNKS | O95271 | Enzyme | 1 |
| luteolin | DNA topoisomerase I (by homology) | TOP1 | P11387 | Isomerase | 1 |
| luteolin | Arginase-1 (by homology) | ARG1 | P05089 | Enzyme | 1 |
| luteolin | Receptor-type tyrosine-protein phosphatase S | PTPRS | Q13332 | Phosphatase | 0.857022738 |
| luteolin | Multidrug resistance-associated protein 1 | ABCC1 | P33527 | Primary active transporter | 0.658019738 |
| luteolin | Estradiol 17-beta-dehydrogenase 1 | HSD17B1 | P14061 | Enzyme | 0.658019738 |
| luteolin | Acetylcholinesterase | ACHE | P22303 | Hydrolase | 0.6004118 |
| luteolin | Cyclin-dependent kinase 6 | CDK6 | Q00534 | Kinase | 0.6004118 |
| luteolin | P-glycoprotein 1 | ABCB1 | P08183 | Primary active transporter | 0.534504957 |
| luteolin | Estradiol 17-beta-dehydrogenase 2 | HSD17B2 | P37059 | Enzyme | 0.468552736 |
| luteolin | Cytochrome P450 19A1 | CYP19A1 | P11511 | Cytochrome P450 | 0.460288742 |
| luteolin | Estrogen receptor beta | ESR2 | Q92731 | Nuclear receptor | 0.460288742 |
| luteolin | Adenosine A2a receptor (by homology) | ADORA2A | P29274 | Family A G protein-coupled receptor | 0.460288742 |
| luteolin | Casein kinase II alpha | CSNK2A1 | P68400 | Kinase | 0.460288742 |
| luteolin | Arachidonate 15-lipoxygenase | ALOX15 | P16050 | Enzyme | 0.435520295 |
| luteolin | Arachidonate 12-lipoxygenase | ALOX12 | P18054 | Enzyme | 0.435520295 |
| luteolin | Estrogen receptor alpha | ESR1 | P03372 | Nuclear receptor | 0.386211984 |
| luteolin | Cyclooxygenase-2 | PTGS2 | P35354 | Oxidoreductase | 0.386211984 |
| luteolin | Cystic fibrosis transmembrane conductance regulator | CFTR | P13569 | Other ion channel | 0.386211984 |
| luteolin | AMY1C | AMY1A | P04745 | Enzyme | 0.361228277 |
| luteolin | G protein-coupled receptor kinase 6 | GRK6 | P43250 | Kinase | 0.361228277 |
| luteolin | Carbonic anhydrase I | CA1 | P00915 | Lyase | 0.336739633 |
| luteolin | Carbonic anhydrase IX | CA9 | Q16790 | Lyase | 0.336739633 |
| luteolin | Cyclin-dependent kinase 2 | CDK2 | P24941 | Kinase | 0.328395696 |
| luteolin | Telomerase reverse transcriptase | TERT | O14746 | Enzyme | 0.320218721 |
| luteolin | Cyclin-dependent kinase 1 | CDK1 | P06493 | Kinase | 0.303816095 |
| luteolin | Tyrosinase | TYR | P14679 | Oxidoreductase | 0.287307298 |
| luteolin | Aryl hydrocarbon receptor | AHR | P35869 | Transcription factor | 0.287307298 |
| luteolin | Estrogen-related receptor alpha | ESRRA | P11474 | Nuclear receptor | 0.287307298 |
| luteolin | G-protein coupled receptor 35 | GPR35 | Q9HC97 | Family A G protein-coupled receptor | 0.279037062 |
| luteolin | Vasopressin V2 receptor | AVPR2 | P30518 | Family A G protein-coupled receptor | 0.279037062 |
| luteolin | Insulin-like growth factor I receptor | IGF1R | P08069 | Kinase | 0.279037062 |
| luteolin | Epidermal growth factor receptor erbB1 | EGFR | P00533 | Kinase | 0.279037062 |
| luteolin | Thrombin | F2 | P00734 | Protease | 0.279037062 |
| luteolin | Serine/threonine-protein kinase PIM1 | PIM1 | P11309 | Kinase | 0.279037062 |
| luteolin | Serine/threonine-protein kinase Aurora-B | AURKB | Q96GD4 | Kinase | 0.279037062 |
| luteolin | Dopamine D4 receptor | DRD4 | P21917 | Family A G protein-coupled receptor | 0.279037062 |
| luteolin | Myeloperoxidase | MPO | P05164 | Enzyme | 0.279037062 |
| luteolin | PI3-kinase p85-alpha subunit | PIK3R1 | P27986 | Enzyme | 0.279037062 |
| luteolin | Death-associated protein kinase 1 | DAPK1 | P53355 | Kinase | 0.279037062 |
| luteolin | Liver glycogen phosphorylase | PYGL | P06737 | Enzyme | 0.279037062 |
| luteolin | Tyrosine-protein kinase SRC | SRC | P12931 | Kinase | 0.279037062 |
| luteolin | Focal adhesion kinase 1 | PTK2 | Q05397 | Kinase | 0.279037062 |
| luteolin | Vascular endothelial growth factor receptor 2 | KDR | P35968 | Kinase | 0.279037062 |
| luteolin | Matrix metalloproteinase 13 | MMP13 | P45452 | Protease | 0.279037062 |
| luteolin | Matrix metalloproteinase 3 | MMP3 | P08254 | Protease | 0.279037062 |
| luteolin | Carbonic anhydrase III | CA3 | P07451 | Lyase | 0.279037062 |
| luteolin | Serine/threonine-protein kinase PLK1 | PLK1 | P53350 | Kinase | 0.279037062 |
| luteolin | Carbonic anhydrase VI | CA6 | P23280 | Lyase | 0.279037062 |
| luteolin | Protein kinase N1 | PKN1 | Q16512 | Kinase | 0.279037062 |
| luteolin | Carbonic anhydrase XIV | CA14 | Q9ULX7 | Lyase | 0.279037062 |
| luteolin | Hepatocyte growth factor receptor | MET | P08581 | Kinase | 0.279037062 |
| luteolin | Serine/threonine-protein kinase NEK2 | NEK2 | P51955 | Kinase | 0.279037062 |
| luteolin | Interleukin-8 receptor A | CXCR1 | P25024 | Family A G protein-coupled receptor | 0.279037062 |
| luteolin | CaM kinase II beta | CAMK2B | Q13554 | Kinase | 0.279037062 |
| luteolin | ALK tyrosine kinase receptor | ALK | Q9UM73 | Kinase | 0.279037062 |
| luteolin | Serine/threonine-protein kinase AKT | AKT1 | P31749 | Kinase | 0.279037062 |
| luteolin | Serine/threonine-protein kinase NEK6 | NEK6 | Q9HC98 | Kinase | 0.279037062 |
| luteolin | Phospholipase A2 group 1B | PLA2G1B | P04054 | Enzyme | 0.279037062 |
| luteolin | Carbonic anhydrase VA | CA5A | P35218 | Lyase | 0.279037062 |
| luteolin | Beta-secretase 1 | BACE1 | P56817 | Protease | 0.279037062 |
| luteolin | Tyrosine-protein kinase receptor UFO | AXL | P30530 | Kinase | 0.279037062 |
| luteolin | NUAK family SNF1-like kinase 1 | NUAK1 | O60285 | Kinase | 0.279037062 |
| luteolin | Aldo-keto reductase family 1 member C2 (by homology) | AKR1C2 | P52895 | Enzyme | 0.279037062 |
| luteolin | Aldo-keto reductase family 1 member C1 (by homology) | AKR1C1 | Q04828 | Enzyme | 0.279037062 |
| luteolin | Aldo-keto-reductase family 1 member C3 (by homology) | AKR1C3 | P42330 | Enzyme | 0.279037062 |
| luteolin | Aldo-keto reductase family 1 member C4 (by homology) | AKR1C4 | P17516 | Enzyme | 0.279037062 |
| luteolin | Carbonic anhydrase XIII (by homology) | CA13 | Q8N1Q1 | Lyase | 0.279037062 |
| luteolin | Aldehyde reductase (by homology) | AKR1A1 | P14550 | Enzyme | 0.279037062 |
| luteolin | 6-phosphofructo-2-kinase/fructose-2,6-bisphosphatase 3 | PFKFB3 | Q16875 | Enzyme | 0.147256737 |
| luteolin | Plasminogen | PLG | P00747 | Protease | 0.147256737 |
| luteolin | Lysine-specific demethylase 4D-like | KDM4E | B2RXH2 | Eraser | 0.147256737 |
| luteolin | Androgen Receptor | AR | P10275 | Nuclear receptor | 0.139061947 |
| naringenin | Cytochrome P450 19A1 | CYP19A1 | P11511 | Cytochrome P450 | 0.912946448 |
| naringenin | Carbonic anhydrase VII | CA7 | P43166 | Lyase | 0.912946448 |
| naringenin | Multidrug resistance-associated protein 1 | ABCC1 | P33527 | Primary active transporter | 0.912946448 |
| naringenin | Estradiol 17-beta-dehydrogenase 1 | HSD17B1 | P14061 | Enzyme | 0.912946448 |
| naringenin | Carbonic anhydrase XII | CA12 | O43570 | Lyase | 0.912946448 |
| naringenin | Testis-specific androgen-binding protein | SHBG | P04278 | Secreted protein | 0.912946448 |
| naringenin | Carbonic anhydrase IV | CA4 | P22748 | Lyase | 0.912946448 |
| naringenin | Cytochrome P450 1B1 | CYP1B1 | Q16678 | Cytochrome P450 | 0.912946448 |
| naringenin | Carbonyl reductase [NADPH] 1 | CBR1 | P16152 | Enzyme | 0.912946448 |
| naringenin | Estrogen receptor alpha | ESR1 | P03372 | Nuclear receptor | 0.583885792 |
| naringenin | Estrogen receptor beta | ESR2 | Q92731 | Nuclear receptor | 0.583885792 |
| naringenin | Cyclooxygenase-1 | PTGS1 | P23219 | Oxidoreductase | 0.428280861 |
| naringenin | Monoamine oxidase B | MAOB | P27338 | Oxidoreductase | 0.362674719 |
| naringenin | Adenosine A1 receptor | ADORA1 | P30542 | Family A G protein-coupled receptor | 0.166097445 |
| naringenin | Adenosine A3 receptor | ADORA3 | P0DMS8 | Family A G protein-coupled receptor | 0.141522086 |
| naringenin | ATP-binding cassette sub-family G member 2 | ABCG2 | Q9UNQ0 | Primary active transporter | 0.125142649 |
| naringenin | Taste receptor type 2 member 31 | TAS2R31 | P59538 | Taste family G protein-coupled receptor | 0.125142649 |
| naringenin | Aldo-keto-reductase family 1 member C3 | AKR1C3 | P42330 | Enzyme | 0.125142649 |
| naringenin | Phospholipase A2 group 1B | PLA2G1B | P04054 | Enzyme | 0.116965063 |
| naringenin | Metabotropic glutamate receptor 5 | GRM5 | P41594 | Family C G protein-coupled receptor | 0.116965063 |
| naringenin | Acyl coenzyme A:cholesterol acyltransferase | CES1 | P23141 | Enzyme | 0.108770969 |
| naringenin | Peroxisome proliferator-activated receptor gamma | PPARG | P37231 | Nuclear receptor | 0.108770969 |
| naringenin | Carboxylesterase 2 | CES2 | O00748 | Enzyme | 0.108770969 |
| naringenin | Sodium/glucose cotransporter 2 | SLC5A2 | P31639 | Electrochemical transporter | 0.100578902 |
| naringenin | Matrix metalloproteinase 12 | MMP12 | P39900 | Protease | 0.100578902 |
| naringenin | DNA polymerase beta (by homology) | POLB | P06746 | Enzyme | 0.100578902 |
| naringenin | Matrix metalloproteinase 13 | MMP13 | P45452 | Protease | 0.100578902 |
| naringenin | Phospholipase A2 group IIA | PLA2G2A | P14555 | Enzyme | 0.100578902 |
| naringenin | Phospholipase A2 group V | PLA2G5 | P39877 | Enzyme | 0.100578902 |
| naringenin | Group X secretory phospholipase A2 | PLA2G10 | O15496 | Enzyme | 0.100578902 |
| naringenin | Beta-secretase 1 | BACE1 | P56817 | Protease | 0.100578902 |
| naringenin | Neuronal acetylcholine receptor protein alpha-7 subunit | CHRNA7 | P36544 | Ligand-gated ion channel | 0.100578902 |
| naringenin | Kallikrein 1 | KLK1 | P06870 | Protease | 0.100578902 |
| naringenin | Kallikrein 2 | KLK2 | P20151 | Protease | 0.100578902 |
| naringenin | Retinoid X receptor alpha | RXRA | P19793 | Nuclear receptor | 0.100578902 |
| naringenin | Plasminogen activator inhibitor-1 | SERPINE1 | P05121 | Secreted protein | 0.100578902 |
| naringenin | Tyrosine-protein kinase SRC | SRC | P12931 | Kinase | 0.100578902 |
| naringenin | Carbonic anhydrase II | CA2 | P00918 | Lyase | 0.100578902 |
| naringenin | Carbonic anhydrase I | CA1 | P00915 | Lyase | 0.100578902 |
| naringenin | 17-beta-hydroxysteroid dehydrogenase 14 | HSD17B14 | Q9BPX1 | Enzyme | 0.100578902 |
| naringenin | Stem cell growth factor receptor | KIT | P10721 | Kinase | 0.100578902 |
| naringenin | Vascular endothelial growth factor receptor 2 | KDR | P35968 | Kinase | 0.100578902 |
| naringenin | Fibroblast growth factor receptor 1 | FGFR1 | P11362 | Kinase | 0.100578902 |
| naringenin | Hepatocyte growth factor receptor | MET | P08581 | Kinase | 0.100578902 |
| naringenin | Carbonic anhydrase III | CA3 | P07451 | Lyase | 0.100578902 |
| naringenin | Carbonic anhydrase VI | CA6 | P23280 | Lyase | 0.100578902 |
| naringenin | Carbonic anhydrase XIII | CA13 | Q8N1Q1 | Lyase | 0.100578902 |
| naringenin | Carbonic anhydrase VB | CA5B | Q9Y2D0 | Lyase | 0.100578902 |
| naringenin | Carbonic anhydrase VA | CA5A | P35218 | Lyase | 0.100578902 |
| naringenin | Quinone reductase 2 | NQO2 | P16083 | Enzyme | 0.100578902 |
| naringenin | Cathepsin (B and K) | CTSB | P07858 | Protease | 0.100578902 |
| naringenin | NADPH oxidase 4 | NOX4 | Q9NPH5 | Enzyme | 0.100578902 |
| naringenin | Aldose reductase | AKR1B1 | P15121 | Enzyme | 0.100578902 |
| naringenin | Dual specificty protein kinase CLK1 | CLK1 | P49759 | Kinase | 0.100578902 |
| naringenin | Dual specificity tyrosine-phosphorylation-regulated kinase 1B | DYRK1B | Q9Y463 | Kinase | 0.100578902 |
| naringenin | Butyrylcholinesterase | BCHE | P06276 | Hydrolase | 0.100578902 |
| naringenin | Carbonic anhydrase IX | CA9 | Q16790 | Lyase | 0.100578902 |
| naringenin | Estrogen-related receptor alpha | ESRRA | P11474 | Nuclear receptor | 0.100578902 |
| naringenin | Estrogen-related receptor beta | ESRRB | O95718 | Nuclear receptor | 0.100578902 |
| naringenin | Cyclin-dependent kinase 5/CDK5 activator 1 | CDK5R1 CDK5 | Q15078 Q00535 | Kinase | 0.100578902 |
| naringenin | Insulin-like growth factor I receptor | IGF1R | P08069 | Kinase | 0.100578902 |
| naringenin | Insulin receptor | INSR | P06213 | Kinase | 0.100578902 |
| naringenin | Dual-specificity tyrosine-phosphorylation regulated kinase 1A | DYRK1A | Q13627 | Kinase | 0.100578902 |
| naringenin | Estradiol 17-beta-dehydrogenase 2 | HSD17B2 | P37059 | Enzyme | 0.100578902 |
| naringenin | Insulin-like growth factor binding protein 3 | IGFBP3 | P17936 | Secreted protein | 0.100578902 |
| naringenin | Matrix metalloproteinase 2 | MMP2 | P08253 | Protease | 0.100578902 |
| naringenin | 14-3-3 protein gamma | YWHAG | P61981 | Unclassified protein | 0.100578902 |
| naringenin | NAD-dependent deacetylase sirtuin 2 | SIRT2 | Q8IXJ6 | Eraser | 0.100578902 |
| naringenin | Coagulation factor VII/tissue factor | F3 | P13726 | Surface antigen | 0.100578902 |
| naringenin | Prostanoid EP1 receptor | PTGER1 | P34995 | Family A G protein-coupled receptor | 0.100578902 |
| naringenin | Prostanoid EP2 receptor | PTGER2 | P43116 | Family A G protein-coupled receptor | 0.100578902 |
| naringenin | Prostanoid EP3 receptor | PTGER3 | P43115 | Family A G protein-coupled receptor | 0.100578902 |
| naringenin | Apoptosis regulator Bcl-X | BCL2L1 | Q07817 | Other ion channel | 0.100578902 |
| naringenin | PI3-kinase p110-beta subunit | PIK3CB | P42338 | Enzyme | 0.100578902 |
| naringenin | Cytochrome P450 2C9 | CYP2C9 | P11712 | Cytochrome P450 | 0.100578902 |
| naringenin | Cytochrome P450 3A4 | CYP3A4 | P08684 | Cytochrome P450 | 0.100578902 |
| naringenin | PI3-kinase p110-alpha subunit | PIK3CA | P42336 | Enzyme | 0.100578902 |
| naringenin | Transitional endoplasmic reticulum ATPase | VCP | P55072 | Primary active transporter | 0.100578902 |
| naringenin | Placenta growth factor | PGF | P49763 | Unclassified protein | 0.100578902 |
| naringenin | Vascular endothelial growth factor A | VEGFA | P15692 | Secreted protein | 0.100578902 |
| naringenin | Endothelin receptor ET-A | EDNRA | P25101 | Family A G protein-coupled receptor | 0.100578902 |
| naringenin | Serine/threonine-protein kinase/endoribonuclease IRE1 | ERN1 | O75460 | Enzyme | 0.100578902 |
| naringenin | Matrix metalloproteinase 3 | MMP3 | P08254 | Protease | 0.100578902 |
| naringenin | Beta amyloid A4 protein | APP | P05067 | Membrane receptor | 0.100578902 |
| naringenin | Glycogen synthase kinase-3 beta | GSK3B | P49841 | Kinase | 0.100578902 |
| naringenin | Apoptosis regulator Bcl-2 | BCL2 | P10415 | Other ion channel | 0.100578902 |
| naringenin | Matrix metalloproteinase 9 | MMP9 | P14780 | Protease | 0.100578902 |
| naringenin | Serine/threonine-protein kinase WEE1 | WEE1 | P30291 | Kinase | 0.100578902 |
| naringenin | Tyrosine-protein kinase LCK | LCK | P06239 | Kinase | 0.100578902 |
| naringenin | Tyrosine-protein kinase SYK | SYK | P43405 | Kinase | 0.100578902 |
| naringenin | Cyclin-dependent kinase 2/cyclin E1 | CCNE1 CDK2 | P24864 P24941 | Kinase | 0.100578902 |
| naringenin | CDK3/Cyclin E | CCNE1 CDK3 | P24864 Q00526 | Kinase | 0.100578902 |
| naringenin | Cyclin-dependent kinase 4 | CDK4 | P11802 | Kinase | 0.100578902 |
| naringenin | Serine/threonine-protein kinase Aurora-A | AURKA | O14965 | Kinase | 0.100578902 |
| naringenin | Alpha-synuclein | SNCA | P37840 | Unclassified protein | 0.100578902 |
| naringenin | Arachidonate 12-lipoxygenase | ALOX12 | P18054 | Enzyme | 0.100578902 |
| naringenin | Hepatocyte nuclear factor 4-alpha | HNF4A | P41235 | Unclassified protein | 0.100578902 |
| quercetin | NADPH oxidase 4 | NOX4 | Q9NPH5 | Enzyme | 1 |
| quercetin | Vasopressin V2 receptor | AVPR2 | P30518 | Family A G protein-coupled receptor | 1 |
| quercetin | Aldose reductase | AKR1B1 | P15121 | Enzyme | 1 |
| quercetin | Xanthine dehydrogenase | XDH | P47989 | Oxidoreductase | 1 |
| quercetin | Monoamine oxidase A | MAOA | P21397 | Oxidoreductase | 1 |
| quercetin | Insulin-like growth factor I receptor | IGF1R | P08069 | Kinase | 1 |
| quercetin | Tyrosine-protein kinase receptor FLT3 | FLT3 | P36888 | Kinase | 1 |
| quercetin | Cytochrome P450 19A1 | CYP19A1 | P11511 | Cytochrome P450 | 1 |
| quercetin | Epidermal growth factor receptor erbB1 | EGFR | P00533 | Kinase | 1 |
| quercetin | Thrombin | F2 | P00734 | Protease | 1 |
| quercetin | Carbonic anhydrase II | CA2 | P00918 | Lyase | 1 |
| quercetin | Serine/threonine-protein kinase PIM1 | PIM1 | P11309 | Kinase | 1 |
| quercetin | Arachidonate 5-lipoxygenase | ALOX5 | P09917 | Oxidoreductase | 1 |
| quercetin | Serine/threonine-protein kinase Aurora-B | AURKB | Q96GD4 | Kinase | 1 |
| quercetin | Dopamine D4 receptor | DRD4 | P21917 | Family A G protein-coupled receptor | 1 |
| quercetin | Adenosine A1 receptor (by homology) | ADORA1 | P30542 | Family A G protein-coupled receptor | 1 |
| quercetin | Carbonic anhydrase VII | CA7 | P43166 | Lyase | 1 |
| quercetin | Glyoxalase I | GLO1 | Q04760 | Enzyme | 1 |
| quercetin | Myeloperoxidase | MPO | P05164 | Enzyme | 1 |
| quercetin | PI3-kinase p85-alpha subunit | PIK3R1 | P27986 | Enzyme | 1 |
| quercetin | Adenosine A2a receptor (by homology) | ADORA2A | P29274 | Family A G protein-coupled receptor | 1 |
| quercetin | Death-associated protein kinase 1 | DAPK1 | P53355 | Kinase | 1 |
| quercetin | Liver glycogen phosphorylase | PYGL | P06737 | Enzyme | 1 |
| quercetin | Carbonic anhydrase I | CA1 | P00915 | Lyase | 1 |
| quercetin | Glycogen synthase kinase-3 beta | GSK3B | P49841 | Kinase | 1 |
| quercetin | Tyrosine-protein kinase SRC | SRC | P12931 | Kinase | 1 |
| quercetin | Focal adhesion kinase 1 | PTK2 | Q05397 | Kinase | 1 |
| quercetin | Estradiol 17-beta-dehydrogenase 2 | HSD17B2 | P37059 | Enzyme | 1 |
| quercetin | Vascular endothelial growth factor receptor 2 | KDR | P35968 | Kinase | 1 |
| quercetin | Matrix metalloproteinase 13 | MMP13 | P45452 | Protease | 1 |
| quercetin | Matrix metalloproteinase 3 | MMP3 | P08254 | Protease | 1 |
| quercetin | Carbonic anhydrase III | CA3 | P07451 | Lyase | 1 |
| quercetin | Arachidonate 15-lipoxygenase | ALOX15 | P16050 | Enzyme | 1 |
| quercetin | Multidrug resistance-associated protein 1 | ABCC1 | P33527 | Primary active transporter | 1 |
| quercetin | Serine/threonine-protein kinase PLK1 | PLK1 | P53350 | Kinase | 1 |
| quercetin | Carbonic anhydrase VI | CA6 | P23280 | Lyase | 1 |
| quercetin | Cyclin-dependent kinase 1 | CDK1 | P06493 | Kinase | 1 |
| quercetin | Matrix metalloproteinase 9 | MMP9 | P14780 | Protease | 1 |
| quercetin | Carbonic anhydrase XII | CA12 | O43570 | Lyase | 1 |
| quercetin | Matrix metalloproteinase 2 | MMP2 | P08253 | Protease | 1 |
| quercetin | Protein kinase N1 | PKN1 | Q16512 | Kinase | 1 |
| quercetin | Carbonic anhydrase XIV | CA14 | Q9ULX7 | Lyase | 1 |
| quercetin | Carbonic anhydrase IX | CA9 | Q16790 | Lyase | 1 |
| quercetin | Casein kinase II alpha | CSNK2A1 | P68400 | Kinase | 1 |
| quercetin | Arachidonate 12-lipoxygenase | ALOX12 | P18054 | Enzyme | 1 |
| quercetin | Hepatocyte growth factor receptor | MET | P08581 | Kinase | 1 |
| quercetin | Carbonic anhydrase IV | CA4 | P22748 | Lyase | 1 |
| quercetin | Serine/threonine-protein kinase NEK2 | NEK2 | P51955 | Kinase | 1 |
| quercetin | Interleukin-8 receptor A | CXCR1 | P25024 | Family A G protein-coupled receptor | 1 |
| quercetin | CaM kinase II beta | CAMK2B | Q13554 | Kinase | 1 |
| quercetin | ALK tyrosine kinase receptor | ALK | Q9UM73 | Kinase | 1 |
| quercetin | Serine/threonine-protein kinase AKT | AKT1 | P31749 | Kinase | 1 |
| quercetin | P-glycoprotein 1 | ABCB1 | P08183 | Primary active transporter | 1 |
| quercetin | Serine/threonine-protein kinase NEK6 | NEK6 | Q9HC98 | Kinase | 1 |
| quercetin | Phospholipase A2 group 1B | PLA2G1B | P04054 | Enzyme | 1 |
| quercetin | Carbonic anhydrase VA | CA5A | P35218 | Lyase | 1 |
| quercetin | Beta-secretase 1 | BACE1 | P56817 | Protease | 1 |
| quercetin | Cytochrome P450 1B1 | CYP1B1 | Q16678 | Cytochrome P450 | 1 |
| quercetin | Tyrosine-protein kinase receptor UFO | AXL | P30530 | Kinase | 1 |
| quercetin | ATP-binding cassette sub-family G member 2 | ABCG2 | Q9UNQ0 | Primary active transporter | 1 |
| quercetin | NUAK family SNF1-like kinase 1 | NUAK1 | O60285 | Kinase | 1 |
| quercetin | Aldo-keto reductase family 1 member C2 (by homology) | AKR1C2 | P52895 | Enzyme | 1 |
| quercetin | Aldo-keto reductase family 1 member C1 (by homology) | AKR1C1 | Q04828 | Enzyme | 1 |
| quercetin | Aldo-keto-reductase family 1 member C3 (by homology) | AKR1C3 | P42330 | Enzyme | 1 |
| quercetin | Aldo-keto reductase family 1 member C4 (by homology) | AKR1C4 | P17516 | Enzyme | 1 |
| quercetin | Carbonic anhydrase XIII (by homology) | CA13 | Q8N1Q1 | Lyase | 1 |
| quercetin | Aldehyde reductase (by homology) | AKR1A1 | P14550 | Enzyme | 1 |
| quercetin | G-protein coupled receptor 35 | GPR35 | Q9HC97 | Family A G protein-coupled receptor | 1 |
| quercetin | Microtubule-associated protein tau | MAPT | P10636 | Unclassified protein | 0.680283592 |
| quercetin | Lysine-specific demethylase 4D-like | KDM4E | B2RXH2 | Eraser | 0.680283592 |
| quercetin | DNA topoisomerase II alpha | TOP2A | P11388 | Isomerase | 0.680283592 |
| quercetin | Insulin receptor | INSR | P06213 | Kinase | 0.680283592 |
| quercetin | Acetylcholinesterase | ACHE | P22303 | Hydrolase | 0.680283592 |
| quercetin | Myosin light chain kinase, smooth muscle | MYLK | Q15746 | Kinase | 0.680283592 |
| quercetin | Tyrosine-protein kinase SYK | SYK | P43405 | Kinase | 0.680283592 |
| quercetin | PI3-kinase p110-gamma subunit | PIK3CG | P48736 | Enzyme | 0.680283592 |
| quercetin | DNA-(apurinic or apyrimidinic site) lyase | APEX1 | P27695 | Enzyme | 0.680283592 |
| quercetin | Receptor-type tyrosine-protein phosphatase S | PTPRS | Q13332 | Phosphatase | 0.545871745 |
| quercetin | Estrogen receptor beta | ESR2 | Q92731 | Nuclear receptor | 0.545871745 |
| quercetin | DNA-3-methyladenine glycosylase | MPG | P29372 | Enzyme | 0.545871745 |
| quercetin | Solute carrier family 22 member 12 | SLC22A12 | Q96S37 | Electrochemical transporter | 0.545871745 |
| quercetin | Cyclin-dependent kinase 5/CDK5 activator 1 | CDK5R1 CDK5 | Q15078 Q00535 | Kinase | 0.538061807 |
| quercetin | Cyclin-dependent kinase 1/cyclin B | CCNB3 CDK1 CCNB1 CCNB2 | Q8WWL7 P06493 P14635 O95067 | Other cytosolic protein | 0.538061807 |
| quercetin | Arginase-1 (by homology) | ARG1 | P05089 | Enzyme | 0.538061807 |
| quercetin | Cyclin-dependent kinase 6 | CDK6 | Q00534 | Kinase | 0.49851319 |
| quercetin | Cyclin-dependent kinase 2 | CDK2 | P24941 | Kinase | 0.49851319 |
| quercetin | Tyrosinase | TYR | P14679 | Oxidoreductase | 0.395895175 |
| quercetin | Estradiol 17-beta-dehydrogenase 1 | HSD17B1 | P14061 | Enzyme | 0.395895175 |
| quercetin | Aryl hydrocarbon receptor | AHR | P35869 | Transcription factor | 0.395895175 |
| quercetin | Estrogen-related receptor alpha | ESRRA | P11474 | Nuclear receptor | 0.395895175 |
| quercetin | Beta amyloid A4 protein | APP | P05067 | Membrane receptor | 0.261559713 |
| quercetin | Poly [ADP-ribose] polymerase-1 | PARP1 | P09874 | Enzyme | 0.261559713 |
| quercetin | Transthyretin | TTR | P02766 | Secreted protein | 0.261559713 |
| quercetin | Matrix metalloproteinase 12 | MMP12 | P39900 | Protease | 0.261559713 |
| quercetin | Lymphocyte differentiation antigen CD38 | CD38 | P28907 | Enzyme | 0.261559713 |
| quercetin | Aldo-keto reductase family 1 member B10 | AKR1B10 | O60218 | Enzyme | 0.261559713 |
| quercetin | Tankyrase-2 | TNKS2 | Q9H2K2 | Enzyme | 0.261559713 |
| quercetin | Tankyrase-1 | TNKS | O95271 | Enzyme | 0.261559713 |
| quercetin | DNA topoisomerase I (by homology) | TOP1 | P11387 | Isomerase | 0.261559713 |
| quercetin | Telomerase reverse transcriptase | TERT | O14746 | Enzyme | 0.198389229 |
| Syringetin | Aldose reductase | AKR1B1 | P15121 | Enzyme | 0.624540901 |
| Syringetin | Cytochrome P450 1B1 | CYP1B1 | Q16678 | Cytochrome P450 | 0.616165404 |
| Syringetin | Xanthine dehydrogenase | XDH | P47989 | Oxidoreductase | 0.591031507 |
| Syringetin | Carbonic anhydrase II | CA2 | P00918 | Lyase | 0.591031507 |
| Syringetin | Carbonic anhydrase VII | CA7 | P43166 | Lyase | 0.591031507 |
| Syringetin | Carbonic anhydrase XII | CA12 | O43570 | Lyase | 0.591031507 |
| Syringetin | Carbonic anhydrase IV | CA4 | P22748 | Lyase | 0.591031507 |
| Syringetin | Beta-secretase 1 | BACE1 | P56817 | Protease | 0.222720522 |
| Syringetin | Multidrug resistance-associated protein 1 | ABCC1 | P33527 | Primary active transporter | 0.180919787 |
| Syringetin | NADPH oxidase 4 | NOX4 | Q9NPH5 | Enzyme | 0.164184052 |
| Syringetin | Adenosine A3 receptor | ADORA3 | P0DMS8 | Family A G protein-coupled receptor | 0.139088623 |
| Syringetin | Cytochrome P450 19A1 | CYP19A1 | P11511 | Cytochrome P450 | 0.130706653 |
| Syringetin | P-glycoprotein 1 | ABCB1 | P08183 | Primary active transporter | 0.130706653 |
| Syringetin | Estradiol 17-beta-dehydrogenase 2 | HSD17B2 | P37059 | Enzyme | 0.130706653 |
| Syringetin | Thrombin | F2 | P00734 | Protease | 0.122339194 |
| Syringetin | Insulin-like growth factor I receptor | IGF1R | P08069 | Kinase | 0.122339194 |
| Syringetin | Epidermal growth factor receptor erbB1 | EGFR | P00533 | Kinase | 0.122339194 |
| Syringetin | Adenosine A2a receptor | ADORA2A | P29274 | Family A G protein-coupled receptor | 0.113979815 |
| Syringetin | ATP-binding cassette sub-family G member 2 | ABCG2 | Q9UNQ0 | Primary active transporter | 0.113979815 |
| Syringetin | Microtubule-associated protein tau | MAPT | P10636 | Unclassified protein | 0.113979815 |
| Syringetin | Lysine-specific demethylase 4D-like | KDM4E | B2RXH2 | Eraser | 0.113979815 |
| Syringetin | G-protein coupled receptor 35 | GPR35 | Q9HC97 | Family A G protein-coupled receptor | 0.113979815 |
| Syringetin | DNA topoisomerase II alpha | TOP2A | P11388 | Isomerase | 0.113979815 |
| Syringetin | Tyrosine-protein kinase receptor FLT3 | FLT3 | P36888 | Kinase | 0.113979815 |
| Syringetin | Insulin receptor | INSR | P06213 | Kinase | 0.113979815 |
| Syringetin | Acetylcholinesterase | ACHE | P22303 | Hydrolase | 0.113979815 |
| Syringetin | Glyoxalase I | GLO1 | Q04760 | Enzyme | 0.113979815 |
| Syringetin | Myosin light chain kinase, smooth muscle | MYLK | Q15746 | Kinase | 0.113979815 |
| Syringetin | Tyrosine-protein kinase SYK | SYK | P43405 | Kinase | 0.113979815 |
| Syringetin | PI3-kinase p110-gamma subunit | PIK3CG | P48736 | Enzyme | 0.113979815 |
| Syringetin | DNA-(apurinic or apyrimidinic site) lyase | APEX1 | P27695 | Enzyme | 0.113979815 |
| Syringetin | Carbonic anhydrase VI | CA6 | P23280 | Lyase | 0.113979815 |
| Syringetin | Vasopressin V2 receptor | AVPR2 | P30518 | Family A G protein-coupled receptor | 0.113979815 |
| Syringetin | Monoamine oxidase A | MAOA | P21397 | Oxidoreductase | 0.113979815 |
| Syringetin | Serine/threonine-protein kinase PIM1 | PIM1 | P11309 | Kinase | 0.113979815 |
| Syringetin | Arachidonate 5-lipoxygenase | ALOX5 | P09917 | Oxidoreductase | 0.113979815 |
| Syringetin | Serine/threonine-protein kinase Aurora-B | AURKB | Q96GD4 | Kinase | 0.113979815 |
| Syringetin | Dopamine D4 receptor | DRD4 | P21917 | Family A G protein-coupled receptor | 0.113979815 |
| Syringetin | Adenosine A1 receptor (by homology) | ADORA1 | P30542 | Family A G protein-coupled receptor | 0.113979815 |
| Syringetin | Myeloperoxidase | MPO | P05164 | Enzyme | 0.113979815 |
| Syringetin | PI3-kinase p85-alpha subunit | PIK3R1 | P27986 | Enzyme | 0.113979815 |
| Syringetin | Death-associated protein kinase 1 | DAPK1 | P53355 | Kinase | 0.113979815 |
| Syringetin | Liver glycogen phosphorylase | PYGL | P06737 | Enzyme | 0.113979815 |
| Syringetin | Carbonic anhydrase I | CA1 | P00915 | Lyase | 0.113979815 |
| Syringetin | Glycogen synthase kinase-3 beta | GSK3B | P49841 | Kinase | 0.113979815 |
| Syringetin | Tyrosine-protein kinase SRC | SRC | P12931 | Kinase | 0.113979815 |
| Syringetin | Focal adhesion kinase 1 | PTK2 | Q05397 | Kinase | 0.113979815 |
| Syringetin | Vascular endothelial growth factor receptor 2 | KDR | P35968 | Kinase | 0.113979815 |
| Syringetin | Matrix metalloproteinase 13 | MMP13 | P45452 | Protease | 0.113979815 |
| Syringetin | Matrix metalloproteinase 3 | MMP3 | P08254 | Protease | 0.113979815 |
| Syringetin | Carbonic anhydrase III | CA3 | P07451 | Lyase | 0.113979815 |
| Syringetin | Arachidonate 15-lipoxygenase | ALOX15 | P16050 | Enzyme | 0.113979815 |
| Syringetin | Serine/threonine-protein kinase PLK1 | PLK1 | P53350 | Kinase | 0.113979815 |
| Syringetin | Cyclin-dependent kinase 1 | CDK1 | P06493 | Kinase | 0.113979815 |
| Syringetin | Matrix metalloproteinase 9 | MMP9 | P14780 | Protease | 0.113979815 |
| Syringetin | Matrix metalloproteinase 2 | MMP2 | P08253 | Protease | 0.113979815 |
| Syringetin | Protein kinase N1 | PKN1 | Q16512 | Kinase | 0.113979815 |
| Syringetin | Carbonic anhydrase XIV | CA14 | Q9ULX7 | Lyase | 0.113979815 |
| Syringetin | Carbonic anhydrase IX | CA9 | Q16790 | Lyase | 0.113979815 |
| Syringetin | Casein kinase II alpha | CSNK2A1 | P68400 | Kinase | 0.113979815 |
| Syringetin | Arachidonate 12-lipoxygenase | ALOX12 | P18054 | Enzyme | 0.113979815 |
| Syringetin | Hepatocyte growth factor receptor | MET | P08581 | Kinase | 0.113979815 |
| Syringetin | Serine/threonine-protein kinase NEK2 | NEK2 | P51955 | Kinase | 0.113979815 |
| Syringetin | Carbonic anhydrase XIII (by homology) | CA13 | Q8N1Q1 | Lyase | 0.113979815 |
| Syringetin | Interleukin-8 receptor A | CXCR1 | P25024 | Family A G protein-coupled receptor | 0.113979815 |
| Syringetin | CaM kinase II beta | CAMK2B | Q13554 | Kinase | 0.113979815 |
| Syringetin | ALK tyrosine kinase receptor | ALK | Q9UM73 | Kinase | 0.113979815 |
| Syringetin | Serine/threonine-protein kinase AKT | AKT1 | P31749 | Kinase | 0.113979815 |
| Syringetin | Serine/threonine-protein kinase NEK6 | NEK6 | Q9HC98 | Kinase | 0.113979815 |
| Syringetin | Phospholipase A2 group 1B | PLA2G1B | P04054 | Enzyme | 0.113979815 |
| Syringetin | Carbonic anhydrase VA | CA5A | P35218 | Lyase | 0.113979815 |
| Syringetin | Tyrosine-protein kinase receptor UFO | AXL | P30530 | Kinase | 0.113979815 |
| Syringetin | NUAK family SNF1-like kinase 1 | NUAK1 | O60285 | Kinase | 0.113979815 |
| Syringetin | Aldo-keto reductase family 1 member C2 (by homology) | AKR1C2 | P52895 | Enzyme | 0.113979815 |
| Syringetin | Aldo-keto reductase family 1 member C1 (by homology) | AKR1C1 | Q04828 | Enzyme | 0.113979815 |
| Syringetin | Aldo-keto-reductase family 1 member C3 (by homology) | AKR1C3 | P42330 | Enzyme | 0.113979815 |
| Syringetin | Aldo-keto reductase family 1 member C4 (by homology) | AKR1C4 | P17516 | Enzyme | 0.113979815 |
| Syringetin | Aldehyde reductase (by homology) | AKR1A1 | P14550 | Enzyme | 0.113979815 |
| Syringetin | Delta opioid receptor | OPRD1 | P41143 | Family A G protein-coupled receptor | 0.113979815 |
| Syringetin | Plasminogen | PLG | P00747 | Protease | 0.10560828 |
| Syringetin | Beta amyloid A4 protein | APP | P05067 | Membrane receptor | 0.10560828 |
| Syringetin | Cyclin-dependent kinase 2 | CDK2 | P24941 | Kinase | 0.10560828 |
| Syringetin | Estradiol 17-beta-dehydrogenase 1 | HSD17B1 | P14061 | Enzyme | 0.10560828 |
| Syringetin | Phospholipase A2 group IIA | PLA2G2A | P14555 | Enzyme | 0.10560828 |
| Syringetin | Butyrylcholinesterase | BCHE | P06276 | Hydrolase | 0.097239989 |
| Syringetin | Beta-galactoside alpha-2,6-sialyltransferase 1 | ST6GAL1 | P15907 | Transferase | 0.097239989 |
| Syringetin | Cyclin-dependent kinase 5/CDK5 activator 1 | CDK5R1 CDK5 | Q15078 Q00535 | Kinase | 0.097239989 |
| Syringetin | Cyclin-dependent kinase 1/cyclin B | CCNB3 CDK1 CCNB1 CCNB2 | Q8WWL7 P06493 P14635 O95067 | Other cytosolic protein | 0.097239989 |
| Syringetin | Cyclin-dependent kinase 6 | CDK6 | Q00534 | Kinase | 0.097239989 |
| Syringetin | Arginase-1 (by homology) | ARG1 | P05089 | Enzyme | 0.097239989 |
| Syringetin | Induced myeloid leukemia cell differentiation protein Mcl-1 | MCL1 | Q07820 | Other cytosolic protein | 0.097239989 |
| Syringetin | Mu opioid receptor | OPRM1 | P35372 | Family A G protein-coupled receptor | 0.097239989 |
| Syringetin | Telomerase reverse transcriptase | TERT | O14746 | Enzyme | 0.097239989 |
| Syringetin | Estrogen receptor beta | ESR2 | Q92731 | Nuclear receptor | 0.097239989 |
| Syringetin | Tyrosinase | TYR | P14679 | Oxidoreductase | 0.097239989 |
| Syringetin | Stem cell growth factor receptor | KIT | P10721 | Kinase | 0.097239989 |
| Syringetin | LXR-alpha | NR1H3 | Q13133 | Nuclear receptor | 0.097239989 |
| Syringetin | Solute carrier family 22 member 12 | SLC22A12 | Q96S37 | Electrochemical transporter | 0.097239989 |
| Syringetin | Aryl hydrocarbon receptor | AHR | P35869 | Transcription factor | 0.097239989 |
| Syringetin | Estrogen-related receptor alpha | ESRRA | P11474 | Nuclear receptor | 0.097239989 |
| tanshinone iia | Aldose reductase | AKR1B1 | P15121 | Enzyme | 1 |
| tanshinone iia | Acyl coenzyme A:cholesterol acyltransferase | CES1 | P23141 | Enzyme | 1 |
| tanshinone iia | Telomerase reverse transcriptase | TERT | O14746 | Enzyme | 1 |
| tanshinone iia | Protein-tyrosine phosphatase 1C | PTPN6 | P29350 | Phosphatase | 1 |
| tanshinone iia | Carboxylesterase 2 | CES2 | O00748 | Enzyme | 1 |
| tanshinone iia | Protein-tyrosine phosphatase 2C | PTPN11 | Q06124 | Phosphatase | 1 |
| tanshinone iia | EZH2/SUZ12/EED complex | EED SUZ12 EZH2 | O75530 Q15022 Q15910 | Writer | 0.198389229 |
| tanshinone iia | EZH2/SUZ12/EED/RBBP7/RBBP4 | RBBP4 RBBP7 EED SUZ12 EZH2 | Q09028 Q16576 O75530 Q15022 Q15910 | Writer | 0.166798772 |
| tanshinone iia | Dual specificity phosphatase Cdc25C | CDC25C | P30307 | Phosphatase | 0.111501865 |
| tanshinone iia | Mannose-6-phosphate isomerase | MPI | P34949 | Isomerase | 0.111501865 |
| tanshinone iia | Dual specificity phosphatase Cdc25A | CDC25A | P30304 | Phosphatase | 0.111501865 |
| tanshinone iia | Leukocyte common antigen | PTPRC | P08575 | Enzyme | 0.111501865 |
| tanshinone iia | Dual specificity phosphatase Cdc25B | CDC25B | P30305 | Phosphatase | 0.111501865 |
| tanshinone iia | Arachidonate 5-lipoxygenase (by homology) | ALOX5 | P09917 | Oxidoreductase | 0.111501865 |
| tanshinone iia | Serotonin 6 (5-HT6) receptor | HTR6 | P50406 | Family A G protein-coupled receptor | 0.111501865 |
| tanshinone iia | Phosphodiesterase 10A | PDE10A | Q9Y233 | Phosphodiesterase | 0.111501865 |
| tanshinone iia | Androgen Receptor | AR | P10275 | Nuclear receptor | 0.111501865 |
| tanshinone iia | Cytochrome P450 19A1 | CYP19A1 | P11511 | Cytochrome P450 | 0.111501865 |
| tanshinone iia | P2X purinoceptor 7 | P2RX7 | Q99572 | Ligand-gated ion channel | 0.111501865 |
| tanshinone iia | Melatonin receptor 1A | MTNR1A | P48039 | Family A G protein-coupled receptor | 0.111501865 |
| tanshinone iia | Melatonin receptor 1B | MTNR1B | P49286 | Family A G protein-coupled receptor | 0.111501865 |
| tanshinone iia | Bombesin receptor subtype-3 | BRS3 | P32247 | Family A G protein-coupled receptor | 0.111501865 |
| tanshinone iia | Metabotropic glutamate receptor 5 | GRM5 | P41594 | Family C G protein-coupled receptor | 0.111501865 |
| tanshinone iia | Dopamine transporter | SLC6A3 | Q01959 | Electrochemical transporter | 0.111501865 |
| tanshinone iia | Nuclear receptor subfamily 4 group A member 1 | NR4A1 | P22736 | Nuclear receptor | 0.111501865 |
| tanshinone iia | Translocator protein (by homology) | TSPO | P30536 | Membrane receptor | 0.111501865 |
| tanshinone iia | Orexin receptor 2 | HCRTR2 | O43614 | Family A G protein-coupled receptor | 0.111501865 |
| tanshinone iia | Orexin receptor 1 | HCRTR1 | O43613 | Family A G protein-coupled receptor | 0.111501865 |
| tanshinone iia | Progesterone receptor | PGR | P06401 | Nuclear receptor | 0.111501865 |
| tanshinone iia | Monoglyceride lipase | MGLL | Q99685 | Enzyme | 0.111501865 |
| tanshinone iia | Mitogen-activated protein kinase kinase kinase 8 | MAP3K8 | P41279 | Kinase | 0.111501865 |
| tanshinone iia | Serine/threonine-protein kinase Aurora-B | AURKB | Q96GD4 | Kinase | 0.111501865 |
| tanshinone iia | MAP kinase-activated protein kinase 2 | MAPKAPK2 | P49137 | Kinase | 0.111501865 |
| tanshinone iia | Casein kinase I gamma 1 | CSNK1G1 | Q9HCP0 | Kinase | 0.111501865 |
| tanshinone iia | Histamine H3 receptor | HRH3 | Q9Y5N1 | Family A G protein-coupled receptor | 0.111501865 |
| tanshinone iia | Cathepsin S | CTSS | P25774 | Protease | 0.111501865 |
| tanshinone iia | Bromodomain-containing protein 4 | BRD4 | O60885 | Reader | 0.111501865 |
| tanshinone iia | Bromodomain-containing protein 2 | BRD2 | P25440 | Reader | 0.111501865 |
| tanshinone iia | Bromodomain-containing protein 3 | BRD3 | Q15059 | Reader | 0.111501865 |
| tanshinone iia | Phosphodiesterase 5A | PDE5A | O76074 | Phosphodiesterase | 0.111501865 |
| tanshinone iia | Voltage-gated potassium channel subunit Kv1.5 | KCNA5 | P22460 | Voltage-gated ion channel | 0.111501865 |
| tanshinone iia | Anandamide amidohydrolase | FAAH | O00519 | Enzyme | 0.111501865 |
| tanshinone iia | 11-beta-hydroxysteroid dehydrogenase 1 | HSD11B1 | P28845 | Enzyme | 0.111501865 |
